# Supplementary material for: Dual RNA-seq transcriptional analysis of wheat roots colonized by Azospirillum brasilense reveals up-regulation of nutrient acquisition and cell cycle genes
Source: PubMed Central journal article supplement (PMC4042000; doi:10.1186/1471-2164-15-378), 2014-05-16
Supplement: 12864_2013_6083_MOESM1_ESM.pdf [file 12864_2013_6083_MOESM1_ESM.pdf]

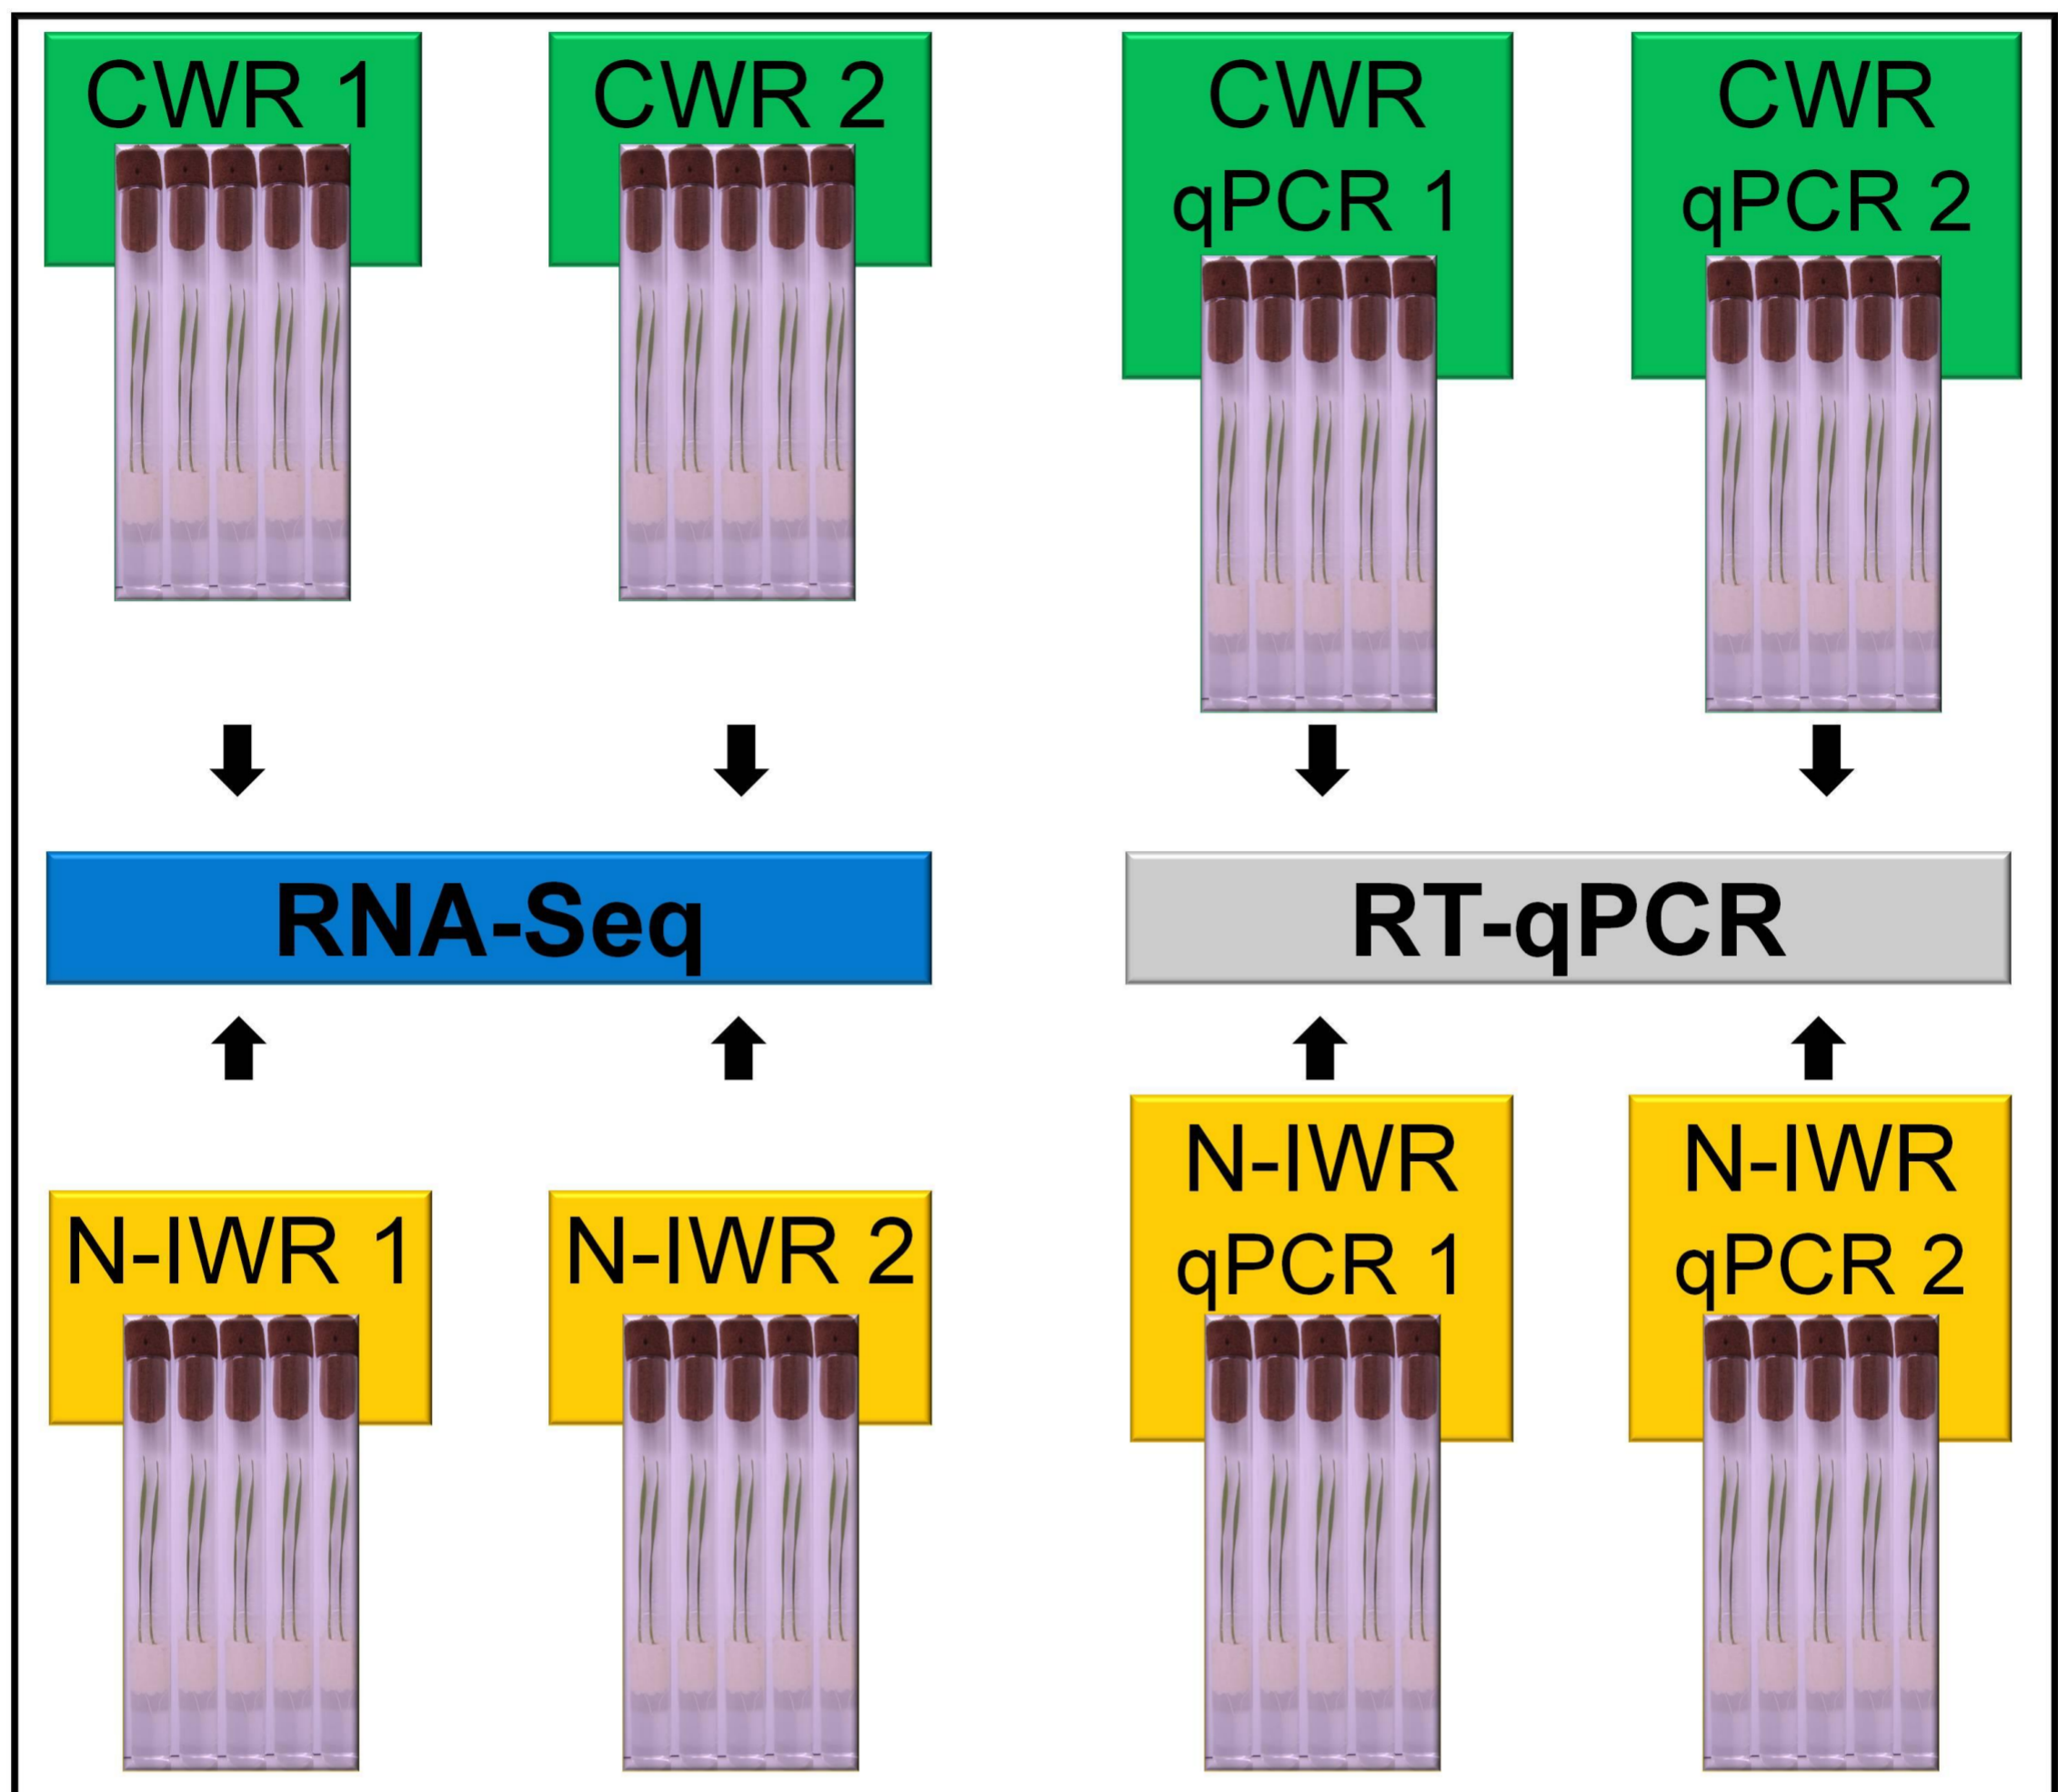

**Figure 1S** RNA-Seq and RT-qPCR experiments design

CWR: colonized wheat roots; N-IWR: non-inoculated wheat roots; each biological replicate was compound by five tubes with two seedlings per tube.
