# Supplementary material for: Dual RNA-seq transcriptional analysis of wheat roots colonized by Azospirillum brasilense reveals up-regulation of nutrient acquisition and cell cycle genes
Source: PubMed Central journal article supplement (PMC4042000; doi:10.1186/1471-2164-15-378), 2014-05-16
Supplement: 12864_2013_6083_MOESM2_ESM.pdf [file 12864_2013_6083_MOESM2_ESM.pdf]

**Table S1A** RNA-seq: mapping results

| <b>Libraries</b> | <b>Sequenced reads</b> | <b>rRNA-free reads</b> | <b>UniGenes mapped reads</b> | <b><i>T. aestivum</i>-microRNA mapped reads</b> | <b><i>A. brasilense</i> mapped reads</b> | <b>Assembled-EST mapped reads</b> |
|------------------|------------------------|------------------------|------------------------------|-------------------------------------------------|------------------------------------------|-----------------------------------|
| <b>CWR</b>       | 134,846,641            | 75,789,954             | 9,441,999                    | 7,292                                           | 106,285                                  | 8,528,773                         |
| <b>N-IWR</b>     | 171,187,552            | 103,071,790            | 14,279,346                   | 11,253                                          | 6,214                                    | 11,124,992                        |
| <b>Total</b>     | 306,034,193            | 178,861,744            | 23,721,345                   | 18,545                                          | 112,499                                  | 19,653,765                        |

**Table S1B** RNA-seq: expressed and differentially expressed genes

| <b>Libraries</b>      | <b>UniGene-EST</b> | <b><i>T. aestivum</i> microRNA</b> | <b>Assembled-EST</b> | <b>Total of <i>T. aestivum</i> EST</b> | <b><i>A. brasilense</i></b>         |
|-----------------------|--------------------|------------------------------------|----------------------|----------------------------------------|-------------------------------------|
| <b>Expressed</b>      | 16,645             | 15                                 | 6,570                | 23,215                                 | 228 <sup>a</sup> / 702 <sup>b</sup> |
| <b>Down-regulated</b> | 304                | 0                                  | 159                  | 463                                    | ND <sup>c</sup>                     |
| <b>Up-regulated</b>   | 186                | 1                                  | 127                  | 313                                    | ND <sup>c</sup>                     |

<sup>a</sup> 3X or higher coverage; <sup>b</sup> 1X or higher coverage; <sup>c</sup> Not determined.
