# Supplementary material for: Dual RNA-seq transcriptional analysis of wheat roots colonized by Azospirillum brasilense reveals up-regulation of nutrient acquisition and cell cycle genes
Source: PubMed Central journal article supplement (PMC4042000; doi:10.1186/1471-2164-15-378), 2014-05-16
Supplement: 12864_2013_6083_MOESM4_ESM.pdf [file 12864_2013_6083_MOESM4_ESM.pdf]

**Table S3** *Triticum aestivum* expressed micro-RNAs

| Micro-RNA ID | Fold Change <sup>a</sup> | <i>p</i> -value | N-IWR coverage   | CWR coverage     |
|--------------|--------------------------|-----------------|------------------|------------------|
| tae-MIR444   | 8.6                      | 0.0195          | 1.3 <sup>b</sup> | 7.0              |
| tae-MIR1121  | 5.7                      | 0.3286          | 1.5 <sup>b</sup> | 4.1              |
| tae-MIR1137  | 2.5                      | 0.2219          | 1.7 <sup>b</sup> | 3.7              |
| tae-MIR1122  | 1.8                      | 0.2356          | 12.5             | 17.1             |
| tae-MIR2030  | 1.5                      | 0.5086          | 10.8             | 11.5             |
| tae-MIR2009c | 1.3                      | 0.9223          | 14.4             | 11.1             |
| tae-MIR160   | 1.2                      | 0.7034          | 1028.0           | 837.2            |
| tae-MIR2014  | 1.1                      | 0.9222          | 473.5            | 353.1            |
| tae-MIR1120  | 2.4                      | 0.7040          | 6.3              | 2.5 <sup>b</sup> |
| tae-MIR1139  | 2.2                      | 0.2681          | 6.9              | 2.3 <sup>b</sup> |
| tae-MIR1119  | 2.2                      | 0.2865          | 56.2             | 21.5             |
| tae-MIR1126  | 1.8                      | 0.6350          | 93.0             | 36.9             |
| tae-MIR1138  | 1.5                      | 0.2464          | 9.8              | 3.4              |
| tae-MIR2028  | 1.3                      | 0.1127          | 1931.8           | 1065.7           |
| tae-MIR1134  | 1.3                      | 0.8766          | 10.8             | 6.9              |

<sup>a</sup> Fold-change in red indicates lower level of expression in the colonized wheat roots (CWR); <sup>b</sup> Not considered as expressed micro-RNA.
