# Supplementary material for: Dual RNA-seq transcriptional analysis of wheat roots colonized by Azospirillum brasilense reveals up-regulation of nutrient acquisition and cell cycle genes
Source: PubMed Central journal article supplement (PMC4042000; doi:10.1186/1471-2164-15-378), 2014-05-16
Supplement: 12864_2013_6083_MOESM5_ESM.pdf [file 12864_2013_6083_MOESM5_ESM.pdf]

**Table S4** Differentially expressed *Triticum aestivum*-ESTs

| Sequence ID  | Fold<br>Change <sup>a</sup> | <i>p</i> -value | Sequence description                                                         |
|--------------|-----------------------------|-----------------|------------------------------------------------------------------------------|
| Ta_S58847638 | (+)ND                       | 0.003693        | Hypothetical protein osi_06374 [Oryza sativa Indica Group]                   |
| Ta_S58840665 | (+)ND                       | 0.044869        | Hypothetical protein osj_33218 [Oryza sativa Japonica Group]                 |
| Ta_S58861971 | (+)ND                       | 0.030767        | Protein                                                                      |
| contig_119   | (+)ND                       | 2.56E-07        | Not found                                                                    |
| Ta_S58868582 | (+)ND                       | 0.000289        | Not found                                                                    |
| Ta_S37855427 | (+)ND                       | 0.002587        | Not found                                                                    |
| Ta_S32661173 | (+)ND                       | 0.037164        | Not found                                                                    |
| Ta_S58882496 | 951.2                       | 9.05E-23        | Not found                                                                    |
| contig_160   | 765.2                       | 6.84E-21        | Not found                                                                    |
| contig_3469  | 645.0                       | 2.00E-32        | Transcriptional regulator                                                    |
| Ta_S58859374 | 571.2                       | 0.004452        | Not found                                                                    |
| Ta_S37940839 | 505.1                       | 0.005203        | Pre-mrna processing protein expressed                                        |
| contig_4627  | 389.5                       | 2.60E-16        | Not found                                                                    |
| Ta_S58863092 | 340.5                       | 0.003014        | Alpha-l-fucosidase 2 precursor                                               |
| contig_2198  | 123.6                       | 0.015971        | Not found                                                                    |
| Ta_S52544833 | 80.0                        | 0.037528        | Small heat shock protein                                                     |
| Ta_S16236735 | 76.4                        | 0.019596        | Heat-shock protein                                                           |
| Ta_S58854607 | 59.8                        | 0.001188        | Replication factor c subunit                                                 |
| Ta_S16229254 | 48.9                        | 0.04891         | Kda class iv heat shock protein                                              |
| Ta_S52547097 | 46.7                        | 0.028523        | Probable serine threonine-protein kinase at1g54610-like                      |
| Ta_S58853475 | 39.9                        | 4.51E-05        | Not found                                                                    |
| contig_5353  | 34.0                        | 5.87E-10        | Not found                                                                    |
| Ta_S52541981 | 29.4                        | 0.019756        | Kda class iii heat shock                                                     |
| Ta_S58886208 | 23.3                        | 0.010146        | Not found                                                                    |
| contig_2820  | 22.2                        | 0.038959        | Not found                                                                    |
| Ta_S58858619 | 19.9                        | 0.029221        | Low molecular weight heat shock protein                                      |
| Ta_S12923094 | 19.5                        | 0.025603        | Not found                                                                    |
| Ta_S58850802 | 18.8                        | 9.18E-05        | Not found                                                                    |
| Ta_S52541158 | 18.5                        | 0.020768        | PREDICTED: uncharacterized protein LOC100846009<br>[Brachypodium distachyon] |

|              |      |          |                                                                |
|--------------|------|----------|----------------------------------------------------------------|
| contig_2853  | 16.8 | 0.0424   | Not found                                                      |
| Ta_S58884106 | 14.9 | 0.000358 | Af114171_11disease resistance protein rpm1 homolog             |
| Ta_S58859323 | 14.8 | 0.041305 | Not found                                                      |
| Ta_S22373503 | 14.5 | 0.035288 | Hsf-type dna-binding domain containing expressed               |
| Ta_S58884158 | 14.0 | 5.29E-09 | Cytochrome p450 liketbp                                        |
| contig_4027  | 13.8 | 0.012235 | Hsf-type dna-binding domain containing expressed               |
| Ta_S58887920 | 12.5 | 0.018728 | Pentatricopeptide repeat-containing protein mitochondrial-like |
| Ta_S37815739 | 12.4 | 5.25E-05 | Caffeic acid 3-o-                                              |
| Ta_S58844263 | 12.1 | 0.015089 | Not found                                                      |
| Ta_S17982440 | 12.1 | 3.85E-11 | Serine acetyltransferase                                       |
| Ta_S58846190 | 11.9 | 0.006763 | La domain family                                               |
| Ta_S37845209 | 10.5 | 0.01791  | Not found                                                      |
| Ta_S32681735 | 10.3 | 0.000194 | Not found                                                      |
| Ta_S32654208 | 9.9  | 0.005766 | Not found                                                      |
| contig_565   | 9.7  | 0.013784 | Not found                                                      |
| Ta_S58857445 | 9.4  | 0.009264 | Serine threonine-protein kinase                                |
| Ta_S58895571 | 8.9  | 0.002269 | Not found                                                      |
| Ta_S16248940 | 8.5  | 0.017956 | Not found                                                      |
| contig_312   | 8.5  | 1.58E-05 | Not found                                                      |
| Ta_S58889424 | 8.0  | 0.001986 | Not found                                                      |
| Ta_S58891564 | 7.9  | 6.03E-05 | Cytochrome p450 liketbp                                        |
| Ta_S58856591 | 7.6  | 0.033515 | Not found                                                      |
| Ta_S59490000 | 6.9  | 0.046498 | Myb transcription factor                                       |
| Ta_S13230809 | 6.6  | 0.015398 | Not found                                                      |
| Ta_S32507710 | 6.2  | 4.26E-06 | Heat shock cognate 70 kda expressed                            |
| Ta_S58842184 | 5.7  | 0.028196 | Serine threonine-protein kinase rio1-like                      |
| Ta_S12902351 | 5.7  | 0.040947 | Endo-beta- -glucanase                                          |
| contig_4604  | 5.6  | 0.044513 | Aberrant pollen transmission                                   |
| Ta_S58859081 | 5.5  | 0.002069 | Protein                                                        |
| Ta_S13177111 | 5.4  | 0.023428 | Not found                                                      |
| Ta_S58839733 | 5.3  | 0.009311 | Rna pseudourine synthase 7                                     |
| Ta_S13203445 | 5.3  | 0.007348 | Not found                                                      |
| Ta_S13130963 | 5.3  | 0.003439 | Not found                                                      |

|              |     |          |                                                        |
|--------------|-----|----------|--------------------------------------------------------|
| Ta_S13128615 | 5.0 | 0.005439 | Not found                                              |
| contig_5105  | 5.0 | 0.002405 | Calcium-transporting atpase plasma membrane-type-like  |
| contig_5384  | 4.9 | 6.71E-05 | Not found                                              |
| contig_3896  | 4.9 | 0.023133 | Atp synthase f0 subunit 6                              |
| contig_2359  | 4.8 | 0.0422   | Not found                                              |
| Ta_S58906848 | 4.8 | 0.035364 | Not found                                              |
| contig_3292  | 4.7 | 0.001588 | Ribonucleotide reductase                               |
| Ta_S58850217 | 4.7 | 0.035126 | Pentatricopeptide repeat-containing protein            |
| Ta_S58851704 | 4.6 | 0.019086 | Dna helicase                                           |
| Ta_S52543987 | 4.5 | 0.021261 | F-box protein at5g07610-like                           |
| contig_2239  | 4.5 | 0.000884 | Abc transporter b family member 20-like                |
| Ta_S12999712 | 4.5 | 0.004115 | Retrotransposon unclassified                           |
| Ta_S16246863 | 4.4 | 0.048563 | F-box protein at5g52880-like                           |
| Ta_S50388141 | 4.4 | 0.000164 | Not found                                              |
| contig_5480  | 4.3 | 0.001514 | Dna repair protein rad50                               |
| Ta_S13165985 | 4.3 | 0.027464 | Auxin-induced protein 15a                              |
| Ta_S58862793 | 4.3 | 0.049535 | Not found                                              |
| contig_3750  | 4.3 | 0.006817 | Transformation transcription domain-associated protein |
| Ta_S13177057 | 4.2 | 0.009059 | Protein (low-affinity nitrate transporter)             |
| contig_2223  | 4.2 | 0.012425 | Not found                                              |
| contig_4749  | 4.2 | 0.012448 | Not found                                              |
| Ta_S13243932 | 4.2 | 0.010607 | Protein                                                |
| Ta_S13167109 | 4.2 | 0.016915 | Not found                                              |
| Ta_S13227407 | 4.1 | 0.0135   | Not found                                              |
| Ta_S58857760 | 4.1 | 0.015583 | Not found                                              |
| Ta_S22371585 | 4.1 | 0.020454 | Not found                                              |
| Ta_S58842370 | 4.0 | 0.015452 | Gdp-mannose transporter                                |
| contig_6225  | 3.9 | 0.001586 | Terminal uridylyltransferase 7-like                    |
| contig_4425  | 3.9 | 0.003578 | Not found                                              |
| Ta_S37759224 | 3.9 | 0.006323 | Bowman-birk trypsin inhibitor-like protein             |
| Ta_S19223311 | 3.8 | 0.000329 | Snf2 super family                                      |
| contig_4264  | 3.8 | 0.000279 | Not found                                              |
| Ta_S58862912 | 3.8 | 0.023386 | Not found                                              |

|              |     |          |                                                                              |
|--------------|-----|----------|------------------------------------------------------------------------------|
| Ta_S16192587 | 3.8 | 0.01741  | Not found                                                                    |
| contig_4719  | 3.7 | 0.028446 | Hypothetical protein RAZWK3B_00585 [Roseobacter sp. Azwk-3b]                 |
| contig_2770  | 3.7 | 0.0001   | Beta-amyrin synthase                                                         |
| Ta_S13166085 | 3.7 | 0.022504 | Not found                                                                    |
| Ta_S17888799 | 3.7 | 0.004178 | PREDICTED: uncharacterized protein LOC100839923<br>[Brachypodium distachyon] |
| contig_3741  | 3.7 | 0.00033  | Beta-expansin 2 precursor                                                    |
| Ta_S58853302 | 3.7 | 0.017175 | Not found                                                                    |
| contig_1173  | 3.7 | 0.008315 | Not found                                                                    |
| Ta_S58853221 | 3.7 | 0.019972 | PREDICTED: uncharacterized protein LOC100835027<br>[Brachypodium distachyon] |
| Ta_S12888461 | 3.7 | 0.043034 | Not found                                                                    |
| Ta_S21611732 | 3.6 | 0.038114 | Not found                                                                    |
| contig_6844  | 3.6 | 0.047101 | Not found                                                                    |
| contig_5883  | 3.6 | 0.007309 | Amino acid permease family expressed                                         |
| contig_5199  | 3.6 | 0.002266 | Disease resistance protein rpm1-like                                         |
| Ta_S58868812 | 3.6 | 0.034298 | Epstein-barr virus ebna-1-like protein                                       |
| Ta_S13144009 | 3.6 | 0.045792 | 60s ribosomal protein l34                                                    |
| Ta_S32530535 | 3.5 | 0.002146 | Not found                                                                    |
| contig_896   | 3.5 | 0.000232 | Not found                                                                    |
| Ta_S32510701 | 3.5 | 0.023986 | Mitogen-activated protein kinase kinase 6-like (MAPK)                        |
| contig_1850  | 3.5 | 0.002    | Casein kinase i isoform delta-like                                           |
| Ta_S58861829 | 3.4 | 0.011656 | Beta-glucosidase 5-like isoform 2                                            |
| Ta_S22370985 | 3.4 | 0.022688 | Predicted protein [Hordeum vulgare subsp. Vulgare]                           |
| contig_4443  | 3.4 | 0.045306 | Not found                                                                    |
| contig_6114  | 3.4 | 0.031475 | Mac perforin domain containing protein                                       |
| contig_2182  | 3.4 | 0.007848 | Protein                                                                      |
| Ta_S32501583 | 3.4 | 0.016771 | Protein                                                                      |
| Ta_S58848661 | 3.3 | 0.025071 | Not found                                                                    |
| Ta_S58846759 | 3.3 | 0.031009 | Not found                                                                    |
| contig_3927  | 3.3 | 0.042921 | Not found                                                                    |
| contig_1285  | 3.3 | 0.048853 | Microtubule organization protein                                             |
| Ta_S13146836 | 3.3 | 0.015823 | 60s ribosomal protein l7-1                                                   |

|              |     |          |                                                                              |
|--------------|-----|----------|------------------------------------------------------------------------------|
| Ta_S58884395 | 3.2 | 9.90E-05 | Pg1 protein                                                                  |
| Ta_S17981880 | 3.2 | 0.006262 | Not found                                                                    |
| contig_3422  | 3.2 | 0.043532 | Hth dna-binding expressed                                                    |
| Ta_S58846451 | 3.2 | 0.022381 | Not found                                                                    |
| Ta_S58894107 | 3.2 | 0.024519 | Amino acid permease                                                          |
| Ta_S13172731 | 3.2 | 0.046943 | Cytochrome c oxidase polypeptide vib                                         |
| Ta_S32667864 | 3.2 | 0.016896 | Protein                                                                      |
| contig_6563  | 3.2 | 0.035511 | Cytochrome p450 71e1                                                         |
| Ta_S22381097 | 3.2 | 0.005502 | Otu-like cysteine protease family protein                                    |
| Ta_S58899343 | 3.1 | 0.003699 | Metal transporter nramp6-like                                                |
| contig_6095  | 3.1 | 0.00717  | Not found                                                                    |
| contig_1160  | 3.1 | 0.013055 | Brefeldin a-inhibited guanine nucleotide-exchange protein 1-like             |
| contig_2296  | 3.1 | 0.006482 | Hypothetical protein osi_11910 [Oryza sativa Indica Group]                   |
| Ta_S17976596 | 3.1 | 0.008875 | Sulphate transporter                                                         |
| Ta_S58857404 | 3.1 | 0.036759 | PREDICTED: uncharacterized protein LOC100842944<br>[Brachypodium distachyon] |
| Ta_S58841493 | 3.1 | 0.022736 | Retrotransposon unclassified                                                 |
| Ta_S17890893 | 3.1 | 0.039251 | Glutamine synthetase                                                         |
| contig_4775  | 3.1 | 0.000578 | 2-aminoethanethiol dioxygenase-like                                          |
| contig_3720  | 3.0 | 0.014501 | Not found                                                                    |
| Ta_S58851753 | 3.0 | 0.026695 | Tesmin tso1-like cxc domain containing expressed                             |
| Ta_S13048497 | 3.0 | 0.039859 | Reticulon                                                                    |
| contig_4741  | 3.0 | 0.007305 | Embryogenesis-associated protein emb8-like                                   |
| contig_1001  | 3.0 | 0.00441  | Not found                                                                    |
| contig_2667  | 3.0 | 0.045329 | Not found                                                                    |
| Ta_S17897607 | 2.9 | 0.018235 | Major facilitator protein                                                    |
| Ta_S43485972 | 2.9 | 0.010123 | Protein phosphatase 2c                                                       |
| contig_2113  | 2.9 | 0.013425 | Speckle-type poz protein                                                     |
| contig_6873  | 2.9 | 0.018253 | Predicted protein [Hordeum vulgare subsp. Vulgare]                           |
| contig_4732  | 2.9 | 0.024764 | Mrna-capping enzyme                                                          |
| contig_5266  | 2.9 | 0.012367 | Erect panicle 2 partial                                                      |
| contig_3994  | 2.9 | 0.026436 | Nodulin-like protein                                                         |
| Ta_S37772528 | 2.9 | 0.049742 | Minor histocompatibility antigen h13                                         |

|              |     |          |                                                                              |
|--------------|-----|----------|------------------------------------------------------------------------------|
| Ta_S58851000 | 2.9 | 0.017112 | Probable lrr receptor-like serine threonine-protein kinase<br>at3g47570-like |
| Ta_S14911635 | 2.9 | 0.047019 | Not found                                                                    |
| Ta_S13138899 | 2.9 | 0.002761 | Not found                                                                    |
| contig_237   | 2.9 | 0.008549 | 32 kda protein                                                               |
| Ta_S13165765 | 2.9 | 0.009439 | Not found                                                                    |
| contig_4540  | 2.9 | 0.028159 | Os02g0159200 [Oryza sativa Japonica Group]                                   |
| contig_4292  | 2.9 | 0.006344 | Nb-arc domain containing expressed                                           |
| contig_3393  | 2.9 | 0.034167 | Not found                                                                    |
| Ta_S58860687 | 2.9 | 0.006996 | Ulp1 protease                                                                |
| contig_3183  | 2.9 | 0.04096  | Phosphatidylinositol -kinase-like                                            |
| contig_2394  | 2.9 | 0.024308 | Nbs-lrr partial                                                              |
| contig_3573  | 2.9 | 0.0236   | Transposon expressed                                                         |
| Ta_S16199319 | 2.9 | 0.023912 | Not found                                                                    |
| contig_1438  | 2.9 | 0.037843 | Not found                                                                    |
| contig_1600  | 2.9 | 0.04453  | Rna recognition motif family expressed                                       |
| Ta_S32526552 | 2.8 | 0.04364  | Not found                                                                    |
| Ta_S32659341 | 2.8 | 0.030422 | Ribosomal protein s12                                                        |
| contig_614   | 2.8 | 0.010706 | Not found                                                                    |
| contig_3699  | 2.8 | 0.02532  | Histidine kinase- dna gyrase b- and hsp90-like atpase family<br>protein      |
| Ta_S26021394 | 2.8 | 0.040444 | Not found                                                                    |
| contig_4303  | 2.8 | 0.029942 | Not found                                                                    |
| contig_814   | 2.8 | 0.009313 | Not found                                                                    |
| Ta_S58840365 | 2.7 | 0.036137 | Not found                                                                    |
| Ta_S13046163 | 2.7 | 0.018747 | Pppde peptidase domain-containing protein 2-like                             |
| Ta_S58894413 | 2.7 | 0.035843 | 6-phosphofructokinase 4                                                      |
| contig_3852  | 2.7 | 0.020831 | Calpain-like protein                                                         |
| contig_2943  | 2.7 | 0.017313 | Nadh-ubiquinone oxidoreductase subunit                                       |
| Ta_S58851084 | 2.7 | 0.026077 | Not found                                                                    |
| contig_2700  | 2.7 | 0.015973 | Kinase-interacting protein 1                                                 |
| Ta_S58864379 | 2.7 | 0.02852  | Poly polymerase-like                                                         |
| Ta_S26022473 | 2.7 | 0.017016 | Zinc-finger protein                                                          |

|              |     |          |                                                                         |
|--------------|-----|----------|-------------------------------------------------------------------------|
| Ta_S13140457 | 2.7 | 0.026444 | Not found                                                               |
| Ta_S13124877 | 2.7 | 0.001877 | Initiation factor                                                       |
| contig_3450  | 2.7 | 0.004636 | Predicted protein [Hordeum vulgare subsp. Vulgare]                      |
| contig_6410  | 2.7 | 0.006995 | Aldose reductase                                                        |
| contig_31    | 2.6 | 0.036198 | Vacuolar protein sorting 13c                                            |
| Ta_S58885340 | 2.6 | 0.006231 | Dynamin-related protein 1e                                              |
| Ta_S58858194 | 2.6 | 0.028588 | Leukocyte receptor cluster                                              |
| contig_1142  | 2.6 | 0.04773  | Blight resistance protein                                               |
| Ta_S32626973 | 2.6 | 0.029205 | Peptide transporter ptr2-like                                           |
| contig_3362  | 2.6 | 0.002923 | Predicted protein [Hordeum vulgare subsp. Vulgare]                      |
| Ta_S58890953 | 2.6 | 0.04389  | Not found                                                               |
| Ta_S58847478 | 2.6 | 0.028481 | Nuclear factor related to kappa-b-binding protein                       |
| contig_708   | 2.6 | 0.041728 | Secondary cell wall-related glycosyltransferase family 47               |
| contig_6208  | 2.6 | 0.034429 | Not found                                                               |
| Ta_S58839330 | 2.6 | 0.023975 | Hypothetical protein osi_07633 [Oryza sativa Indica Group]              |
| contig_5714  | 2.6 | 0.039284 | Actin depolymerizing factor 4                                           |
| contig_1361  | 2.6 | 0.040104 | Not found                                                               |
| contig_7159  | 2.6 | 0.023099 | Serine carboxypeptidase                                                 |
| Ta_S32526666 | 2.6 | 0.017006 | Dehydration stress-induced protein                                      |
| Ta_S17979451 | 2.6 | 0.023471 | Magnesium transporter nipa2                                             |
| Ta_S58861380 | 2.5 | 0.045323 | G-type lectin s-receptor-like serine threonine-protein kinase rks1-like |
| Ta_S16212763 | 2.5 | 0.019474 | Galactose-1-phosphate uridylyltransferase                               |
| Ta_S32667278 | 2.5 | 0.019801 | Not found                                                               |
| Ta_S17889461 | 2.5 | 0.027488 | Sphingoid long-chain bases kinase 1                                     |
| contig_2612  | 2.5 | 0.031927 | Cytochrome c oxidase assembly protein                                   |
| contig_3696  | 2.5 | 0.005704 | U5 small nuclear ribonucleoprotein 200 kda helicase                     |
| Ta_S13141197 | 2.5 | 0.035223 | O-methyltransferase zrp4                                                |
| Ta_S12998046 | 2.5 | 0.023305 | Nadh-plastoquinone oxidoreductase subunit k                             |
| Ta_S13146753 | 2.5 | 0.025228 | 60s ribosomal protein l34                                               |
| Ta_S22378208 | 2.5 | 0.031434 | Beta-amyrin synthase                                                    |
| Ta_S58850705 | 2.5 | 0.041082 | Dna-directed rna polymerase e subunit 1-like                            |
| Ta_S58882670 | 2.5 | 0.039607 | Serine protease-like protein                                            |

|              |     |          |                                                                   |
|--------------|-----|----------|-------------------------------------------------------------------|
| Ta_S12906375 | 2.5 | 0.034624 | Mitochondrial substrate carrier family protein                    |
| contig_2456  | 2.5 | 0.021233 | Leaf senescence related                                           |
| Ta_S12977114 | 2.4 | 0.000897 | Rrna intron-encoded homing endonuclease                           |
| Ta_S17893420 | 2.4 | 0.008429 | Beta-expansin 1a expressed                                        |
| Ta_S26028788 | 2.4 | 0.03883  | Somatic embryogenesis receptor kinase                             |
| Ta_S16267847 | 2.4 | 0.040243 | Hsf-type dna-binding domain containing expressed                  |
| contig_2743  | 2.4 | 0.037249 | Tbc domain containing protein                                     |
| contig_2382  | 2.4 | 0.045883 | Transcription factor bhlh128                                      |
| Ta_S24512908 | 2.4 | 0.039708 | Not found                                                         |
| contig_2923  | 2.4 | 0.032901 | Callose synthase                                                  |
| contig_2142  | 2.4 | 0.037606 | Hypothetical protein osi_15330 [Oryza sativa Indica Group]        |
| Ta_S58895262 | 2.4 | 0.041213 | Protein                                                           |
| contig_3502  | 2.4 | 0.030821 | Vacuolar protein sorting 13c                                      |
| Ta_S58846204 | 2.4 | 0.047479 | Not found                                                         |
| Ta_S37811862 | 2.4 | 0.021538 | Dna binding protein                                               |
| Ta_S58853267 | 2.4 | 0.012625 | Lipid-binding serum glyco protein                                 |
| contig_2635  | 2.4 | 0.020216 | Abc transporter c family member 9-like                            |
| Ta_S50381169 | 2.4 | 0.049165 | Btb poz domain-containing protein at1g04390-like                  |
| Ta_S17977835 | 2.4 | 0.03057  | Cytochrome b561                                                   |
| contig_3132  | 2.4 | 0.027554 | Sister chromatid cohesion protein pds5                            |
| contig_56    | 2.4 | 0.014155 | Atp-dependent clp protease atp-binding subunit                    |
| Ta_S20999571 | 2.3 | 0.030328 | Probable xyloglucan endotransglucosylase hydrolase protein 8-like |
| Ta_S32516159 | 2.3 | 0.032981 | Not found                                                         |
| contig_7109  | 2.3 | 0.008957 | Glutamine expressed                                               |
| contig_2242  | 2.3 | 0.035709 | Premnaspirodiene oxygenase-like                                   |
| Ta_S17880905 | 2.3 | 0.048284 | 50s ribosomal protein l33                                         |
| Ta_S13148233 | 2.3 | 0.015525 | 60s ribosomal protein l34                                         |
| Ta_S26028472 | 2.3 | 0.043489 | Nbs-lrr disease resistance protein homologue                      |
| contig_2730  | 2.3 | 0.026903 | Chd3-type chromatin-remodeling factor pickle-like                 |
| contig_6511  | 2.3 | 0.049041 | Wd repeat-containing protein                                      |
| Ta_S12983024 | 2.3 | 0.04741  | Golgin candidate 5-like                                           |
| contig_619   | 2.3 | 0.032178 | Protein                                                           |
| contig_5981  | 2.3 | 0.019981 | Serine threonine-protein kinase sapk3-like                        |



|              |     |          |                                                                              |
|--------------|-----|----------|------------------------------------------------------------------------------|
| Ta_S32590426 | 2.3 | 0.003332 | Nadh-ubiquinone oxidoreductase chain                                         |
| Ta_S37852405 | 2.3 | 0.00411  | Protein kinase xa21                                                          |
| Ta_S32655890 | 2.3 | 0.02744  | Protein                                                                      |
| Ta_S32683311 | 2.2 | 0.031013 | Ternary complex factor mip1-like                                             |
| Ta_S58886404 | 2.2 | 0.035635 | Tbc domain containing protein                                                |
| contig_5002  | 2.2 | 0.013931 | Not found                                                                    |
| Ta_S17512385 | 2.2 | 0.047833 | Not found                                                                    |
| Ta_S37937220 | 2.2 | 0.027311 | Hypothetical protein SORBIDRAFT_04g028380 [Sorghum bicolor]                  |
| Ta_S58860293 | 2.2 | 0.03301  | Ubx domain-containing protein                                                |
| contig_791   | 2.2 | 0.00475  | Regulator of nonsense transcripts 1 homolog                                  |
| contig_6109  | 2.2 | 0.039413 | Probable importin subunit beta-4-like                                        |
| contig_6922  | 2.2 | 0.030893 | Poly polymerase catalytic domain containing expressed                        |
| Ta_S58895865 | 2.2 | 0.04609  | Not found                                                                    |
| Ta_S52542495 | 2.2 | 0.023677 | Cs 5                                                                         |
| contig_2968  | 2.2 | 0.036214 | Eukaryotic translation initiation factor 3 subunit c-like                    |
| Ta_S17890867 | 2.2 | 0.015013 | Os08g0110800 [Oryza sativa Japonica Group]                                   |
| contig_4114  | 2.2 | 0.048739 | PREDICTED: uncharacterized protein LOC100827929<br>[Brachypodium distachyon] |
| Ta_S13012043 | 2.2 | 0.030101 | Diphosphonucleotide phosphatase expressed                                    |
| contig_2240  | 2.2 | 0.048342 | Fkbp12-rapamycin complex-associated protein                                  |
| Ta_S58855127 | 2.2 | 0.023961 | Protein far1-related sequence 12-like                                        |
| Ta_S47005448 | 2.2 | 0.004909 | Sterol c-14 reductase                                                        |
| contig_2914  | 2.2 | 0.035397 | Protease do-like 7-like                                                      |
| contig_7023  | 2.2 | 0.034854 | Acc oxidase                                                                  |
| contig_5777  | 2.2 | 0.034466 | Beach domain-containing protein lvsA-like                                    |
| contig_2895  | 2.2 | 0.027153 | Serine threonine-protein kinase sapk2                                        |
| Ta_S13043514 | 2.1 | 0.024076 | PREDICTED: uncharacterized protein LOC100841045<br>[Brachypodium distachyon] |
| contig_2509  | 2.1 | 0.024492 | Not found                                                                    |
| contig_6340  | 2.1 | 0.016588 | Protein                                                                      |
| Ta_S22387577 | 2.1 | 0.010013 | Thioredoxin-like 4a                                                          |
| contig_4225  | 2.1 | 0.035959 | Calcium-transporting atpase endoplasmic reticulum-type-like                  |
| contig_4592  | 2.1 | 0.029819 | Not found                                                                    |

|              |       |          |                                                                                   |
|--------------|-------|----------|-----------------------------------------------------------------------------------|
| contig_354   | 2.1   | 0.040756 | Cytochrome b5 reductase 4-like                                                    |
| contig_691   | 2.1   | 0.027289 | U3 small nucleolar rna-associated protein 10 and nuc211 domain-containing protein |
| Ta_S32635933 | 2.1   | 0.039078 | Nodulin-related partial                                                           |
| contig_4052  | 2.1   | 0.045423 | Arp2 3 complex 34 kda subunit                                                     |
| Ta_S22378449 | 2.1   | 0.018241 | Protein                                                                           |
| Ta_S32565776 | 2.1   | 0.010922 | Duf246 domain-containing protein at1g04910-like                                   |
| contig_3678  | 2.1   | 0.03295  | Not found                                                                         |
| Ta_S58881778 | 2.1   | 0.045461 | Not found                                                                         |
| Ta_S58900180 | 2.1   | 0.042857 | Solute carrier family 35 member f1-like                                           |
| Ta_S58887074 | 2.1   | 0.027853 | Protein                                                                           |
| Ta_S12965080 | 2.0   | 0.031017 | Atp synthase subunit beta                                                         |
| Ta_S58865342 | 2.0   | 0.046041 | Protein far1-related sequence 5-like                                              |
| contig_1241  | 2.0   | 0.041959 | Predicted protein [Hordeum vulgare subsp. Vulgare]                                |
| Ta_S58902295 | 2.0   | 0.03139  | Seven transmembrane domain protein                                                |
| contig_454   | 2.0   | 0.034425 | Cop1-interacting protein                                                          |
| Ta_S13135140 | 2.0   | 0.044097 | Not found                                                                         |
| contig_2564  | 2.0   | 0.009796 | Not found                                                                         |
| contig_1395  | 2.0   | 0.033116 | Kinesin heavy chain                                                               |
| Ta_S12971663 | 2.0   | 0.036675 | Carrier protein                                                                   |
| contig_857   | 2.0   | 0.035726 | Gdp-mannose pyrophosphorylase                                                     |
| contig_395   | 2.0   | 0.043037 | Disease resistance protein rga4-like                                              |
| contig_2601  | 2.0   | 0.021933 | Protein kinase                                                                    |
| contig_2033  | 2.0   | 0.039417 | Not found                                                                         |
| contig_3412  | 2.0   | 0.014033 | Not found                                                                         |
| Ta_S37823504 | 2.0   | 0.040924 | Not found                                                                         |
| Ta_S12924295 | 2.0   | 0.043982 | Formiminotransferase- expressed                                                   |
| contig_1621  | 2.0   | 0.034748 | Nadh-ubiquinone oxidoreductase                                                    |
| Ta_S58864643 | (-)ND | 0.002036 | Retrotransposon unclassified                                                      |
| Ta_S58849115 | (-)ND | 0.017092 | Retrotransposon unclassified                                                      |
| Ta_S13223809 | (-)ND | 0.046522 | Ring-box protein                                                                  |
| Ta_S13149798 | (-)ND | 0.014972 | Transmembrane bax inhibitor motif-containing protein 4                            |
| Ta_S58912535 | (-)ND | 0.033338 | Wak1 - receptor-like cytoplasmic kinase ( -rlck) precursor defense                |

response to fungus

|              |       |          |                                                                              |
|--------------|-------|----------|------------------------------------------------------------------------------|
| Ta_S32656390 | (-)ND | 0.00326  | Zinc finger protein id1                                                      |
| contig_6889  | (-)ND | 0.005749 | Not found                                                                    |
| contig_6774  | (-)ND | 0.044708 | Not found                                                                    |
| Ta_S32605842 | (-)ND | 0.001484 | Not found                                                                    |
| Ta_S58841817 | (-)ND | 0.001981 | Not found                                                                    |
| Ta_S13128736 | (-)ND | 0.00209  | Not found                                                                    |
| Ta_S37864864 | (-)ND | 0.0035   | Not found                                                                    |
| Ta_S58845207 | (-)ND | 0.003902 | Not found                                                                    |
| Ta_S58854505 | (-)ND | 0.006751 | Not found                                                                    |
| Ta_S13181029 | (-)ND | 0.009241 | Not found                                                                    |
| Ta_S58845845 | (-)ND | 0.009801 | Not found                                                                    |
| Ta_S58898595 | (-)ND | 0.011382 | Not found                                                                    |
| Ta_S58852808 | (-)ND | 0.011659 | Not found                                                                    |
| Ta_S13143288 | (-)ND | 0.014402 | Not found                                                                    |
| Ta_S32611510 | (-)ND | 0.014905 | Not found                                                                    |
| Ta_S32629074 | (-)ND | 0.016429 | Not found                                                                    |
| Ta_S13031432 | (-)ND | 0.018661 | Not found                                                                    |
| Ta_S32519859 | (-)ND | 0.018718 | Not found                                                                    |
| Ta_S37936079 | (-)ND | 0.0191   | Not found                                                                    |
| Ta_S32515094 | (-)ND | 0.028336 | Not found                                                                    |
| Ta_S58848140 | (-)ND | 0.031894 | Not found                                                                    |
| Ta_S58912831 | (-)ND | 0.033668 | Not found                                                                    |
| Ta_S13173968 | (-)ND | 0.033907 | Not found                                                                    |
| Ta_S13129446 | (-)ND | 0.039654 | Not found                                                                    |
| contig_1563  | 296.8 | 0.005116 | Hypothetical protein EB105725_31_00165 [Escherichia blattae<br>NBRC 105725]  |
| Ta_S17989215 | 224.8 | 0.012153 | Not found                                                                    |
| Ta_S18007616 | 86.1  | 0.035934 | F-box protein interaction domain containing protein                          |
| contig_122   | 74.4  | 0.020042 | Kgg repeat-containing stress-induced protein                                 |
| contig_7138  | 47.7  | 0.000812 | PREDICTED: uncharacterized protein LOC100828580<br>[Brachypodium distachyon] |
| Ta_S58889718 | 34.9  | 0.000155 | Not found                                                                    |

|              |      |          |                                                                              |
|--------------|------|----------|------------------------------------------------------------------------------|
| Ta_S22379260 | 33.3 | 2.83E-05 | Predicted protein [Hordeum vulgare subsp. Vulgare]                           |
| Ta_S58851470 | 29.3 | 0.008616 | Not found                                                                    |
| Ta_S37803822 | 28.8 | 0.049691 | Upf0481 protein at3g47200-like                                               |
| Ta_S58855143 | 23.4 | 0.005618 | Pentatricopeptide repeat-containing protein                                  |
| Ta_S32562131 | 22.0 | 0.006854 | Not found                                                                    |
| Ta_S13041446 | 20.0 | 0.036236 | Not found                                                                    |
| Ta_S58888744 | 19.4 | 0.011021 | Not found                                                                    |
| Ta_S13119248 | 18.9 | 0.03781  | Not found                                                                    |
| Ta_S58893909 | 18.8 | 0.01346  | Not found                                                                    |
| Ta_S58842447 | 17.9 | 0.016019 | PREDICTED: uncharacterized protein LOC100837593<br>[Brachypodium distachyon] |
| Ta_S13132385 | 17.4 | 0.005321 | Like protein                                                                 |
| Ta_S58862139 | 16.2 | 0.017777 | Not found                                                                    |
| Ta_S58869437 | 15.7 | 0.001733 | Not found                                                                    |
| Ta_S58865123 | 15.2 | 0.002555 | Not found                                                                    |
| Ta_S58894064 | 15.1 | 0.022629 | Tvp38 tmem64 family membrane protein slr0305-like                            |
| Ta_S58863212 | 14.9 | 0.042984 | Not found                                                                    |
| Ta_S50387228 | 14.3 | 0.020233 | Not found                                                                    |
| Ta_S58846533 | 14.3 | 0.041675 | Nodulin-like protein                                                         |
| Ta_S13180058 | 13.8 | 0.038596 | Not found                                                                    |
| Ta_S58854706 | 13.2 | 0.007929 | Bwf1-like protein                                                            |
| contig_2145  | 12.9 | 0.000596 | Elongation factor ts                                                         |
| Ta_S58866498 | 11.9 | 0.011321 | Not found                                                                    |
| contig_6805  | 11.4 | 0.00084  | Not found                                                                    |
| Ta_S37854435 | 11.4 | 0.000559 | Anthocyanidin -o-glucosyltransferase-like                                    |
| contig_6985  | 10.1 | 0.000141 | Hypothetical protein SORBIDRAFT_03g008680 [Sorghum bicolor]                  |
| Ta_S58845691 | 9.9  | 0.033479 | Mutant low phytic acid protein 1                                             |
| Ta_S58849116 | 9.8  | 0.008202 | Not found                                                                    |
| Ta_S16231538 | 9.5  | 0.000544 | PREDICTED: uncharacterized protein LOC100841809<br>[Brachypodium distachyon] |
| Ta_S58865733 | 9.1  | 0.010126 | Hypothetical protein osj_31200 [Oryza sativa Japonica Group]                 |
| Ta_S58896701 | 9.0  | 0.007022 | Not found                                                                    |
| contig_6324  | 8.9  | 0.032258 | Protein yeez                                                                 |

|              |     |          |                                                                              |
|--------------|-----|----------|------------------------------------------------------------------------------|
| Ta_S12913717 | 8.8 | 0.00634  | Dna-directed rna polymerases i and iii subunit rpac1-like                    |
| Ta_S12882577 | 8.6 | 0.009406 | Ring-h2 finger protein atl1n precursor                                       |
| contig_1201  | 8.5 | 0.01555  | Not found                                                                    |
| Ta_S58848010 | 8.1 | 0.02126  | Not found                                                                    |
| contig_1642  | 8.0 | 0.041335 | PREDICTED: uncharacterized protein LOC100826907<br>[Brachypodium distachyon] |
| Ta_S32622948 | 7.9 | 0.000312 | Late embryogenesis abundant protein                                          |
| Ta_S13014352 | 7.8 | 0.017039 | Protein suppressor of gene silencing-like protein                            |
| contig_6887  | 7.7 | 0.000537 | Not found                                                                    |
| Ta_S58858052 | 7.7 | 0.019978 | PREDICTED: uncharacterized protein LOC100829225<br>[Brachypodium distachyon] |
| Ta_S13119076 | 7.7 | 0.027102 | Predicted protein [Hordeum vulgare subsp. Vulgare]                           |
| Ta_S58909995 | 7.7 | 0.002892 | Bzip transcription factor family expressed                                   |
| contig_2040  | 7.7 | 0.002061 | Transferring glycosyl                                                        |
| Ta_S17979419 | 7.5 | 0.019694 | Dna ligase-like                                                              |
| Ta_S16246857 | 7.3 | 0.006151 | Disease resistance protein rpm1-like                                         |
| Ta_S13183409 | 7.2 | 0.00982  | Not found                                                                    |
| Ta_S32568379 | 7.2 | 0.002987 | Not found                                                                    |
| Ta_S58847149 | 7.0 | 0.009853 | Not found                                                                    |
| Ta_S13012191 | 6.9 | 0.02941  | Predicted protein [Hordeum vulgare subsp. Vulgare]                           |
| Ta_S13262842 | 6.9 | 0.014523 | PREDICTED: uncharacterized protein LOC100827899<br>[Brachypodium distachyon] |
| contig_5628  | 6.8 | 0.023393 | Cytochrome c heme attachment protein                                         |
| Ta_S58839265 | 6.7 | 0.003925 | Not found                                                                    |
| contig_2680  | 6.7 | 0.015497 | PREDICTED: uncharacterized protein LOC100827734<br>[Brachypodium distachyon] |
| Ta_S58882413 | 6.6 | 0.000605 | Protein                                                                      |
| Ta_S12957883 | 6.5 | 0.025181 | Not found                                                                    |
| contig_4166  | 6.4 | 0.009352 | Not found                                                                    |
| Ta_S58888286 | 6.4 | 0.002662 | Protein chloroplast import apparatus 2-like                                  |
| contig_1287  | 6.4 | 0.036626 | Protein ddb_g0268328-like                                                    |
| Ta_S58852095 | 6.4 | 0.012195 | Not found                                                                    |
| contig_3460  | 6.3 | 0.04975  | Not found                                                                    |

|              |     |          |                                                                                        |
|--------------|-----|----------|----------------------------------------------------------------------------------------|
| Ta_S58909884 | 6.3 | 0.007486 | PREDICTED: uncharacterized protein LOC100826789 isoform 2<br>[Brachypodium distachyon] |
| Ta_S58889807 | 6.2 | 0.039403 | Global transcription factor group                                                      |
| contig_2233  | 6.2 | 7.39E-05 | Not found                                                                              |
| Ta_S58847793 | 6.2 | 0.008982 | Not found                                                                              |
| Ta_S13179757 | 6.1 | 0.002234 | Not found                                                                              |
| contig_6194  | 6.0 | 0.000574 | Protein furry homolog-like                                                             |
| Ta_S12894932 | 5.9 | 0.003389 | Vip3 protein                                                                           |
| Ta_S58894572 | 5.9 | 0.028102 | Not found                                                                              |
| contig_506   | 5.8 | 4.72E-05 | Rna polymerase beta subunit                                                            |
| Ta_S58841053 | 5.8 | 0.039817 | Not found                                                                              |
| Ta_S58890145 | 5.8 | 0.010066 | L-asparaginase                                                                         |
| contig_6486  | 5.8 | 0.011558 | Not found                                                                              |
| Ta_S58855771 | 5.7 | 0.037754 | Not found                                                                              |
| Ta_S13111509 | 5.7 | 0.024983 | Calmodulin                                                                             |
| Ta_S16248415 | 5.7 | 0.010506 | Not found                                                                              |
| Ta_S52543421 | 5.6 | 0.002692 | Protein                                                                                |
| contig_6115  | 5.5 | 0.011847 | Cytochrome c biogenesis protein precursor                                              |
| contig_1932  | 5.5 | 0.032824 | Zinc finger-like                                                                       |
| Ta_S32564414 | 5.5 | 0.016276 | Predicted protein [Hordeum vulgare subsp. Vulgare]                                     |
| Ta_S19116911 | 5.5 | 0.017142 | Fca protein                                                                            |
| Ta_S26025255 | 5.4 | 0.012003 | Photosystem ii reaction center w protein                                               |
| Ta_S13179255 | 5.3 | 0.017007 | Not found                                                                              |
| Ta_S32565615 | 5.2 | 0.00308  | Not found                                                                              |
| contig_6267  | 5.1 | 8.63E-05 | Not found                                                                              |
| contig_1068  | 5.1 | 0.00032  | Not found                                                                              |
| Ta_S58884786 | 5.0 | 0.034851 | Flavonol 3-sulfotransferase                                                            |
| Ta_S13043420 | 5.0 | 0.01845  | Protein                                                                                |
| Ta_S52545275 | 4.9 | 0.008435 | Ulp1+protease+family [Oryza glaberrima]                                                |
| Ta_S13137206 | 4.9 | 0.021794 | Not found                                                                              |
| Ta_S59490003 | 4.9 | 0.040244 | Myb transcription factor                                                               |
| Ta_S58907457 | 4.9 | 0.000209 | Predicted protein [Hordeum vulgare subsp. Vulgare]                                     |
| Ta_S26023560 | 4.8 | 0.014513 | Not found                                                                              |

|              |     |          |                                                                              |
|--------------|-----|----------|------------------------------------------------------------------------------|
| Ta_S16213897 | 4.8 | 0.014501 | Insulin-degrading enzyme-like                                                |
| Ta_S17978397 | 4.7 | 0.049031 | Casp-like protein stg-like                                                   |
| Ta_S58890169 | 4.7 | 0.017786 | Fk506 binding protein                                                        |
| contig_3086  | 4.7 | 9.64E-05 | Coiled-coil domain-containing protein 132-like                               |
| Ta_S58886646 | 4.7 | 0.016325 | Phytosulfokines 2-like                                                       |
| Ta_S53281796 | 4.6 | 0.004466 | Partial                                                                      |
| Ta_S13194862 | 4.6 | 0.034102 | Not found                                                                    |
| Ta_S32671427 | 4.6 | 0.00369  | Not found                                                                    |
| Ta_S37850818 | 4.6 | 0.047891 | Blue copper binding protein                                                  |
| contig_387   | 4.5 | 0.015073 | Peroxidase 1 precursor                                                       |
| contig_1359  | 4.5 | 0.007121 | Not found                                                                    |
| Ta_S58869803 | 4.5 | 0.022403 | Something about silencing protein                                            |
| Ta_S58885579 | 4.5 | 0.013609 | Retrotransposon ty3-gypsy expressed                                          |
| Ta_S58886383 | 4.5 | 0.038333 | Not found                                                                    |
| Ta_S58895529 | 4.4 | 0.013951 | Probable fructokinase-1-like                                                 |
| Ta_S58853931 | 4.4 | 0.004754 | Not found                                                                    |
| contig_3430  | 4.4 | 0.035664 | PREDICTED: uncharacterized protein LOC100835632<br>[Brachypodium distachyon] |
| Ta_S58854350 | 4.4 | 0.003766 | Not found                                                                    |
| Ta_S16199865 | 4.4 | 0.005065 | Predicted protein [Hordeum vulgare subsp. Vulgare]                           |
| Ta_S58839592 | 4.4 | 0.022398 | Not found                                                                    |
| Ta_S52543823 | 4.4 | 0.014655 | Glycolate oxidase                                                            |
| Ta_S37845220 | 4.3 | 0.027409 | Predicted protein [Hordeum vulgare subsp. Vulgare]                           |
| Ta_S16203218 | 4.3 | 0.031188 | G-patch domain containing protein                                            |
| Ta_S58845015 | 4.3 | 0.035904 | Not found                                                                    |
| Ta_S13194190 | 4.3 | 0.008729 | Not found                                                                    |
| Ta_S32602541 | 4.3 | 0.035606 | Wrky45-like transcription factor                                             |
| Ta_S52541979 | 4.3 | 0.005915 | Mazg nucleotide pyrophosphohydrolase domain protein                          |
| contig_6543  | 4.2 | 0.024677 | Abc transporter g family member 16-like                                      |
| contig_4210  | 4.2 | 0.003053 | Not found                                                                    |
| contig_2469  | 4.1 | 0.0154   | Not found                                                                    |
| contig_6647  | 4.1 | 0.022231 | Not found                                                                    |
| Ta_S58856084 | 4.0 | 0.006992 | Protein raspberry 3                                                          |

|              |     |          |                                                                              |
|--------------|-----|----------|------------------------------------------------------------------------------|
| contig_2463  | 4.0 | 0.020513 | Nac domain-containing protein 21 22-like                                     |
| Ta_S52546230 | 4.0 | 0.02679  | Predicted protein [Hordeum vulgare subsp. Vulgare]                           |
| Ta_S55352938 | 4.0 | 0.042183 | Not found                                                                    |
| Ta_S58894026 | 4.0 | 0.006073 | Protein mei2-like 2-like                                                     |
| Ta_S32564964 | 4.0 | 0.015267 | Lob domain-containing protein 12-like                                        |
| Ta_S18008276 | 4.0 | 0.02317  | Metallothionein                                                              |
| contig_4435  | 3.9 | 0.001184 | Not found                                                                    |
| Ta_S52542038 | 3.9 | 0.011996 | Not found                                                                    |
| contig_3797  | 3.9 | 0.047636 | Not found                                                                    |
| Ta_S58857043 | 3.9 | 0.046382 | Not found                                                                    |
| Ta_S13011770 | 3.9 | 0.016041 | Response regulator receiver domain containing expressed                      |
| Ta_S32529059 | 3.9 | 0.044464 | P-glycoprotein 1                                                             |
| Ta_S58862129 | 3.9 | 0.015591 | Ubiquitin carboxyl-terminal hydrolase 5-like                                 |
| contig_6139  | 3.9 | 0.017725 | PREDICTED: uncharacterized protein LOC100830293<br>[Brachypodium distachyon] |
| Ta_S37773901 | 3.9 | 0.020961 | Cytochrome p450                                                              |
| contig_4099  | 3.9 | 0.011792 | Not found                                                                    |
| Ta_S58884172 | 3.8 | 0.019041 | Sugar transporter family expressed                                           |
| Ta_S26022483 | 3.8 | 0.004652 | Mrna turnover protein 4 homolog                                              |
| contig_2117  | 3.8 | 0.036091 | Protein far1-related sequence 6-like                                         |
| Ta_S58900106 | 3.8 | 0.036143 | Light-harvesting complex i chlorophyll a b binding protein 3                 |
| contig_177   | 3.8 | 0.021501 | Not found                                                                    |
| Ta_S22370925 | 3.7 | 0.028464 | Cyclin-dependent protein                                                     |
| contig_4121  | 3.7 | 0.003503 | Nadh-plastoquinone oxidoreductase subunit 4                                  |
| contig_189   | 3.6 | 0.002803 | Hydroxypyruvate reductase                                                    |
| contig_3206  | 3.6 | 0.01727  | Not found                                                                    |
| contig_1921  | 3.6 | 0.031429 | Not found                                                                    |
| Ta_S17057489 | 3.6 | 0.012101 | Auxin response factor 3-like                                                 |
| Ta_S37847348 | 3.6 | 0.046873 | Not found                                                                    |
| contig_6073  | 3.6 | 0.000429 | Not found                                                                    |
| Ta_S17984780 | 3.6 | 0.038704 | Rna recognition motif-containing protein                                     |
| Ta_S58847292 | 3.6 | 0.044602 | Not found                                                                    |
| Ta_S17990036 | 3.5 | 0.012441 | Os01g67210-like protein                                                      |



|              |     |          |                                                                              |
|--------------|-----|----------|------------------------------------------------------------------------------|
| contig_4485  | 3.5 | 0.011469 | Protein                                                                      |
| contig_34    | 3.5 | 0.007414 | Ac079179_7 dna2-nam7 helicase family protein                                 |
| Ta_S13192404 | 3.5 | 0.002451 | Not found                                                                    |
| contig_5565  | 3.5 | 0.013811 | Not found                                                                    |
| Ta_S16265918 | 3.5 | 0.034256 | Not found                                                                    |
| contig_6371  | 3.5 | 0.003753 | Cleavage and polyadenylation specificity factor subunit 1-like               |
| contig_5623  | 3.5 | 0.015428 | Not found                                                                    |
| Ta_S32623645 | 3.5 | 0.005422 | Not found                                                                    |
| contig_4508  | 3.5 | 0.026426 | Not found                                                                    |
| contig_3771  | 3.5 | 0.045802 | Not found                                                                    |
| Ta_S13051479 | 3.4 | 0.02613  | Serine threonine-protein kinase afc1                                         |
| contig_667   | 3.4 | 0.007296 | Glucan endo- -beta-glucosidase 3 precursor                                   |
| Ta_S13158111 | 3.4 | 0.038946 | 3 -n-debenzoyl-2 -deoxytaxol n-benzoyltransferase-like                       |
| contig_6266  | 3.4 | 0.026402 | PREDICTED: uncharacterized protein LOC100846531<br>[Brachypodium distachyon] |
| Ta_S22368361 | 3.4 | 0.030739 | Not found                                                                    |
| Ta_S17985298 | 3.4 | 0.030577 | Os03g0806600 [Oryza sativa Japonica Group]                                   |
| contig_6429  | 3.4 | 0.001115 | Atp-dependent clp protease atp-binding subunit -like                         |
| contig_5972  | 3.4 | 0.036929 | Kinesin-like protein                                                         |
| contig_6711  | 3.4 | 0.001579 | Ring finger protein 10-like                                                  |
| contig_1657  | 3.4 | 0.001289 | PREDICTED: uncharacterized protein LOC100833724<br>[Brachypodium distachyon] |
| contig_4494  | 3.4 | 0.004922 | Adomet-dependent rrna methyltransferase spb1-like                            |
| Ta_S35718003 | 3.3 | 0.034433 | Cbf protein 4                                                                |
| contig_2829  | 3.3 | 0.016477 | Disease resistance protein rpp13-like                                        |
| Ta_S52544017 | 3.3 | 0.000181 | Os11g0205500 [Oryza sativa Japonica Group]                                   |
| Ta_S52541619 | 3.3 | 0.003758 | Predicted protein [Hordeum vulgare subsp. Vulgare]                           |
| contig_976   | 3.3 | 0.017469 | Not found                                                                    |
| Ta_S32680735 | 3.3 | 0.046318 | Atp-dependent helicase                                                       |
| contig_893   | 3.3 | 0.026324 | Hypothetical protein SORBIDRAFT_02g042020 [Sorghum bicolor]                  |
| contig_7150  | 3.3 | 0.043671 | Pectinacetylerase precursor                                                  |
| contig_5790  | 3.3 | 0.00218  | Atp gtp binding protein                                                      |
| Ta_S12937455 | 3.3 | 0.02511  | Caffeic acid 3-o-methyltransferase                                           |

|              |     |          |                                                         |
|--------------|-----|----------|---------------------------------------------------------|
| contig_6028  | 3.3 | 0.047501 | Zinc finger-like                                        |
| contig_6790  | 3.2 | 0.002154 | Not found                                               |
| Ta_S58885047 | 3.2 | 0.043247 | Required to maintain repression 1                       |
| contig_1204  | 3.2 | 0.020006 | Not found                                               |
| Ta_S58890225 | 3.2 | 0.032208 | Pinus taeda anonymous locus 0_13978_01 genomic sequence |
| Ta_S58892307 | 3.2 | 0.036361 | Protein                                                 |
| Ta_S12978479 | 3.2 | 0.025629 | Upf0503 protein chloroplastic-like                      |
| Ta_S52544593 | 3.2 | 0.008103 | laa amidohydrolase                                      |
| Ta_S58891200 | 3.2 | 0.049555 | Probable calcium-binding protein cml45-like             |
| Ta_S58843579 | 3.2 | 0.012423 | Zinc finger c-x8-c-x5-c-x3-h type family protein        |
| contig_5459  | 3.2 | 0.0118   | Not found                                               |
| contig_6622  | 3.2 | 0.033575 | Predicted protein [Hordeum vulgare subsp. Vulgare]      |
| contig_1887  | 3.2 | 0.029589 | Nadh-plastoquinone oxidoreductase subunit i             |
| contig_1450  | 3.1 | 0.024256 | Not found                                               |
| contig_6247  | 3.1 | 0.031666 | Ubiquitin-protein pub49                                 |
| contig_5892  | 3.1 | 0.03285  | Tgf-beta type i ii extracellular region                 |
| Ta_S32611416 | 3.1 | 0.002956 | Not found                                               |
| contig_1268  | 3.1 | 0.004966 | Pre-mrna-processing factor 6-like                       |
| Ta_S58848668 | 3.1 | 0.022083 | Protein                                                 |
| Ta_S58839681 | 3.1 | 0.005448 | Molybdopterin cofactor                                  |
| Ta_S52543429 | 3.1 | 0.048621 | Far-red impaired response                               |
| contig_510   | 3.1 | 0.016319 | Not found                                               |
| contig_3567  | 3.1 | 0.046643 | Histidine kinase 1                                      |
| Ta_S12898462 | 3.1 | 0.048414 | Not found                                               |
| contig_595   | 3.1 | 0.016907 | Not found                                               |
| Ta_S16213725 | 3.1 | 0.024768 | Not found                                               |
| contig_206   | 3.1 | 0.040605 | Wall-associated receptor kinase 3-like                  |
| Ta_S52541449 | 3.1 | 0.015366 | Acc oxidase                                             |
| Ta_S58855004 | 3.0 | 0.022203 | Retrotransposon unclassified                            |
| Ta_S52541238 | 3.0 | 0.036684 | Protein                                                 |
| Ta_S58908965 | 3.0 | 0.04018  | Not found                                               |
| contig_4372  | 3.0 | 0.010219 | PREDICTED: uncharacterized protein LOC100830560         |

[Brachypodium distachyon]

|              |     |          |                                                                                                                 |
|--------------|-----|----------|-----------------------------------------------------------------------------------------------------------------|
| contig_6211  | 3.0 | 0.023654 | Not found                                                                                                       |
| contig_1319  | 3.0 | 0.001602 | Protein                                                                                                         |
| Ta_S58849836 | 3.0 | 0.019897 | Transposon en spm sub-class                                                                                     |
| Ta_S12971695 | 3.0 | 0.038384 | Not found                                                                                                       |
| Ta_S52545353 | 3.0 | 0.026062 | Gene product                                                                                                    |
| contig_2007  | 3.0 | 0.002687 | S-locus protein 4                                                                                               |
| contig_4736  | 3.0 | 0.04582  | Transparent testa 12 protein                                                                                    |
| contig_4368  | 3.0 | 0.025215 | Pleckstrin homology domain-containing protein                                                                   |
| Ta_S58863463 | 3.0 | 0.044705 | Not found                                                                                                       |
| contig_1928  | 3.0 | 0.003062 | Protein kinase                                                                                                  |
| Ta_S58850183 | 3.0 | 0.043876 | Protein rrp5 homolog                                                                                            |
| Ta_S32571600 | 3.0 | 0.019429 | Aaa atpase containing von willebrand factor type a precursor                                                    |
| Ta_S26018764 | 3.0 | 0.028686 | Not found                                                                                                       |
| Ta_S16207731 | 2.9 | 0.024887 | Aspartic proteinase nepenthesin-1-like                                                                          |
| Ta_S37827906 | 2.9 | 0.039072 | Not found                                                                                                       |
| contig_6944  | 2.9 | 0.011773 | Not found                                                                                                       |
| contig_5588  | 2.9 | 0.040374 | Auxilin-related protein 2-like                                                                                  |
| contig_1953  | 2.9 | 0.006278 | Not found                                                                                                       |
| contig_3846  | 2.9 | 0.002502 | Not found                                                                                                       |
| Ta_S22381029 | 2.9 | 0.03341  | Cytochrome p450                                                                                                 |
| Ta_S16262691 | 2.9 | 0.024578 | Predicted protein [Hordeum vulgare subsp. Vulgare]                                                              |
| contig_4488  | 2.8 | 0.042037 | Not found                                                                                                       |
| Ta_S17897290 | 2.8 | 0.003737 | Nascent polypeptide associated complex alpha chain                                                              |
| Ta_S26023404 | 2.8 | 0.041541 | Plastid protein                                                                                                 |
| contig_1298  | 2.8 | 0.035525 | Low quality protein: 1-phosphatidylinositol-3-phosphate 5-kinase-like                                           |
| Ta_S26026252 | 2.8 | 0.027495 | 50s ribosomal protein I9                                                                                        |
| Ta_S17987500 | 2.8 | 0.043801 | Cytochrome p450 probable 6-deoxoteasterone to 3-dehydro 6-deoxoteasterone or teasterone to 3-dehydro teasterone |
| contig_85    | 2.8 | 0.018126 | Not found                                                                                                       |
| Ta_S26022199 | 2.8 | 0.038098 | Not found                                                                                                       |
| contig_6724  | 2.8 | 0.03668  | Os05g0207900 [Oryza sativa Japonica Group]                                                                      |
| contig_2320  | 2.8 | 0.00944  | Not found                                                                                                       |

|              |     |          |                                                                              |
|--------------|-----|----------|------------------------------------------------------------------------------|
| Ta_S58849094 | 2.8 | 0.036562 | Not found                                                                    |
| contig_1882  | 2.8 | 0.026119 | Not found                                                                    |
| contig_2188  | 2.8 | 0.028778 | Dynamin-like protein                                                         |
| Ta_S58907153 | 2.8 | 0.045212 | Post-illumination chlorophyll fluorescence increase protein                  |
| Ta_S32591420 | 2.8 | 0.026478 | C-terminal zinc-finger                                                       |
| Ta_S17988916 | 2.8 | 0.00575  | Probable atp-dependent rna helicase dhx36-like                               |
| contig_1923  | 2.8 | 0.012786 | Not found                                                                    |
| contig_1955  | 2.8 | 0.049442 | Not found                                                                    |
| Ta_S18012554 | 2.8 | 0.043176 | At5g16250 t21h19_170                                                         |
| Ta_S12880675 | 2.7 | 0.019579 | Af385697_1 at5g10580 f12b17_70                                               |
| contig_4145  | 2.7 | 0.046526 | Not found                                                                    |
| Ta_S58886363 | 2.7 | 0.013311 | Stearoyl-acyl-carrier protein desaturase                                     |
| Ta_S32628058 | 2.7 | 0.014778 | Protein mitochondrial-like                                                   |
| Ta_S37846208 | 2.7 | 0.015742 | Anthocyanidin -o-glucosyltransferase-like                                    |
| Ta_S58902249 | 2.7 | 0.032019 | Not found                                                                    |
| Ta_S16058277 | 2.7 | 0.003438 | Cinnamyl alcohol dehydrogenase                                               |
| contig_4117  | 2.7 | 0.028115 | Not found                                                                    |
| Ta_S58888109 | 2.7 | 0.015363 | Tpa: nac transcription factor                                                |
| Ta_S52545220 | 2.7 | 0.024114 | Chloroplast omega-6 fatty acid desaturase                                    |
| Ta_S58900624 | 2.7 | 0.028533 | Serine hydroxymethyltransferase                                              |
| contig_4744  | 2.7 | 0.043444 | Probable fructokinase-2                                                      |
| Ta_S58885157 | 2.7 | 0.007421 | Retrotransposon expressed                                                    |
| Ta_S37889954 | 2.7 | 0.038063 | Not found                                                                    |
| contig_5322  | 2.7 | 0.005918 | Not found                                                                    |
| Ta_S32537167 | 2.7 | 0.033359 | Not found                                                                    |
| Ta_S58861966 | 2.7 | 0.044648 | Diacylglycerol acyltransferase                                               |
| Ta_S26027242 | 2.7 | 0.026064 | Chaperonin 20                                                                |
| contig_5307  | 2.7 | 0.01233  | PREDICTED: uncharacterized protein LOC100838094<br>[Brachypodium distachyon] |
| contig_132   | 2.7 | 0.01751  | Not found                                                                    |
| contig_7151  | 2.7 | 0.015553 | Not found                                                                    |
| contig_347   | 2.7 | 0.005414 | Not found                                                                    |
| Ta_S58863091 | 2.7 | 0.022328 | Not found                                                                    |

|              |     |          |                                                                                |
|--------------|-----|----------|--------------------------------------------------------------------------------|
| contig_2278  | 2.7 | 0.037931 | Predicted protein [Hordeum vulgare subsp. Vulgare]                             |
| Ta_S17987196 | 2.7 | 0.03366  | Alpha 3 subunit of 20s proteasome                                              |
| Ta_S13179831 | 2.7 | 0.0085   | Not found                                                                      |
| contig_179   | 2.7 | 0.027104 | Choline ethanolamine kinase                                                    |
| Ta_S52543551 | 2.7 | 0.010257 | Basic region leucine zipper protein                                            |
| contig_4596  | 2.7 | 0.027564 | Protein kinase and pp2c-like domain-containing isoform 2                       |
| contig_2341  | 2.6 | 0.004378 | Not found                                                                      |
| Ta_S32661131 | 2.6 | 0.011714 | Wir1b_wheat ame: full=protein wir1b                                            |
| Ta_S58865460 | 2.6 | 0.031304 | Aaa family atpase cdc48 subfamily                                              |
| Ta_S58904389 | 2.6 | 0.017919 | Clp-like energy-dependent protease                                             |
| contig_3754  | 2.6 | 0.047926 | Not found                                                                      |
| contig_5733  | 2.6 | 0.041474 | Not found                                                                      |
| Ta_S58855639 | 2.6 | 0.037345 | Not found                                                                      |
| Ta_S58850763 | 2.6 | 0.048262 | PREDICTED: uncharacterized protein At2g39910-like<br>[Brachypodium distachyon] |
| Ta_S26022932 | 2.6 | 0.035619 | Grassy tillers 1                                                               |
| Ta_S52546220 | 2.6 | 0.038764 | Tonoplast intrinsic                                                            |
| contig_3687  | 2.6 | 0.020669 | Not found                                                                      |
| Ta_S32660720 | 2.6 | 0.038125 | Not found                                                                      |
| Ta_S58902262 | 2.6 | 0.00681  | Tonoplast intrinsic protein                                                    |
| Ta_S58853104 | 2.6 | 0.044161 | Probable lrr receptor-like serine threonine-protein kinase<br>at3g47570-like   |
| contig_1468  | 2.6 | 0.007515 | Not found                                                                      |
| contig_3564  | 2.6 | 0.028809 | Not found                                                                      |
| Ta_S58850272 | 2.5 | 0.044373 | Not found                                                                      |
| Ta_S58867334 | 2.5 | 0.044755 | 1 domain containing expressed                                                  |
| contig_2492  | 2.5 | 0.048355 | Rna polymerase beta partial                                                    |
| contig_1864  | 2.5 | 0.029312 | Probable atp-dependent rna helicase ythdc2-like                                |
| contig_5660  | 2.5 | 0.041875 | Not found                                                                      |
| Ta_S13567817 | 2.5 | 0.02858  | Rubisco subunit binding-protein alpha subunit                                  |
| contig_5786  | 2.5 | 0.00571  | Not found                                                                      |
| Ta_S13137675 | 2.5 | 0.024318 | Not found                                                                      |
| Ta_S26018735 | 2.5 | 0.033949 | Ribosome biogenesis protein bop1 homolog                                       |

|              |     |          |                                                                              |
|--------------|-----|----------|------------------------------------------------------------------------------|
| Ta_S52546131 | 2.5 | 0.049751 | Not found                                                                    |
| contig_1896  | 2.5 | 0.003622 | Not found                                                                    |
| Ta_S12922871 | 2.5 | 0.012976 | Nucleic acid-binding protein                                                 |
| Ta_S22391033 | 2.5 | 0.040161 | Ser thr-rich protein t10 in dgcr region                                      |
| Ta_S18012285 | 2.5 | 0.009965 | Not found                                                                    |
| Ta_S52545881 | 2.5 | 0.022684 | Anthocyanin 5-aromatic acyltransferase-like                                  |
| Ta_S24513426 | 2.5 | 0.046717 | G1-like3 protein                                                             |
| contig_7038  | 2.5 | 0.04571  | Argininosuccinate lyase                                                      |
| Ta_S58853020 | 2.5 | 0.045993 | PREDICTED: uncharacterized protein LOC100833596<br>[Brachypodium distachyon] |
| Ta_S32541082 | 2.5 | 0.039925 | Not found                                                                    |
| Ta_S13205638 | 2.4 | 0.017913 | Not found                                                                    |
| contig_1250  | 2.4 | 0.00939  | Not found                                                                    |
| contig_4290  | 2.4 | 0.006712 | Not found                                                                    |
| Ta_S13049499 | 2.4 | 0.030413 | Non-specific lipid-transfer protein at2g13820-like                           |
| contig_1177  | 2.4 | 0.04838  | Not found                                                                    |
| contig_5852  | 2.4 | 0.00586  | Importin subunit beta-1-like                                                 |
| contig_956   | 2.4 | 0.028589 | Not found                                                                    |
| Ta_S12923244 | 2.4 | 0.009896 | Ribulose -bisphosphate carboxylase activase                                  |
| contig_6317  | 2.4 | 0.035749 | Not found                                                                    |
| Ta_S13163819 | 2.4 | 0.036475 | Predicted protein [Hordeum vulgare subsp. Vulgare]                           |
| Ta_S37811723 | 2.4 | 0.028953 | Not found                                                                    |
| Ta_S58886850 | 2.4 | 0.015067 | Apurinic endonuclease-redox protein                                          |
| Ta_S26020605 | 2.3 | 0.003917 | Not found                                                                    |
| Ta_S58855596 | 2.3 | 0.025724 | Protein nlr3-like                                                            |
| Ta_S17987082 | 2.3 | 0.020748 | Aquaporin tip4-1                                                             |
| Ta_S17890271 | 2.3 | 0.039185 | H+ ca2+ exchanger                                                            |
| Ta_S26025478 | 2.3 | 0.02849  | Dehydrin 5                                                                   |
| Ta_S52547012 | 2.3 | 0.016971 | 1-aminocyclopropane-1-carboxylate oxidase homolog 1-like                     |
| Ta_S17987611 | 2.3 | 0.030724 | Protein kinase chloroplast                                                   |
| contig_1672  | 2.3 | 0.006677 | Predicted protein [Hordeum vulgare subsp. Vulgare]                           |
| Ta_S58896564 | 2.3 | 0.037143 | Not found                                                                    |
| Ta_S17987213 | 2.3 | 0.046563 | Rna polymerase beta subunit                                                  |

|              |     |          |                                                                |
|--------------|-----|----------|----------------------------------------------------------------|
| contig_3666  | 2.3 | 0.025692 | Calcium-dependent protein kinase                               |
| contig_2386  | 2.3 | 0.043744 | Type i inositol- -trisphosphate 5-phosphatase cvp2-like        |
| contig_4893  | 2.3 | 0.025021 | Not found                                                      |
| contig_329   | 2.3 | 0.01921  | Not found                                                      |
| contig_4     | 2.3 | 0.041515 | Nadh dehydrogenase subunit 2                                   |
| contig_6090  | 2.3 | 0.041248 | Abscisic acid receptor pyl8-like                               |
| Ta_S22381224 | 2.3 | 0.044987 | Potassium transporter 25-like                                  |
| Ta_S17889976 | 2.3 | 0.036853 | Chlorophyll a b binding protein                                |
| Ta_S50379630 | 2.3 | 0.036224 | Casp-like protein at3g53850-like                               |
| Ta_S13232890 | 2.3 | 0.016033 | Adp-ribosylation factor                                        |
| Ta_S22368999 | 2.3 | 0.038426 | Not found                                                      |
| contig_984   | 2.2 | 0.038863 | Not found                                                      |
| contig_4802  | 2.2 | 0.025676 | Ap-2 complex subunit sigma-like                                |
| Ta_S17888862 | 2.2 | 0.014477 | Cysteine-rich repeat secretory protein 55-like                 |
| Ta_S58842296 | 2.2 | 0.045837 | Copine (calcium-dependent phospholipid-binding protein) family |
| Ta_S35138743 | 2.2 | 0.014374 | Fasciclin-like arabinogalactan protein 11-like                 |
| Ta_S52546553 | 2.2 | 0.001782 | Subtilisin-like protease                                       |
| contig_3386  | 2.2 | 0.012737 | Heavy metal p-type atpase                                      |
| contig_1812  | 2.2 | 0.026186 | Not found                                                      |
| contig_264   | 2.2 | 0.044341 | O-methyltransferase family expressed                           |
| Ta_S26019852 | 2.2 | 0.033632 | Not found                                                      |
| Ta_S58897752 | 2.2 | 0.04849  | Not found                                                      |
| Ta_S13127316 | 2.2 | 0.028718 | Predicted protein [Hordeum vulgare subsp. Vulgare]             |
| contig_1333  | 2.2 | 0.047689 | Nadh-plastoquinone oxidoreductase subunit 4                    |
| Ta_S22390999 | 2.2 | 0.032546 | Not found                                                      |
| Ta_S52542749 | 2.2 | 0.015284 | Hexokinase 2                                                   |
| contig_300   | 2.2 | 0.026097 | Kelch motif family protein                                     |
| Ta_S17988496 | 2.2 | 0.002513 | Sex determination protein tasselseed 2                         |
| Ta_S17989302 | 2.2 | 0.042233 | Adenylate kinase                                               |
| Ta_S16203131 | 2.2 | 0.046073 | Ribosomal protein l29 family protein                           |
| Ta_S58884885 | 2.2 | 0.041543 | Predicted protein [Hordeum vulgare subsp. Vulgare]             |
| Ta_S17890391 | 2.2 | 0.031877 | Vacuolar sorting receptor 1 expressed                          |
| Ta_S58863494 | 2.1 | 0.044972 | Retrotransposon protein                                        |

|              |     |          |                                                                                   |
|--------------|-----|----------|-----------------------------------------------------------------------------------|
| contig_4909  | 2.1 | 0.006443 | Not found                                                                         |
| Ta_S37822414 | 2.1 | 0.034591 | Pentatricopeptide repeat-containing protein                                       |
| Ta_S52544010 | 2.1 | 0.045153 | 3 -n-debenzoyl-2 -deoxytaxol n-benzoyltransferase-like                            |
| contig_2559  | 2.1 | 0.042846 | At1g03060-like partial                                                            |
| Ta_S13110644 | 2.1 | 0.019238 | Not found                                                                         |
| Ta_S17888161 | 2.1 | 0.031418 | Chlorophyll a-b binding protein of lhci type iii                                  |
| Ta_S37752627 | 2.1 | 0.006329 | Not found                                                                         |
| Ta_S26023930 | 2.1 | 0.027836 | High mobility group b protein 7-like                                              |
| Ta_S26027971 | 2.1 | 0.037103 | Calmodulin-like protein 6-like                                                    |
| Ta_S32686907 | 2.1 | 0.008878 | Not found                                                                         |
| contig_6052  | 2.1 | 0.042806 | Uncharacterized membrane protein at1g16860-like                                   |
| contig_1648  | 2.1 | 0.024846 | Isoleucyl-trna cytoplasmic-like                                                   |
| Ta_S53111501 | 2.1 | 0.037225 | Uncharacterized cdp-alcohol phosphatidyltransferase class-i family protein 3-like |
| Ta_S12926531 | 2.1 | 0.03622  | Deoxyuridine 5 -triphosphate nucleotidohydrolase                                  |
| Ta_S58893991 | 2.1 | 0.020919 | Receptor-like protein kinase feronia-like                                         |
| contig_2368  | 2.1 | 0.035919 | Not found                                                                         |
| contig_1504  | 2.1 | 0.03768  | E3 ubiquitin-protein ligase rnf14-like                                            |
| contig_1845  | 2.1 | 0.008551 | Not found                                                                         |
| contig_1554  | 2.1 | 0.046294 | Actin-related protein 2 3 complex subunit 2-like                                  |
| contig_2934  | 2.1 | 0.043022 | Transmembrane protein 87b                                                         |
| Ta_S16058462 | 2.1 | 0.015165 | Tryptophansynthase subunit beta                                                   |
| Ta_S13000024 | 2.1 | 0.049558 | Homeobox protein hox-c4                                                           |
| contig_1033  | 2.1 | 0.009665 | Not found                                                                         |
| Ta_S18008953 | 2.1 | 0.040356 | Not found                                                                         |
| Ta_S52542397 | 2.1 | 0.037953 | Rhodanese homology domain-containing protein                                      |
| Ta_S12977017 | 2.1 | 0.034287 | Sialyltransferase-like protein                                                    |
| Ta_S26028954 | 2.1 | 0.019628 | Cysteine-rich receptor-like protein kinase 10-like                                |
| Ta_S32566041 | 2.1 | 0.035432 | Not found                                                                         |
| contig_4518  | 2.1 | 0.0373   | Tbcc domain-containing protein 1-like isoform 2                                   |
| contig_2912  | 2.1 | 0.047699 | Not found                                                                         |
| Ta_S58885203 | 2.0 | 0.013504 | Auxin-induced protein pcnt115-like isoform 1                                      |
| Ta_S52542430 | 2.0 | 0.001997 | Nitrile-specifier protein 5-like                                                  |



|              |     |          |                                                             |
|--------------|-----|----------|-------------------------------------------------------------|
| contig_2364  | 2.0 | 0.035622 | Not found                                                   |
| Ta_S52541388 | 2.0 | 0.017841 | Not found                                                   |
| contig_5468  | 2.0 | 0.034603 | Not found                                                   |
| contig_5536  | 2.0 | 0.023919 | Not found                                                   |
| Ta_S13109609 | 2.0 | 0.009045 | Glutathione s-transferase 4-like                            |
| Ta_S58849569 | 2.0 | 0.041587 | Eukaryotic aspartyl protease family expressed               |
| Ta_S58867749 | 2.0 | 0.043975 | Glutamyl-trna synthetase                                    |
| contig_4742  | 2.0 | 0.049874 | Not found                                                   |
| Ta_S13146959 | 2.0 | 0.045941 | Hypothetical protein [Zea mays]                             |
| Ta_S58865230 | 2.0 | 0.030608 | Protein binding                                             |
| Ta_S52542697 | 2.0 | 0.033319 | Hypothetical protein SORBIDRAFT_09g022220 [Sorghum bicolor] |
| Ta_S13057957 | 2.0 | 0.02364  | Hydroquinone glucosyltransferase                            |
| Ta_S58900435 | 2.0 | 0.040822 | Cobw domain-containing protein 2-like isoform 2             |
| Ta_S58857859 | 2.0 | 0.035993 | Tsn1                                                        |
| Ta_S58896684 | 2.0 | 0.004458 | Thiamine biosynthetic enzyme                                |
| contig_2355  | 2.0 | 0.040908 | Not found                                                   |
| Ta_S52544123 | 2.0 | 0.038415 | Short chain alcohol                                         |
| Ta_S17889067 | 2.0 | 0.01788  | Phosphoenolpyruvate carboxykinase                           |

---

<sup>a</sup> Fold-change in red indicates down-regulation in colonized wheat roots (CWR); (+)ND not expressed in the N-IWR libraries; (-) ND not expressed in the CWR libraries.
