# Supplementary material for: Dual RNA-seq transcriptional analysis of wheat roots colonized by Azospirillum brasilense reveals up-regulation of nutrient acquisition and cell cycle genes
Source: PubMed Central journal article supplement (PMC4042000; doi:10.1186/1471-2164-15-378), 2014-05-16
Supplement: 12864_2013_6083_MOESM6_ESM.pdf [file 12864_2013_6083_MOESM6_ESM.pdf]

**Table S5A** Overrepresented GO categories of up-regulated *Triticum aestivum*-ESTs in colonized roots

| <b>Sequence ID</b>                                            | <b>Fold-<br/>Change</b> | <b>p-value</b> | <b>Sequence Description</b>                                 |
|---------------------------------------------------------------|-------------------------|----------------|-------------------------------------------------------------|
| <b><i>Transport Activity ( Molecular Function)</i></b>        |                         |                |                                                             |
| Ta_S58899343                                                  | 3.1                     | 0.0037         | Metal transporter nramp6-like                               |
| Ta_S58895262                                                  | 2.4                     | 0.0412         | Predicted protein [hordeum vulgare subsp. Vulgare]          |
| Ta_S58894107                                                  | 3.2                     | 0.0245         | Amino acid permease                                         |
| Ta_S58842370                                                  | 4.0                     | 0.0155         | GDP-mannose transporter                                     |
| Ta_S32626973                                                  | 2.6                     | 0.0292         | Peptide transporter ptr2-like                               |
| Ta_S32501583                                                  | 3.4                     | 0.0168         | Conserved hypothetical protein                              |
| Ta_S17976596                                                  | 3.1                     | 0.0089         | Sulphate transporter                                        |
| Ta_S17897607                                                  | 2.9                     | 0.0182         | Major facilitator protein                                   |
| Ta_S13177057                                                  | 4.2                     | 0.0091         | Nitrate efflux transporter                                  |
| Ta_S13172731                                                  | 3.2                     | 0.0469         | Cytochrome c oxidase polypeptide vib                        |
| Ta_S12971663                                                  | 2.0                     | 0.0367         | Carrier protein                                             |
| contig_6340                                                   | 2.1                     | 0.0166         | Predicted protein [hordeum vulgare subsp. Vulgare]          |
| contig_6114                                                   | 3.4                     | 0.0315         | Mac perforin domain containing protein                      |
| contig_6109                                                   | 2.2                     | 0.0394         | Probable importin subunit beta-4-like                       |
| contig_5883                                                   | 3.6                     | 0.0073         | Amino acid permease family expressed                        |
| contig_5105                                                   | 5.0                     | 0.0024         | Calcium-transporting ATPase plasma membrane-type-like       |
| contig_4225                                                   | 2.1                     | 0.0360         | Calcium-transporting ATPase endoplasmic reticulum-type-like |
| contig_2635                                                   | 2.4                     | 0.0202         | ABC transporter c family member 9-like                      |
| contig_2239                                                   | 4.5                     | 0.0009         | ABC transporter b family member 20-like                     |
| <b><i>Enzyme Regulator Activity ( Molecular Function)</i></b> |                         |                |                                                             |
| Ta_S58886404                                                  | 2.2                     | 0.0356         | Conserved hypothetical protein                              |
| Ta_S37759224                                                  | 3.9                     | 0.0063         | Nb-arc domain containing expressed                          |
| contig_2743                                                   | 2.4                     | 0.0372         | Disease resistance protein rga4-like                        |
| contig_1160                                                   | 3.1                     | 0.0131         | Disease resistance protein rpm1-like                        |

---

**Death – (Biological Process)**

---

|              |     |        |                                      |
|--------------|-----|--------|--------------------------------------|
| Ta_S32501583 | 3.4 | 0.0168 | Conserved hypothetical protein       |
| contig_5199  | 3.6 | 0.0023 | Disease resistance protein rpm1-like |
| contig_4292  | 2.9 | 0.0063 | Nb-arc domain containing expressed   |
| contig_395   | 2.0 | 0.0430 | Disease resistance protein rga4-like |
| contig_2394  | 2.9 | 0.0243 | NBS-LRR                              |

---

**Biological Regulation – (Biological Process)**

---

|              |      |        |                                                                         |
|--------------|------|--------|-------------------------------------------------------------------------|
| Ta_S59490000 | 6.9  | 0.0465 | Myb transcription factor                                                |
| Ta_S58899343 | 3.1  | 0.0037 | Metal transporter nramp6-like                                           |
| Ta_S58891564 | 7.9  | 0.0001 | Cytochrome p450 liketbp                                                 |
| Ta_S58886404 | 2.2  | 0.0356 | Tbc domain containing protein                                           |
| Ta_S58884158 | 14.0 | 0.0000 | Cytochrome p450 liketbp                                                 |
| Ta_S58855127 | 2.2  | 0.0240 | Protein far1-related sequence 12-like                                   |
| Ta_S37811862 | 2.4  | 0.0215 | DNA binding protein                                                     |
| Ta_S17889461 | 2.5  | 0.0275 | Sphingoid long-chain bases kinase 1                                     |
| Ta_S16267847 | 2.4  | 0.0402 | Hsf-type dna-binding domain containing expressed                        |
| Ta_S16212763 | 2.5  | 0.0195 | Galactose-1-phosphate uridylyltransferase                               |
| Ta_S13165985 | 4.3  | 0.0275 | Auxin-induced protein 15a                                               |
| Ta_S13124877 | 2.7  | 0.0019 | Initiation factor                                                       |
| contig_791   | 2.2  | 0.0047 | Regulator of nonsense transcripts 1 homolog                             |
| contig_5777  | 2.2  | 0.0345 | Beach domain-containing protein lvsalike                                |
| contig_5714  | 2.6  | 0.0393 | Actin depolymerizing factor 4                                           |
| contig_4052  | 2.1  | 0.0454 | Arp2 3 complex 34 kda subunit                                           |
| contig_4027  | 13.8 | 0.0122 | Hsf-type dna-binding domain containing expressed                        |
| contig_3699  | 2.8  | 0.0253 | Histidine kinase- dna gyrase b- and hsp90-like<br>atpase family protein |
| contig_3502  | 2.4  | 0.0308 | Vacuolar protein sorting 13c                                            |
| contig_31    | 2.6  | 0.0362 | Vacuolar protein sorting 13c                                            |
| contig_2914  | 2.2  | 0.0354 | Protease do-like 7-like                                                 |
| contig_2743  | 2.4  | 0.0372 | Tbc domain containing protein                                           |

|             |     |        |                                                                  |
|-------------|-----|--------|------------------------------------------------------------------|
| contig_2730 | 2.3 | 0.0269 | Chd3-type chromatin-remodeling factor pickle-like                |
| contig_2382 | 2.4 | 0.0459 | Transcription factor bhlh128                                     |
| contig_1160 | 3.1 | 0.0131 | Brefeldin a-inhibited guanine nucleotide-exchange protein 1-like |

---

***Extracellular Region – (Cellular Component)***

---

|              |     |        |                                                                   |
|--------------|-----|--------|-------------------------------------------------------------------|
| Ta_S37759224 | 3.9 | 0.0063 | Bowman-birk trypsin inhibitor-like protein                        |
| Ta_S20999571 | 2.3 | 0.0303 | Probable xyloglucan endotransglucosylase hydrolase protein 8-like |
| Ta_S17893420 | 2.4 | 0.0084 | Beta-expansin 1a expressed                                        |
| Ta_S12902351 | 5.7 | 0.0409 | Endo-beta-glucanase                                               |
| contig_3741  | 3.7 | 0.0003 | Beta-expansin 2 precursor                                         |

---

***Macromolecular Complex – (Cellular Component)***

---

|              |      |        |                                                           |
|--------------|------|--------|-----------------------------------------------------------|
| Ta_S58894413 | 2.7  | 0.0358 | 6-phosphofructokinase 4                                   |
| Ta_S58861971 | -    | 0.0308 | Uncharacterized protein [Brachypodium distachyon]         |
| Ta_S58854607 | 59.8 | 0.0012 | Replication factor c subunit                              |
| Ta_S43485972 | 2.9  | 0.0101 | Protein phosphatase 2c                                    |
| Ta_S32659341 | 2.8  | 0.0304 | Ribosomal protein s12                                     |
| Ta_S17880905 | 2.3  | 0.0483 | 50s ribosomal protein l33                                 |
| Ta_S13172731 | 3.2  | 0.0469 | Cytochrome c oxidase polypeptide vib                      |
| Ta_S13148233 | 2.3  | 0.0155 | 60s ribosomal protein l34                                 |
| Ta_S13146836 | 3.3  | 0.0158 | 60s ribosomal protein l7-1                                |
| Ta_S13144009 | 3.6  | 0.0458 | 60s ribosomal protein l34                                 |
| contig_6109  | 2.2  | 0.0394 | Probable importin subunit beta-4-like                     |
| contig_5480  | 4.3  | 0.0015 | DNA repair protein rad50                                  |
| contig_3896  | 4.9  | 0.0231 | Atp synthase f0 subunit 6                                 |
| contig_3292  | 4.7  | 0.0016 | Ribonucleotide reductase                                  |
| contig_2968  | 2.2  | 0.0362 | Eukaryotic translation initiation factor 3 subunit c-like |
| contig_2943  | 2.7  | 0.0173 | NADH-ubiquinone oxidoreductase subunit                    |
| contig_2923  | 2.4  | 0.0329 | Callose synthase                                          |
| contig_1395  | 2.0  | 0.0331 | Kinesin heavy chain                                       |

|             |     |        |                                  |
|-------------|-----|--------|----------------------------------|
| contig_1285 | 3.3 | 0.0489 | Microtubule organization protein |
|-------------|-----|--------|----------------------------------|

**Table S5B** Overrepresented GO categories of down-regulated *Triticum aestivum*-ESTs

| Sequence ID                                                                                 | Fold-<br>Change <sup>a</sup> | p-value | Sequence Description                                      |
|---------------------------------------------------------------------------------------------|------------------------------|---------|-----------------------------------------------------------|
| <b><i>Nucleic Acid Biding Transcriptional Regulator Activity – (Molecular Function)</i></b> |                              |         |                                                           |
| Ta_S58889807                                                                                | 6.2                          | 0.0394  | Global transcription factor group                         |
| Ta_S58855596                                                                                | 2.3                          | 0.0257  | Protein nlrc3-like                                        |
| Ta_S52543551                                                                                | 2.7                          | 0.0103  | Basic region leucine zipper protein                       |
| Ta_S35718003                                                                                | 3.3                          | 0.0344  | Cbf protein 4                                             |
| Ta_S26023930                                                                                | 2.1                          | 0.0278  | High mobility group b protein 7-like                      |
| Ta_S26022932                                                                                | 2.6                          | 0.0356  | Grassy tillers 1                                          |
| Ta_S13000024                                                                                | 2.1                          | 0.0496  | Homeobox protein hox-c4                                   |
| Ta_S12923244                                                                                | 2.4                          | 0.0099  | Ribulose-bisphosphate carboxylase activase                |
| contig_179                                                                                  | 2.7                          | 0.0271  | Choline ethanolamine kinase                               |
| <b><i>Biological Regulation – (Biological Process)</i></b>                                  |                              |         |                                                           |
| Ta_S59490003                                                                                | 4.9                          | 0.0402  | R2R3-Myb transcription factor                             |
| Ta_S58889807                                                                                | 6.2                          | 0.0394  | Global transcription factor group                         |
| Ta_S58888286                                                                                | 6.4                          | 0.0027  | Protein chloroplast import apparatus 2-like               |
| Ta_S58886850                                                                                | 2.4                          | 0.0151  | Apurinic endonuclease-redox protein                       |
| Ta_S58869803                                                                                | 4.5                          | 0.0224  | Something about silencing protein                         |
| Ta_S58863091                                                                                | 1.4                          | 0.0223  | Negative regulation of translation N-glycosylase activity |
| Ta_S58855596                                                                                | 2.3                          | 0.0257  | Protein nlrc3-like                                        |
| Ta_S52545220                                                                                | 2.7                          | 0.0241  | Chloroplast omega-6 fatty acid desaturase                 |
| Ta_S52544123                                                                                | 2.0                          | 0.0384  | Short chain alcohol                                       |
| Ta_S52543551                                                                                | 2.7                          | 0.0103  | Basic region leucine zipper protein                       |
| Ta_S35718003                                                                                | 3.3                          | 0.0344  | Cbf protein 4                                             |
| Ta_S26022932                                                                                | 2.6                          | 0.0356  | Grassy tillers 1                                          |
| Ta_S17057489                                                                                | 3.6                          | 0.0121  | Auxin response factor 3-like                              |

|              |     |        |                                                   |
|--------------|-----|--------|---------------------------------------------------|
| Ta_S13232890 | 2.3 | 0.0160 | Adp-ribosylation factor                           |
| Ta_S13051479 | 3.4 | 0.0261 | Serine threonine-protein kinase afc1              |
| Ta_S13014352 | 7.8 | 0.0170 | Protein suppressor of gene silencing-like protein |
| Ta_S13011770 | 3.9 | 0.0160 | Response regulator receiver domain                |
| Ta_S13000024 | 2.1 | 0.0496 | Homeobox protein hox-c4                           |
| contig_6115  | 5.5 | 0.0118 | Cytochrome c biogenesis protein precursor         |
| contig_3567  | 3.1 | 0.0466 | Histidine kinase 1                                |
| contig_2559  | 2.1 | 0.0428 | At1g03060-like partial                            |
| contig_179   | 2.7 | 0.0271 | Choline ethanolamine kinase                       |
| contig_1554  | 2.1 | 0.0463 | Actin-related protein 2 3 complex subunit 2-like  |

---

***Extracellular Region – (Cellular Component)***

|              |     |        |                                               |
|--------------|-----|--------|-----------------------------------------------|
| Ta_S53281796 | 4.6 | 0.0045 | Alpha expansin [Triticum aestivum]            |
| Ta_S52546553 | 2.2 | 0.0018 | Subtilisin-like protease                      |
| Ta_S52543823 | 4.4 | 0.0147 | Glycolate oxidase                             |
| Ta_S26027242 | 2.7 | 0.0261 | Chaperonin 20                                 |
| Ta_S13567817 | 2.5 | 0.0286 | Rubisco subunit binding-protein alpha subunit |
| contig_189   | 3.6 | 0.0028 | Hydroxypyruvate reductase                     |

---

***Macromolecular Complex – (Cellular Component)***

|              |     |        |                                                              |
|--------------|-----|--------|--------------------------------------------------------------|
| Ta_S58904389 | 2.6 | 0.0179 | Clp-like energy-dependent protease                           |
| Ta_S58900106 | 3.8 | 0.0361 | Light-harvesting complex I chlorophyll a b binding protein 3 |
| Ta_S58889807 | 6.2 | 0.0394 | Global transcription factor group                            |
| Ta_S52541238 | 3.0 | 0.0367 | Unknown protein (partial protein)                            |
| Ta_S26026252 | 2.8 | 0.0275 | 50s ribosomal protein I9                                     |
| Ta_S26025255 | 5.4 | 0.0120 | Photosystem II reaction center w protein                     |
| Ta_S26022483 | 3.8 | 0.0047 | Mrna turnover protein 4 homolog                              |
| Ta_S17987196 | 2.7 | 0.0337 | Alpha 3 subunit of 20s proteasome                            |
| Ta_S17889976 | 2.3 | 0.0369 | Chlorophyll a b binding protein                              |
| Ta_S17888161 | 2.1 | 0.0314 | Chlorophyll a-b binding protein of LHCII type III            |
| Ta_S16203131 | 2.2 | 0.0461 | Ribosomal protein I29 family protein                         |
| Ta_S13567817 | 2.5 | 0.0286 | Rubisco subunit binding-protein alpha subunit                |

|              |     |        |                                                                   |
|--------------|-----|--------|-------------------------------------------------------------------|
| Ta_S12894932 | 5.9 | 0.0034 | Vip3 protein (predicted protein [Hordeum vulgare subsp. Vulgare]) |
| contig_6247  | 3.1 | 0.0317 | Ubiquitin-protein pub49                                           |
| contig_5972  | 3.4 | 0.0369 | Kinesin-like protein                                              |
| contig_1554  | 2.1 | 0.0463 | Actin-related protein 2 3 complex subunit 2-like                  |

---

<sup>a</sup> Fold-change in red indicates down-regulation in colonized wheat roots (CWR).
