# Supplementary material for: Dual RNA-seq transcriptional analysis of wheat roots colonized by Azospirillum brasilense reveals up-regulation of nutrient acquisition and cell cycle genes
Source: PubMed Central journal article supplement (PMC4042000; doi:10.1186/1471-2164-15-378), 2014-05-16
Supplement: 12864_2013_6083_MOESM7_ESM.pdf [file 12864_2013_6083_MOESM7_ESM.pdf]

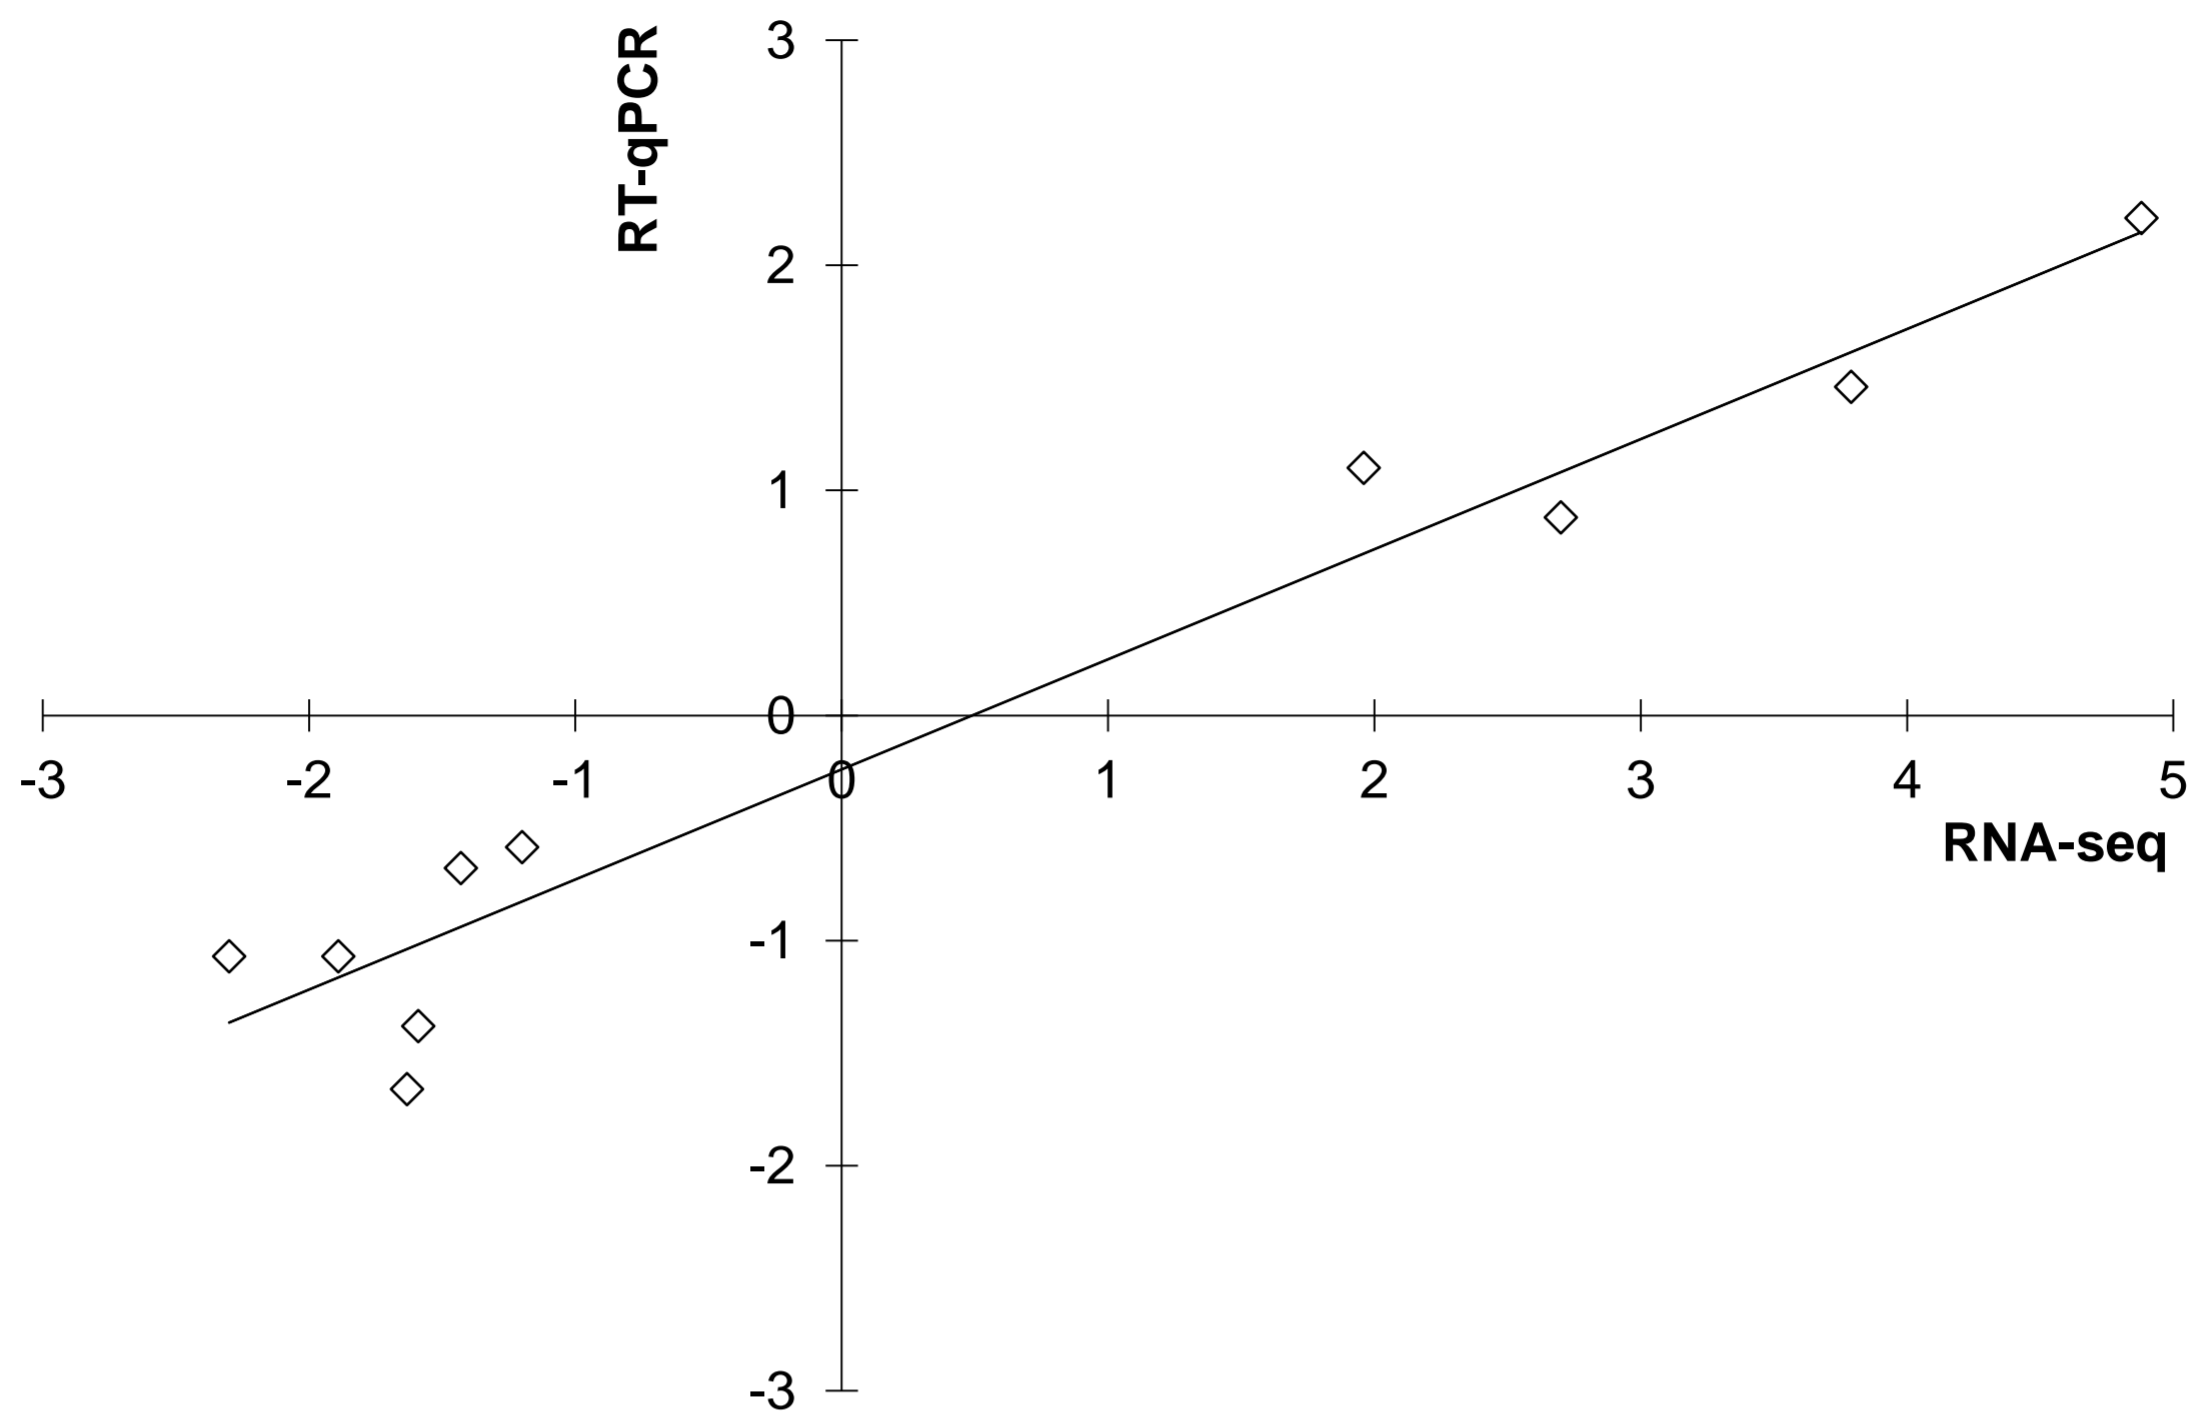

**Figure S2** Scatter plot: RNA-seq vs. RT-qPCR

RNA-seq and RT-qPCR relative level of expression are presented as log<sub>2</sub>fold-change

*Triticum aestivum* genes presented in the scatter plot: TaS\_37759224\*\*, TaS\_52545880\*\*,

contig\_4027\*\*\*, TaS\_52541981\*, TaS\_22370925\*, TaS\_37846208\*, TaS\_17890143\*,

TaS\_26026646\*, TaS552541449\*\* and contig\_2766\*\*. RNA-seq data represent biological duplicates

of colonized and non-inoculated wheat roots. RT-qPCR data represent biological duplicates of

colonized and non-inoculated wheat roots, obtained independently from RNA-seq samples, and

each sample was run in triplicate. Significant differences in the RT-qPCR (\*p < 0.05, \*\* p < 0.01, and

\*\*\* p < 0.001) were determined using one-tailed t-test. Pearson coefficient correlation between

RNA-seq and qRT-PCR was >0.97, p-value<0.0001.
