# Supplementary material for: Dual RNA-seq transcriptional analysis of wheat roots colonized by Azospirillum brasilense reveals up-regulation of nutrient acquisition and cell cycle genes
Source: PubMed Central journal article supplement (PMC4042000; doi:10.1186/1471-2164-15-378), 2014-05-16
Supplement: 12864_2013_6083_MOESM8_ESM.pdf [file 12864_2013_6083_MOESM8_ESM.pdf]

**Table S6** *Triticum aestivum* MADs-Box expressed-ESTs

| Sequence ID  | Fold-<br>Change | <i>p</i> -value | Sequence Description                                 |
|--------------|-----------------|-----------------|------------------------------------------------------|
| Ta_S32520254 | 2.7             | 0.1381          | MADs-box transcription factor (TaAGL33-like)         |
| Ta_S13147416 | 1.4             | 0.4905          | MADs box-like protein                                |
| Ta_S41658047 | 1.3             | 0.8285          | MIKC-type mads-box transcription factor (WM30B-like) |
| Ta_S26028956 | 1.2             | 0.7430          | MIKC-type mads-box transcription factor (WM12B-like) |
| Ta_S33259699 | 1.2             | 0.4477          | MIKC-type mads-box transcription factor (WM14B-like) |
| Ta_S26028946 | 1.1             | 0.7267          | MADs-box transcription factor (TaAGL33-like)         |
| contig_3667  | 1.0             | 0.5672          | MADs box interactor-like                             |
| Ta_S58889628 | 1.0             | 0.7981          | MADs box interactor-like                             |
| Ta_S52542334 | 1.1             | 0.8974          | MADs box-like protein                                |
| Ta_S39875454 | 1.2             | 0.7417          | MADs-box transcription factor (TaAGL4-like)          |
| Ta_S32896805 | 1.3             | 0.7167          | MADs-box transcription factor (TaAGL32-like)         |
| Ta_S33259701 | 1.4             | 0.6196          | MADs-box transcription factor (TaAGL33-like)         |
| Ta_S37823145 | 1.4             | 0.3463          | MADs-box transcription factor 26                     |
| Ta_S41658057 | 1.4             | 0.1931          | MIKC-type mads-box transcription factor (WM22B-like) |
| Ta_S41658042 | 1.6             | 0.1974          | MIKC-type mads-box transcription factor (WM32B-like) |
| Ta_S41658082 | 1.7             | 0.2603          | MIKC-type mads-box transcription factor (WM3B-like)  |
| Ta_S26028737 | 1.7             | 0.5153          | MADs box-like protein                                |

<sup>a</sup> Fold-change in red indicates lower level of expression in colonized wheat roots (CWR).
