# Supplementary material for: Dual RNA-seq transcriptional analysis of wheat roots colonized by Azospirillum brasilense reveals up-regulation of nutrient acquisition and cell cycle genes
Source: PubMed Central journal article supplement (PMC4042000; doi:10.1186/1471-2164-15-378), 2014-05-16
Supplement: 12864_2013_6083_MOESM9_ESM.pdf [file 12864_2013_6083_MOESM9_ESM.pdf]

**Table S7** Expressed ORFs of *Azospirillum brasilense* strain FP2 colonizing *Triticum aestivum* seedling roots

| ORF                                                                                                   | Gene name        | CWR coverage | Protein descriptions                               |
|-------------------------------------------------------------------------------------------------------|------------------|--------------|----------------------------------------------------|
| <b><i>Genes of Azospirillum brasilense involved in nitrogen fixation</i></b>                          |                  |              |                                                    |
| 0003.0824                                                                                             | <i>amtB</i>      | 2.2          | Ammonium transporter                               |
| 0001.1395                                                                                             | <i>glnA</i>      | 9.6          | Glutamine synthetase                               |
| 0001.0450                                                                                             | <i>glnB</i>      | 7.8          | Nitrogen regulatory protein pII                    |
| 0001.1150                                                                                             | <i>nifH</i>      | 1.5          | Nitrogenase reductase                              |
| 0001.1149                                                                                             | <i>nifD</i>      | 1.4          | Nitrogenase molybdenum-iron protein alpha chain    |
| 0001.1148                                                                                             | <i>nifK</i>      | 1.6          | Nitrogenase molybdenum-iron protein beta chain     |
| <b><i>Genes of Azospirillum brasilense involved in adaptation processes</i></b>                       |                  |              |                                                    |
| 0007.0064                                                                                             |                  | 6.7          | Hypothetical calcium-binding protein               |
| 0004.0099                                                                                             |                  | 1.8          | Hypothetical hemolysin-type calcium-binding region |
| 0003.0744                                                                                             |                  | 1.6          | Putative hemolysin-type calcium-binding region     |
| 0001.2030                                                                                             | <i>narL-like</i> | 30.2         | Two-component response regulator                   |
| 0005.0680                                                                                             | <i>narL-like</i> | 6.9          | Two-component response regulator                   |
| 0001.2448                                                                                             | <i>narL-like</i> | 3.7          | Two-component response regulator                   |
| 0002.0515                                                                                             |                  | 39.5         | Putative transcriptional regulator, Crp/Fnr family |
| 0001.1830                                                                                             |                  | 1.8          | Crp/Fnr family transcriptional regulator           |
| 0001.1948                                                                                             |                  | 1.1          | Crp/Fnr family transcriptional regulator           |
| 0002.0162                                                                                             |                  | 12.8         | Superoxide dismutase                               |
| 0003.0751                                                                                             | <i>phaC</i>      | 5.7          | Poly(3-hydroxyalkanoate) synthetase                |
| 0004.0441                                                                                             | <i>phbC</i>      | 1.5          | Poly-beta-hydroxybutyrate polymerase               |
| 0005.0595                                                                                             | <i>phbC</i>      | 1.3          | Poly-beta-hydroxybutyrate polymerase               |
| 0001.1620                                                                                             |                  | 12.8         | Phasin protein                                     |
| 0001.1052                                                                                             |                  | 9.6          | Phasin protein                                     |
| 0001.1053                                                                                             |                  | 1.0          | Phasin protein                                     |
| 0002.0156                                                                                             |                  | 1.0          | Phasin protein                                     |
| <b><i>Genes of Azospirillum brasilense involved in chemotaxis, adhesion and biofilm formation</i></b> |                  |              |                                                    |
| 0002.1124                                                                                             | <i>xseB</i>      | 3.8          | Exodeoxyribonuclease VII small subunit             |

|           |                  |      |                                                                                                                                     |
|-----------|------------------|------|-------------------------------------------------------------------------------------------------------------------------------------|
| 0003.0134 | <i>exoP</i>      | 9.1  | Succinoglycan biosynthesis transport protein                                                                                        |
| 0002.0842 | <i>expY</i>      | 6.1  | Undecaprenyl-phosphate galactose<br>phosphotransferase activator                                                                    |
| 0007.0020 | <i>exoB</i>      | 1.0  | UDP-glucose 4-epimerase                                                                                                             |
| 0003.0288 |                  | 5.7  | UDP-glucose 4-epimerase                                                                                                             |
| 0002.0519 | <i>galE</i>      | 1.3  | UDP-glucose 4-epimerase                                                                                                             |
| 0001.1918 | <i>glmS</i>      | 2.1  | Glucosamine-fructose-6-phosphate<br>aminotransferase                                                                                |
| 0005.0494 |                  | 2.6  | Glucose-methanol-choline oxidoreductase                                                                                             |
| 0003.0290 |                  | 4.8  | Putative glycosyl transferase                                                                                                       |
| 0001.1795 |                  | 1.1  | Putative glycosyl transferase                                                                                                       |
| 0002.0840 |                  | 1.6  | Putative glycosyl transferase                                                                                                       |
| 0002.0849 |                  | 4.6  | Putative glycosyl transferase                                                                                                       |
| 0001.1208 |                  | 1.6  | Putative glycosyl transferase                                                                                                       |
| 0003.0140 |                  | 6.2  | Glycosyl transferase                                                                                                                |
| 0002.0838 |                  | 2.9  | Putative glycosyl transferase                                                                                                       |
| 0002.0839 |                  | 1.6  | Putative glycosyl transferase                                                                                                       |
| 0001.1950 |                  | 2.2  | Putative glycosyl transferase                                                                                                       |
| 0001.2661 |                  | 2.1  | Putative glycosyl transferase                                                                                                       |
| 0007.0094 |                  | 2.7  | Putative glycosyl transferase                                                                                                       |
| 0002.1398 | <i>cheY-like</i> | 29.4 | Two-component response regulator                                                                                                    |
| 0005.0410 | <i>sbpA</i>      | 67.8 | Sugar binding protein                                                                                                               |
| 0005.0410 | <i>gbpR</i>      | 67.8 | HTH-type transcriptional regulator                                                                                                  |
| 0005.0411 | <i>gguA</i>      | 16.5 | Monosaccharide ABC transporter                                                                                                      |
| 0005.0412 | <i>gguB</i>      | 18.5 | Monosaccharide ABC transporter                                                                                                      |
| 0005.0408 | <i>ytfQ-like</i> | 31.0 | Sugar ABC transporter                                                                                                               |
| 0005.0377 | <i>galU</i>      | 3.6  | UDP-glucose-1-phosphate uridylyltransferase<br>(biosynthesis and degradation of surface<br>polysaccharides and lipopolysaccharides) |

|           |                  |      |                                                                         |
|-----------|------------------|------|-------------------------------------------------------------------------|
| 0003.0953 |                  | 5.9  | Putative sugar ABC transporter; substrate-binding periplasmic component |
| 0001.2285 |                  | 6.2  | Putative polysaccharide export protein                                  |
| 0003.0301 |                  | 1.9  | Putative lipopolysaccharide biosynthesis protein                        |
| 0003.0287 |                  | 8.0  | UDP-glucose 6-dehydrogenase                                             |
| 0003.0135 |                  | 14.7 | UDP-glucose GDP-mannose dehydrogenase                                   |
| 0001.1919 | <i>glmU</i>      | 2.6  | UDP-n-acetylglucosamine pyrophosphorylase                               |
| 0005.0407 | <i>rbsA-like</i> | 4.8  | Sugar ABC transporter, ATP-binding component                            |
| 0005.0405 | <i>rbsC-like</i> | 3.8  | Sugar ABC transporter, permease component                               |
| 0005.0406 | <i>rbsC-like</i> | 3.1  | Sugar ABC transporter, permease component                               |
| 0003.0292 |                  | 5.8  | Putative bacterial sugar transferase family protein                     |

---
