# Supplementary material for: Dual RNA-seq transcriptional analysis of wheat roots colonized by Azospirillum brasilense reveals up-regulation of nutrient acquisition and cell cycle genes
Source: PubMed Central journal article supplement (PMC4042000; doi:10.1186/1471-2164-15-378), 2014-05-16
Supplement: 12864_2013_6083_MOESM10_ESM.pdf [file 12864_2013_6083_MOESM10_ESM.pdf]

**Table S8** Host response found during plant-microbe interaction: Defense mechanism, hormone imbalances and secretion of phytochemicals

| Sequence ID                     | Fold Change <sup>a</sup> | <i>p</i> -value | Sequence description                                               |
|---------------------------------|--------------------------|-----------------|--------------------------------------------------------------------|
| <b><i>Defense mechanism</i></b> |                          |                 |                                                                    |
| Ta_S58840665                    | (+) ND                   | 0.0449          | Hypothetical protein                                               |
| Ta_S58884106                    | 14.9                     | 0.0004          | Disease resistance protein (rpm1-like)                             |
| Ta_S12902351                    | 5.7                      | 0.0409          | Endo-beta-glucanase                                                |
| Ta_S37759224                    | 3.9                      | 0.0063          | Bowman-birk trypsin inhibitor-like protein                         |
| contig_2770                     | 3.7                      | 0.0001          | Beta-amyrin synthase                                               |
| contig_5199                     | 3.6                      | 0.0023          | Disease resistance protein (rpm1-like)                             |
| Ta_S58861829                    | 3.4                      | 0.0117          | Beta-glucosidase 5-like isoform 2                                  |
| Ta_S58851000                    | 2.9                      | 0.0171          | LRR receptor serine threonine-protein kinase at3g47570-like        |
| contig_4292                     | 2.9                      | 0.0063          | NB-arc domain containing expressed                                 |
| contig_2394                     | 2.9                      | 0.0243          | NBS-LRR partial                                                    |
| contig_1142                     | 2.6                      | 0.0477          | Blight resistance protein                                          |
| Ta_S58861380                    | 2.5                      | 0.0453          | Serine threonine-protein kinase (rks1-like)                        |
| Ta_S22378208                    | 2.5                      | 0.0314          | Beta-amyrin synthase                                               |
| Ta_S26028472                    | 2.3                      | 0.0435          | NBS-LRR disease resistance protein homologue                       |
| contig_395                      | 2.0                      | 0.0430          | Disease resistance protein rga4-like                               |
| Ta_S32501583                    | 3.4                      | 0.0168          | Hypothetical protein                                               |
| Ta_S58857859                    | 2.0                      | 0.0360          | <i>tsn1</i>                                                        |
| Ta_S52546553                    | 2.2                      | 0.0018          | Subtilisin-like protease                                           |
| contig_6090                     | 2.3                      | 0.0412          | Abscisic acid receptor (pyl8-like)                                 |
| Ta_S58853104                    | 2.6                      | 0.0442          | LRR receptor-like serine threonine-protein kinase (at3g47570-like) |
| contig_4596                     | 2.7                      | 0.0276          | Protein kinase (pp2c-like)                                         |
| contig_2829                     | 3.3                      | 0.0165          | Disease resistance protein rpp13-like                              |
| contig_667                      | 3.4                      | 0.0073          | Beta-glucosidase 3 precursor                                       |
| Ta_S37773901                    | 3.9                      | 0.0210          | Cytochrome p450                                                    |

|              |       |        |                                                  |
|--------------|-------|--------|--------------------------------------------------|
| Ta_S32602541 | 4.3   | 0.0356 | WRKY45-like transcription factor                 |
| contig_387   | 4.5   | 0.0151 | Peroxidase 1 precursor                           |
| Ta_S16246857 | 7.3   | 0.0062 | Disease resistance protein rpm1-like             |
| Ta_S58912535 | (-)ND | 0.0333 | WAK1 - receptor-like cytoplasmic kinase ( -rlck) |

---

***Defense mechanism: Heat shock proteins***

---

|              |      |        |                                                  |
|--------------|------|--------|--------------------------------------------------|
| Ta_S52544833 | 80.0 | 0.0375 | Small heat shock protein                         |
| Ta_S16236735 | 76.4 | 0.0196 | Heat-shock protein                               |
| Ta_S16229254 | 48.9 | 0.0489 | Heat shock protein                               |
| Ta_S52541981 | 29.4 | 0.0198 | Heat shock                                       |
| Ta_S58858619 | 19.9 | 0.0292 | Low molecular weight heat shock protein          |
| Ta_S22373503 | 14.5 | 0.0353 | HSF-type DNA-binding domain                      |
| contig_4027  | 13.8 | 0.0122 | HSF-type DNA-binding domain                      |
| Ta_S32507710 | 6.2  | 0.0000 | Heat shock cognate 70 kda                        |
| Ta_S16267847 | 2.4  | 0.0402 | HSF-type DNA-binding domain containing expressed |
| contig_3699  | 2.8  | 0.0253 | HSP90-like ATPase family protein                 |

---

***Hormone imbalances***

---

|              |     |        |                                              |
|--------------|-----|--------|----------------------------------------------|
| Ta_S13165985 | 4.3 | 0.0275 | Auxin induced protein SAUR (small auxin RNA) |
| Ta_S17057489 | 3.6 | 0.0121 | ETTIN/ARF3                                   |
| Ta_S58885203 | 2.0 | 0.0135 | Aldo-keto-reductase auxin-induced            |
| Ta_S52541449 | 3.1 | 0.0154 |                                              |

---

***Secretion of phytochemicals***

---

|              |      |        |                                           |
|--------------|------|--------|-------------------------------------------|
| Ta_S58884786 | 5.0  | 0.0349 | Flavonol 3-sulfotransferase               |
| Ta_S37854435 | 11.4 | 0.0006 | AnthoCyanidin -o-glucosyltransferase-like |
| Ta_S37846208 | 2.7  | 0.0157 | AnthoCyanidin -o-glucosyltransferase-like |

---

<sup>a</sup> Fold-change in red indicates down-regulation in colonized wheat roots (CWR); (+)ND not expressed in the N-IWR libraries; (-) ND not expressed in the CWR libraries.
