# Supplementary material for: Dual RNA-seq transcriptional analysis of wheat roots colonized by Azospirillum brasilense reveals up-regulation of nutrient acquisition and cell cycle genes
Source: PubMed Central journal article supplement (PMC4042000; doi:10.1186/1471-2164-15-378), 2014-05-16
Supplement: 12864_2013_6083_MOESM11_ESM.pdf [file 12864_2013_6083_MOESM11_ESM.pdf]

**Table S9** ESTs of *Triticum aestivum* encoding transporters

| Sequence ID                                                            | Fold-change | p-value | Sequence description                         |
|------------------------------------------------------------------------|-------------|---------|----------------------------------------------|
| <b><i>Up-regulated ESTs (fold change&gt;2, p-value&lt; 0.05)</i></b>   |             |         |                                              |
| contig_2239                                                            | 4.5         | 0.0009  | ABC transporter b family member 20-like      |
| Ta_S13177057                                                           | 4.2         | 0.0091  | Nitrate transmembrane transporter next1-like |
| Ta_S58842370                                                           | 4.0         | 0.0155  | GDP-mannose transporter                      |
| contig_5883                                                            | 3.6         | 0.0073  | Amino acid permease family expressed         |
| Ta_S58899343                                                           | 3.1         | 0.0037  | Metal transporter nramp6-like                |
| Ta_S17976596                                                           | 3.1         | 0.0089  | Sulphate transporter                         |
| Ta_S32626973                                                           | 2.6         | 0.0292  | Peptide transporter (ptr2-like)              |
| Ta_S17979451                                                           | 2.6         | 0.0235  | Magnesium transporter nipa2                  |
| contig_2635                                                            | 2.4         | 0.0202  | ABC transporter c family member 9-like       |
| <b><i>Down-regulated ESTs (fold change&gt;2, p-value&lt; 0.05)</i></b> |             |         |                                              |
| contig_6543                                                            | 4.2         | 0.0247  | ABC transporter g family member 16-like      |
| Ta_S58884172                                                           | 3.8         | 0.0190  | Sugar transporter family expressed           |
| Ta_S22381224                                                           | 2.3         | 0.0450  | Potassium transporter 25-like                |
| <b><i>Expressed ESTs</i></b>                                           |             |         |                                              |
| Ta_S58863349                                                           |             |         | ABC transporter                              |
| Ta_S16058169                                                           |             |         | Ammonium transporter amt2                    |
| contig_5490                                                            |             |         | ABC transporter c family member 9-like       |
| contig_3974                                                            |             |         | Peptide transporter                          |
| Ta_S26020880                                                           |             |         | Sugar transporter family expressed           |
| Ta_S13110775                                                           |             |         | Amino acid transporter a1                    |
| Ta_S22371202                                                           |             |         | Cation efflux family protein                 |
| contig_4243                                                            |             |         | ABC transporter d family member              |
| Ta_S17979060                                                           |             |         | Metal transporter nramp5-like                |
| contig_7128                                                            |             |         | Peptide transporter expressed                |
| contig_3978                                                            |             |         | Peptide transporter ptr2-like                |
| Ta_S17985880                                                           |             |         | Peptide transporter ptr2-like                |
| contig_6592                                                            |             |         | ABC transporter b family member 20-like      |
| Ta_S52543465                                                           |             |         | Udp-galactose transporter 3                  |
| contig_6112                                                            |             |         | GDP-mannose transporter gonst3-like          |
| contig_1162                                                            |             |         | Magnesium transporter nipa2-like             |

|              |                                                                |
|--------------|----------------------------------------------------------------|
| Ta_S58867287 | Multidrug resistance protein ABC transporter family            |
| contig_3999  | ABC transporter c family member 10-like isoform 2              |
| Ta_S13022660 | Iron inhibited ABC transporter 2                               |
| Ta_S58840467 | ABC transporter f family member 4-like                         |
| Ta_S32635605 | Carbohydrate transporter sugar porter transporter              |
| contig_809   | Na <sup>+</sup> H <sup>+</sup> antiporter                      |
| contig_2773  | Pdr-type ABC transporter-like                                  |
| Ta_S52543393 | Udp-galactose transporter 6                                    |
| Ta_S17978275 | Amino acid transporter                                         |
| Ta_S58896279 | Mate efflux                                                    |
| contig_3156  | Mate efflux family protein alf5                                |
| Ta_S13050794 | Iron-phytosiderophore transporter protein yellow stripe 1      |
| Ta_S58897641 | Plastidic glucose transporter 4                                |
| contig_3428  | Solute carrier family facilitated glucose transporter member 8 |
| Ta_S58899329 | Pdr-like ABC transporter                                       |
| Ta_S13136892 | Amino acid transporter                                         |
| Ta_S58864202 | Pdr-like ABC transporter                                       |
| Ta_S18943257 | Ammonium transporter amt1.1                                    |
| Ta_S19223739 | Plasma-membrane choline transporter family protein             |
| Ta_S37809725 | Phosphate transporter                                          |
| contig_2754  | Xanthine uracil vitamin c partial                              |
| Ta_S58853003 | Nucleotide sugar transporter-like protein                      |
| contig_5977  | Uncharacterized transporter ybr287w-like                       |
| Ta_S58889324 | Na <sup>+</sup> H <sup>+</sup> antiporter                      |
| Ta_S37946965 | Proton-dependent oligopeptide or low-affinity nitrate partial  |
| Ta_S17981933 | At1est8-like partial                                           |
| contig_4846  | Plastidic glucose transporter 4                                |
| Ta_S52545340 | Bidirectional sugar transporter n3-like                        |
| contig_1260  | At3g28860-like partial                                         |
| Ta_S37854107 | Potassium transporter                                          |
| Ta_S58852201 | Nramp transporter                                              |
| Ta_S58895683 | Nitrate transporter -like                                      |
| contig_4945  | ABC transporter d family member 1-like                         |

|              |                                                                |
|--------------|----------------------------------------------------------------|
| Ta_S13126051 | Pdr-like ABC transporter                                       |
| Ta_S52545695 | Udp-galactose transporter 2-like                               |
| contig_1249  | Solute carrier family facilitated glucose transporter member 8 |
| Ta_S17890420 | Proline transporter 1                                          |
| Ta_S22496174 | Na <sup>+</sup> H <sup>+</sup> antiporter                      |
| contig_3993  | Pdr-like ABC transporter                                       |
| contig_555   | Equilibrative nucleoside transporter                           |
| contig_3830  | ABC transporter c family member 10-like isoform 2              |
| contig_2332  | Multidrug pheromone mdr ABC transporter family                 |
| Ta_S12985419 | Pdr-like ABC transporter                                       |
| Ta_S58842340 | Multidrug resistance protein ABC transporter family            |
| Ta_S13010915 | Hypothetical Protein                                           |
| contig_5119  | Peptide transporter 1                                          |
| contig_5580  | ABC transporter b family member 20-like                        |
| contig_6100  | Gdp-mannose transporter gonst3-like                            |
| Ta_S12922751 | General substrate transporter-like protein                     |
| contig_1208  | ABC transporter d family member                                |
| Ta_S32585634 | Mdr-like ABC transporter                                       |
| contig_1348  | Pdr-like ABC transporter                                       |
| contig_181   | Magnesium transporter nipa2                                    |
| Ta_S58897308 | ABC transporter d family member 1                              |
| Ta_S13021939 | Sulphate transporter                                           |
| Ta_S58861949 | Magnesium transporter nipa2-like                               |
| Ta_S50389128 | Peptide transporter ptr2-like                                  |
| Ta_S58869513 | Multidrug resistance protein ABC transporter family            |
| Ta_S17987431 | Potassium transporter                                          |
| Ta_S52542003 | Peptide transporter ptr2-like                                  |
| Ta_S58869511 | ABC transporter c family member 5-like                         |
| Ta_S58866161 | K <sup>+</sup> efflux antiporter 6-like                        |
| Ta_S52541510 | Metal tolerance protein                                        |
| Ta_S16057927 | ABC transporter b family member 4-like                         |
| contig_6441  | Pdr-like ABC transporter                                       |
| Ta_S17988485 | Aluminum activated citrate transporter                         |

|              |                                                        |
|--------------|--------------------------------------------------------|
| Ta_S16057986 | Mate efflux family protein 7-like                      |
| Ta_S13256283 | Amino acid transporter                                 |
| contig_1452  | Aluminum-activated citrate transporter                 |
| Ta_S16058470 | Zinc transporter                                       |
| contig_2876  | D-xylose-proton symporter-like 2                       |
| Ta_S58888183 | Yellow stripe-like transporter 12                      |
| Ta_S37802999 | Mate efflux family expressed                           |
| contig_4261  | ABC transporter family expressed                       |
| Ta_S58860395 | Cation-chloride cotransporter 1-like                   |
| Ta_S17989018 | ABC transporter family protein                         |
| Ta_S58861424 | Vacuolar amino acid transporter 1-like                 |
| contig_4409  | Pdr-type ABC transporter 9                             |
| Ta_S13058142 | ABC transporter c family member 10-like isoform 2      |
| Ta_S12971892 | Gdp-mannose transporter gonst3-like                    |
| Ta_S58858831 | ABC transporter a family member 7-like                 |
| Ta_S52543473 | Oligopeptide transporter 7-like                        |
| Ta_S58889388 | ABC transporter family expressed                       |
| Ta_S26027328 | Peptide transporter ptr2-like                          |
| Ta_S19225168 | Cation-chloride cotransporter                          |
| Ta_S58843363 | Potassium transporter 11-like                          |
| contig_6616  | Pdr-type ABC transporter-like                          |
| contig_7133  | Proton-dependent oligopeptide transport family protein |
| Ta_S32507418 | Ammonium transporter                                   |
| contig_279   | ABC transporter c family member 10-like isoform 2      |
| Ta_S13141198 | ABC transporter c family member 3-like                 |
| Ta_S32531820 | ABC transporter g family member 28-like                |
| contig_5109  | ABC transporter a family member 4                      |
| Ta_S58863047 | Mitochondrial phosphate transporter                    |
| contig_5629  | ABC transporter d family member                        |
| Ta_S50378052 | Lysine histidine transporter                           |
| Ta_S17889376 | Vacuolar amino acid transporter 1-like                 |
| contig_4051  | ABC transporter c family member 10-like isoform 2      |
| contig_4341  | Peptide transporter ptr2-like                          |

|              |                                                                |
|--------------|----------------------------------------------------------------|
| Ta_S22382486 | Pdr-like ABC transporter                                       |
| Ta_S17889510 | Transparent testa 12 protein                                   |
| Ta_S58851172 | Potassium transporter                                          |
| Ta_S16058073 | ABC transporter c family member 3-like                         |
| Ta_S58852047 | ABC transporter b family member                                |
| Ta_S52544358 | ABC transporter like protein                                   |
| Ta_S52544007 | Zip-like zinc transporter                                      |
| contig_5727  | Mdr-like ABC transporter                                       |
| Ta_S52542099 | Mate efflux family protein alf5-like                           |
| Ta_S17989006 | Nodulin 21 -like transporter protein                           |
| Ta_S58857667 | Pdr-like ABC transporter                                       |
| Ta_S22383057 | Peptide transporter ptr2-like                                  |
| contig_3530  | Pdr-like ABC transporter                                       |
| Ta_S26027462 | Membrane magnesium transporter 1-like                          |
| Ta_S22385862 | Vacuolar iron transporter-like protein                         |
| Ta_S16058124 | Ammonium transporter                                           |
| contig_3544  | At5g19640-like partial                                         |
| Ta_S22370841 | Mn-specific cation diffusion facilitator transporter           |
| Ta_S58843245 | Auxin efflux carrier family protein                            |
| Ta_S58897736 | Mate efflux family protein 5-like                              |
| Ta_S58860384 | Cation-chloride cotransporter 1-like                           |
| Ta_S52542689 | Peptide transporter                                            |
| Ta_S52545860 | Solute carrier family facilitated glucose transporter member 8 |
| Ta_S58862919 | ABC transporter c family member 10-like isoform 1              |
| Ta_S58893800 | Potassium transporter 7-like                                   |
| Ta_S52543797 | Multidrug pheromone mdr ABC transporter family                 |
| Ta_S58868699 | Magnesium transporter mrs2-4-like                              |
| Ta_S58851485 | Mrp-like ABC transporter                                       |
| contig_3705  | Gdp-mannose transporter gonst3-like                            |
| Ta_S20306454 | Peptide transporter ptr2-like                                  |
| Ta_S16258294 | ABC transporter d family member                                |
| contig_4293  | Major facilitator superfamily expressed                        |
| Ta_S58852795 | Plasma-membrane choline transporter-like protein               |

|              |                                                           |
|--------------|-----------------------------------------------------------|
| contig_3857  | D-xylose-proton symporter-like 2                          |
| Ta_S17985842 | Auxin efflux carrier                                      |
| contig_401   | ABC transporter c family member 10-like                   |
| Ta_S22391325 | Zinc transporter ztp29-like                               |
| Ta_S58881750 | Sulfate transporter                                       |
| Ta_S52542806 | Integral membrane transporter family protein              |
| Ta_S52546225 | Nucleobase-ascorbate transporter 6-like                   |
| Ta_S52543198 | Zinc transporter                                          |
| Ta_S58884802 | Pot family expressed                                      |
| contig_4887  | ABC transporter g family member 28-like                   |
| Ta_S58882139 | ABC transporter b family member 20-like                   |
| Ta_S58889949 | Iron-phytosiderophore transporter protein yellow stripe 1 |
| Ta_S58890717 | Peptide transporter ptr2-b                                |
| contig_4808  | ABC transporter c family member 8-like                    |
| Ta_S58870065 | General substrate transporter-like protein                |
| Ta_S58862614 | ABC transporter b family member mitochondrial-like        |
| Ta_S17865479 | ABC transporter c family member 3-like                    |
| contig_833   | ABC transporter b family member 19-like                   |
| Ta_S52543740 | ABC transporter family protein                            |
| contig_3504  | Pdr-like ABC transporter                                  |
| contig_5379  | Potassium transporter                                     |
| contig_6737  | Nodulin 21 -like transporter protein                      |
| Ta_S12923503 | ABC transporter b family member 11-like                   |
| Ta_S58899651 | Hexose transporter                                        |
| Ta_S13173768 | Mate efflux family protein alf5-like                      |
| Ta_S18943256 | Ammonium transporter                                      |
| contig_5770  | Carbohydrate transporter sugar porter transporter         |
| contig_2118  | Lysine histidine transporter 2-like                       |
| Ta_S58863243 | ABC transporter i family member chloroplastic-like        |
| Ta_S58884915 | Magnesium transporter nipa2-like                          |
| Ta_S12923309 | Na <sup>+</sup> H <sup>+</sup> antiporter                 |
| Ta_S58898758 | ABC transporter family protein                            |
| Ta_S58856407 | Potassium transporter 7-like                              |

|              |                                                           |
|--------------|-----------------------------------------------------------|
| Ta_S25791176 | Na <sup>+</sup> H <sup>+</sup> antiporter                 |
| contig_4378  | Probable metal-nicotianamine transporter ysl7-like        |
| Ta_S58883208 | Bidirectional sugar transporter sweet13-like              |
| Ta_S50371846 | Pdr-type ABC transporter                                  |
| Ta_S58906099 | ABC transporter c family member 8-like                    |
| Ta_S52543415 | Metal transporter nramp3-like                             |
| Ta_S52542983 | Magnesium transporter nipa2                               |
| Ta_S58863315 | Bile acid transporter 5                                   |
| Ta_S37760734 | Mate efflux family protein                                |
| contig_3540  | Peptide transporter ptr2-like                             |
| Ta_S16218736 | Adenosine 3 -phospho 5 -phosphosulfate transporter 1-like |
| contig_5035  | Cytochrome c biogenesis c                                 |
| Ta_S52546797 | Probable peptide nitrate transporter at1g59740-like       |
| contig_3765  | Sucrose transporter                                       |
| Ta_S58844672 | Metal transporter nramp6-like                             |
| contig_794   | Aluminum-activated malate transporter 9-like              |
| contig_3703  | Equilibrative nucleoside transporter 4-like               |
| Ta_S17977242 | ABC transporter i family member 17                        |
| Ta_S58896318 | Potassium transporter                                     |
| Ta_S58697407 | High-affinity potassium transporter                       |
| Ta_S17880402 | Integral membrane protein                                 |
| contig_4657  | Plastidic glucose transporter 4-like                      |
| Ta_S17898000 | Sugar transporter                                         |
| contig_3468  | Equilibrative nucleoside transporter                      |
| Ta_S52543186 | Peptide transporter ptr2-like                             |
| Ta_S52546866 | Inositol transporter 1                                    |
| contig_5750  | ABC transporter g family member 28-like                   |
| Ta_S52546249 | Cationic amino acid transporter                           |
| Ta_S17977147 | Polyol transporter 5-like                                 |
| Ta_S52546724 | Plastidic glucose transporter 4                           |
| Ta_S58893716 | Sucrose transporter                                       |
| Ta_S16058493 | Auxin efflux carrier component                            |
| Ta_S58902373 | ABC transporter c family member 2-like                    |

|              |                                                                |
|--------------|----------------------------------------------------------------|
| contig_2710  | ABC transporter c family member 10-like isoform 2              |
| Ta_S52543655 | Nucleobase-ascorbate transporter 6-like                        |
| Ta_S58860060 | ABC transporter family expressed                               |
| Ta_S52543040 | Probable metal-nicotianamine transporter ysl5-like             |
| Ta_S58896152 | Pdr-like ABC transporter                                       |
| Ta_S52546483 | K <sup>+</sup> efflux antiporter chloroplastic-like            |
| Ta_S58891022 | ABC transporter a family member 7-like                         |
| contig_5476  | Endoplasmic reticulum vesicle transporter protein              |
| Ta_S58897309 | ABC transporter d family member 1                              |
| Ta_S58885850 | Oligopeptide transporter                                       |
| Ta_S58909002 | ABC transporter c family member 10-like isoform 1              |
| contig_1481  | Solute carrier family facilitated glucose transporter member 8 |
| Ta_S37805390 | Monosaccharide transporter 1                                   |
| Ta_S52542911 | Organic anion transporter                                      |
| Ta_S58898904 | Uncharacterized transporter sl0355-like                        |
| contig_398   | ABC transporter b family member 19-like                        |
| Ta_S58900755 | Amino acid transporter                                         |
| Ta_S16227814 | Auxin efflux carrier                                           |
| Ta_S58853206 | Oligopeptide partial                                           |
| Ta_S17984911 | Mate efflux family protein 5-like                              |
| Ta_S58850992 | Lysine histidine transporter                                   |
| Ta_S52543924 | Major facilitator protein                                      |
| Ta_S22388588 | Zinc transporter ztp29-like                                    |
| contig_4848  | Cytochrome c biogenesis b                                      |
| contig_5671  | Yellow stripe-like transporter 14a                             |
| contig_422   | Pdr-like ABC transporter                                       |
| contig_2801  | Mdr-like ABC transporter                                       |
| Ta_S52544739 | ABC transporter family protein                                 |
| Ta_S58882086 | Hexose transporter                                             |
| contig_4842  | Pdr-like ABC transporter                                       |
| contig_2699  | Potassium efflux antiporter                                    |
| Ta_S58862613 | ABC transporter b family member mitochondrial-like             |
| Ta_S58863290 | Probable udp-sugar transporter protein slc35a4-like            |



|              |                                                          |
|--------------|----------------------------------------------------------|
| Ta_S52546529 | ABC transporter retinal flippase subfamily               |
| Ta_S26021526 | Probable anion transporter chloroplastic-like            |
| Ta_S58865002 | Plastidic ATP adp transporter                            |
| Ta_S58864112 | Peptide transporter ptr2-like                            |
| contig_3295  | ABC transporter b family member 20-like                  |
| Ta_S58896581 | Zip-like zinc transporter                                |
| Ta_S37750060 | Mitochondrial folate transporter carrier-like            |
| Ta_S58892345 | Polyol transporter 5-like                                |
| Ta_S58897268 | Amino acid transport protein                             |
| Ta_S16202616 | Nitrate transporter                                      |
| Ta_S16203140 | Oligopeptide transporter opt family                      |
| Ta_S52544226 | Zip transporter                                          |
| Ta_S22368567 | Probable anion transporter chloroplastic-like            |
| Ta_S13168998 | Peptide transporter ptr2-like                            |
| Ta_S22382874 | Hexose transporter                                       |
| contig_4383  | Citrate efflux mate transporter                          |
| Ta_S17889512 | Mate efflux                                              |
| Ta_S32629087 | Pot family expressed                                     |
| contig_576   | Na <sup>+</sup> dependent neutral amino acid transporter |
| Ta_S17984695 | Major facilitator superfamily expressed                  |
| Ta_S17889592 | Yellow stripe-like transporter 14a                       |
| Ta_S52542816 | Zinc transporter zip1                                    |
| Ta_S19225562 | Potassium transporter                                    |
| Ta_S16233185 | Magnesium transporter mrs2-1                             |
| Ta_S58889179 | Protein translocase protein transporter                  |
| Ta_S32585319 | Potassium transporter                                    |
| Ta_S58883080 | Mrp-like ABC transporter                                 |
| Ta_S58848588 | ABC transporter d family member 1-like                   |
| Ta_S22391437 | ABC transporter f family member 1-like                   |
| contig_591   | Mdr-like ABC transporter                                 |
| Ta_S58887521 | ABC transporter c family member 8-like                   |
| Ta_S16190121 | Copper transporter                                       |
| contig_2550  | ABC transporter b family member                          |

|              |                                                   |
|--------------|---------------------------------------------------|
| Ta_S13015346 | Pdr-like ABC transporter                          |
| Ta_S26020591 | Tlc ATP adp transporter                           |
| Ta_S52544186 | Copper ion transmembrane transporter              |
| Ta_S58882586 | Pdr-like ABC transporter                          |
| Ta_S52542652 | Transporter arsb-like                             |
| Ta_S58869496 | Nucleobase ascorbate transporter                  |
| Ta_S52544369 | Nitrate transporter                               |
| contig_1156  | Nucleotide-sugar transporter sugar porter         |
| contig_2141  | Metal-nicotianamine transporter ysl3              |
| Ta_S22383321 | Nitrate transporter                               |
| Ta_S16058118 | Sucrose transporter                               |
| Ta_S52543497 | Bidirectional sugar transporter sweet4-like       |
| contig_482   | Sucrose proton symporter                          |
| Ta_S52545939 | Polyol transporter 5-like                         |
| Ta_S32539927 | ABC transporter f family member 4-like            |
| contig_2531  | Potassium transporter                             |
| contig_5349  | High-affinity potassium transporter               |
| Ta_S58849771 | Pdr-like ABC transporter                          |
| contig_1101  | Sugar transporter erd6-like 5-like                |
| Ta_S52544662 | Boron transporter                                 |
| Ta_S58894070 | Carbohydrate transporter sugar porter transporter |
| Ta_S22379520 | Probable inositol transporter 2-like              |
| contig_1289  | Pot family expressed                              |
| Ta_S32509085 | ABC transporter family of the mitochondria family |
| Ta_S16058141 | Polyol transporter 5-like                         |
| Ta_S16058178 | Polyol transporter 5-like                         |
| Ta_S46892927 | Sucrose transporter 2                             |
| Ta_S58896990 | Sorbitol transporter                              |
| Ta_S52544273 | Ca <sup>2+</sup> antiporter cation exchanger      |
| contig_3747  | ABC transporter b family member 11-like           |
| contig_3261  | Probable potassium transporter 11-like            |
| contig_2993  | ABC transporter a family member 7-like            |
| Ta_S16196497 | Vacuolar iron transporter-like protein            |

|              |                                                                |
|--------------|----------------------------------------------------------------|
| contig_768   | Probable metal-nicotianamine transporter ysl6-like isoform 2   |
| Ta_S52545162 | Nitrite transporter                                            |
| Ta_S58903343 | Bile acid Na <sup>+</sup> symporter family protein             |
| Ta_S16200898 | ABC transporter g family member 14-like                        |
| contig_2920  | ABC transporter family protein                                 |
| contig_5378  | Solute carrier family facilitated glucose transporter member 8 |
| contig_5545  | Mdr-like ABC transporter                                       |
| Ta_S58857435 | High-affinity potassium transporter                            |
| Ta_S58898829 | ABC transporter c family member 10-like isoform 1              |
| Ta_S32668167 | Protein translocase protein transporter                        |
| Ta_S58893108 | GDP-mannose transporter gonst3-like                            |
| Ta_S58850908 | Proline transporter                                            |
| Ta_S52546402 | Peptide transporter ptr2-like                                  |
| Ta_S58907002 | Lysine histidine transporter 1                                 |
| Ta_S17888698 | Magnesium transporter nipa2-like                               |
| Ta_S26025085 | Vacuolar iron transporter                                      |
| Ta_S52545145 | Phosphate transporter 4                                        |
| contig_4459  | Magnesium transporter nipa2-like                               |
| contig_3982  | Multidrug resistance protein ABC transporter family            |
| Ta_S52544230 | Nodulin 21 -like transporter family protein                    |
| Ta_S52546064 | Probable metal-nicotianamine transporter ysl9-like             |
| Ta_S52541759 | Ammonium transporter                                           |
| Ta_S18660952 | Almt1                                                          |
| Ta_S58896944 | Plastidic ATP adp transporter                                  |
| Ta_S58890400 | ABC transporter d family member 1                              |
| Ta_S52545074 | Magnesium transporter                                          |
| Ta_S37853592 | Metal-nicotianamine transporter ysl3                           |
| contig_6490  | ABC transporter b family member 4-like                         |
| Ta_S58904749 | Peptide transporter ptr2-like                                  |
| contig_4503  | ABC transporter family pleiotropic drug resistance protein     |
| Ta_S13117656 | Potassium transporter                                          |
| contig_6407  | Mdr-like ABC transporter                                       |
| Ta_S22380881 | Cation efflux protein zinc                                     |

|              |                                                                |
|--------------|----------------------------------------------------------------|
| Ta_S52544260 | ABC transporter g family member 7                              |
| Ta_S58859924 | Plastidic glucose transporter 4-like                           |
| contig_5944  | ABC transporter family expressed                               |
| Ta_S52898599 | Sulfate transporter                                            |
| Ta_S58867285 | ABC transporter c family member 10-like isoform 2              |
| contig_2869  | ABC transporter b family member 11-like                        |
| Ta_S52546291 | Potassium transporter                                          |
| Ta_S58868856 | ATP-binding cassette transporter                               |
| Ta_S17975072 | ABC transporter g family member 14-like                        |
| Ta_S58903049 | Sulfate transporter                                            |
| Ta_S58883174 | Sucrose transporter 2                                          |
| contig_382   | Oligopeptide transporter                                       |
| Ta_S13015725 | Peptide transporter ptr2-like                                  |
| contig_1770  | ABC transporter b family member 19-like                        |
| Ta_S37854042 | Mate efflux family protein 5-like                              |
| Ta_S22372247 | Protein ruptured pollen grain                                  |
| Ta_S58856968 | Yellow stripe-like transporter 12                              |
| contig_2043  | ABC transporter c family member 3-like                         |
| Ta_S37910108 | Potassium efflux antiporter                                    |
| Ta_S12964828 | Multidrug resistance protein ABC transporter family            |
| Ta_S58859226 | Sugar transporter erd6-like 4-like isoform 1                   |
| Ta_S52544989 | Plastidic general dicarboxylate transporter                    |
| contig_251   | Multidrug pheromone mdr ABC transporter family                 |
| Ta_S52542701 | Peptide transporter ptr2-like                                  |
| Ta_S32562893 | Potassium transporter 25-like                                  |
| contig_6744  | UDP-glucuronic acid udp-n-acetylgalactosamine transporter-like |
| Ta_S16058200 | Peptide transporter ptr3-a-like                                |
| Ta_S17888837 | Probable peptide nitrate transporter at3g43790-like            |
| Ta_S58854345 | ABC transporter b family member chloroplastic-like             |
| Ta_S52543889 | Iron-phytosiderophore transporter protein yellow stripe 1      |
| contig_1273  | Pdr-like ABC transporter                                       |
| Ta_S52543195 | Ca <sup>2+</sup> antiporter cation exchanger                   |
| contig_2645  | Dma efflux transporter                                         |

|              |                                                                                 |
|--------------|---------------------------------------------------------------------------------|
| Ta_S58907003 | Lysine histidine transporter 1-like                                             |
| Ta_S37913018 | Mate efflux                                                                     |
| Ta_S58896651 | Yellow stripe-like transporter 14a                                              |
| Ta_S58896102 | Aluminum-activated malate transporter 9-like                                    |
| Ta_S12970099 | ABC transporter i family member chloroplastic-like                              |
| Ta_S58885343 | Endoplasmic reticulum vesicle transporter protein                               |
| Ta_S37851284 | ABC transporter b family member                                                 |
| Ta_S58869512 | ABC transporter c family member 5-like                                          |
| Ta_S37829864 | Polyol transporter 5-like                                                       |
| Ta_S58892190 | Zinc transporter at3g08650-like                                                 |
| contig_1968  | ABC transporter b family member 20-like                                         |
|              | Iron -phytosiderophore uptake mediator (yellow stripe like transporter) partial |
| Ta_S26028369 |                                                                                 |
| contig_3983  | Equilibrative nucleoside transporter                                            |
| Ta_S58888513 | Proline transporter                                                             |
| contig_253   | D-xylose-proton symporter-like 2                                                |
| Ta_S41658097 | Zinc transporter                                                                |
| Ta_S26022895 | Carbohydrate transporter sugar porter transporter                               |
| contig_153   | ABC transporter b family member 4-like                                          |
| Ta_S58899261 | Zinc transporter                                                                |
| contig_4465  | Equilibrative nucleoside transporter 3-like                                     |
| Ta_S12940628 | ABC transporter b family member 11-like                                         |
| Ta_S58869510 | ABC transporter c family member 5-like                                          |
| Ta_S58883250 | ABC transporter b family member mitochondrial-like                              |
| contig_1511  | ABC transporter c family protein                                                |
| Ta_S58901391 | Lysine histidine transporter 1-like                                             |
| Ta_S22374020 | Peptide transporter ptr2-like                                                   |
| contig_3169  | Uncharacterized transporter ybr287w-like                                        |
| Ta_S17974709 | ABC transporter b family member 4-like                                          |
| Ta_S37769891 | Organic cation transporter                                                      |
| Ta_S52543394 | Potassium transporter 25-like                                                   |
| Ta_S37761576 | Peptide transporter ptr2                                                        |
| Ta_S52542399 | Magnesium transporter -like family protein                                      |

|              |                                                              |
|--------------|--------------------------------------------------------------|
| Ta_S52545672 | ABC transporter b family member 19-like                      |
| Ta_S18957412 | Auxin efflux carrier                                         |
| contig_5784  | ABC transporter c family member 9-like                       |
| contig_5043  | Peptide transporter ptr2-like                                |
| contig_4214  | Multidrug resistance protein                                 |
| Ta_S58890043 | Aluminum activated citrate transporter                       |
| Ta_S52541389 | Peptide transporter ptr2-b                                   |
| Ta_S58868892 | Adenosine 3 -phospho 5 -phosphosulfate transporter 1-like    |
| Ta_S52544227 | ABC transporter c family member 4-like                       |
| Ta_S58905498 | Iron-sulfur cluster assembly protein                         |
| Ta_S58897399 | Probable metal-nicotianamine transporter ysl6-like isoform 1 |
| Ta_S58895728 | ABC transporter family protein                               |
| Ta_S12976373 | ABC transporter b family member 11-like                      |
| Ta_S58897923 | ABC transporter f family member 1-like                       |
| Ta_S24513076 | ABC transporter g family member 14-like                      |
| Ta_S52547083 | Pdr-like ABC transporter                                     |
| Ta_S41658095 | Cadmium zinc-transporting atpase 3-like                      |
| Ta_S58852208 | Udp-galactose transporter 2-like                             |
| Ta_S17889694 | Organic anion transporter                                    |
| Ta_S12923308 | Na <sup>+</sup> h <sup>+</sup> antiporter                    |
| Ta_S52542448 | Pdr-like ABC transporter                                     |
| Ta_S12888527 | Plastidic ATP adp transporter                                |
| contig_6754  | ABC transporter c family member 5-like                       |
| Ta_S16058102 | Sulfate transporter                                          |
| Ta_S37826729 | Nitrate transporter -like                                    |
| contig_1656  | Peptide transporter 1                                        |
| Ta_S37807331 | Amino acid transporter                                       |
| Ta_S16058101 | Zinc transporter                                             |
| contig_2095  | ABC glycine betaine l-proline atpase subunit                 |
| Ta_S52545804 | Na <sup>+</sup> dependent neutral amino acid transporter     |
| Ta_S52542491 | Choline transporter-like protein 2-like                      |
| contig_5135  | Cytochrome c biogenesis c                                    |
| Ta_S58897618 | Auxin efflux carrier-like protein                            |

|              |                                                |
|--------------|------------------------------------------------|
| Ta_S52543425 | Potassium transporter 8-like                   |
| Ta_S26027017 | Udp-galactose transporter 1-like               |
| Ta_S13165195 | Uncharacterized transporter lpg1691-like       |
| contig_6614  | Multidrug pheromone mdr ABC transporter family |
| contig_4326  | Proline transporter                            |
| Ta_S58887505 | Cation cation antiporter                       |
| Ta_S52546511 | Integral membrane protein like                 |
| Ta_S26026815 | High-affinity nitrate transporter -like        |
| Ta_S52543807 | Peptide transporter ptr2-like                  |
| Ta_S52542608 | Sucrose transporter                            |

<sup>a</sup> Fold-change in red indicates lower level of expression in colonized wheat roots (CWR); (+)ND not expressed in the N-IWR libraries; Up-regulated, Down-regulated and Expressed ESTs are shading in red, blue and yellow respectively.
