# Supplementary material for: Dual RNA-seq transcriptional analysis of wheat roots colonized by Azospirillum brasilense reveals up-regulation of nutrient acquisition and cell cycle genes
Source: PubMed Central journal article supplement (PMC4042000; doi:10.1186/1471-2164-15-378), 2014-05-16
Supplement: 12864_2013_6083_MOESM12_ESM.pdf [file 12864_2013_6083_MOESM12_ESM.pdf]

**Table S10** ESTs of *Triticum aestivum* encoding proteins that were grouped in transport activity by GO analysis

| Sequence ID                                                            | Fold<br>change | p-value | Sequences Description                                       |
|------------------------------------------------------------------------|----------------|---------|-------------------------------------------------------------|
| <b><i>Up-regulated ESTs (fold change&gt;2, p-value&lt; 0.05)</i></b>   |                |         |                                                             |
| contig_2239                                                            | 4.5            | 0.0009  | ABC transporter b family member 20-like                     |
| contig_5105                                                            | 5.0            | 0.0024  | Calcium-transporting ATPase plasma membrane-type-like       |
| Ta_S58899343                                                           | 3.1            | 0.0037  | Metal transporter nramp6-like                               |
| contig_5883                                                            | 3.6            | 0.0073  | Amino acid permease family expressed                        |
| Ta_S17976596                                                           | 3.1            | 0.0089  | Sulphate transporter                                        |
| Ta_S13177057                                                           | 4.2            | 0.0091  | Nitrate transmembrane transporter next1-like                |
| Ta_S58842370                                                           | 4.0            | 0.0155  | GDP-mannose transporter                                     |
| contig_6340                                                            | 2.1            | 0.0166  | Hypothetical Protein                                        |
| Ta_S32501583                                                           | 3.4            | 0.0168  | Hypothetical Protein                                        |
| Ta_S17897607                                                           | 2.9            | 0.0182  | Major facilitator protein                                   |
| contig_2635                                                            | 2.4            | 0.0202  | ABC transporter c family member 9-like                      |
| Ta_S58894107                                                           | 3.2            | 0.0245  | Amino acid permease                                         |
| Ta_S32626973                                                           | 2.6            | 0.0292  | Peptide transporter (ptr2-like)                             |
| contig_6114                                                            | 3.4            | 0.0315  | Mac perforin domain containing protein                      |
| contig_4225                                                            | 2.1            | 0.0360  | Calcium-transporting ATPase endoplasmic reticulum-type-like |
| Ta_S12971663                                                           | 2.0            | 0.0367  | Carrier protein                                             |
| contig_6109                                                            | 2.2            | 0.0394  | Probable importin subunit beta-4-like                       |
| Ta_S58895262                                                           | 2.4            | 0.0412  | Hypothetical Protein                                        |
| Ta_S13172731                                                           | 3.2            | 0.0469  | Cytochrome c oxidase polypeptide vib                        |
| <b><i>Down-regulated ESTs (fold change&gt;2, p-value&lt; 0.05)</i></b> |                |         |                                                             |
| contig_6543                                                            | 3.9            | 0.0247  | ABC transporter g family member 16-like                     |
| Ta_S32529059                                                           | 3.8            | 0.0445  | P-glycoprotein 1                                            |
| Ta_S58884172                                                           | 3.7            | 0.0190  | Sugar transporter family expressed                          |
| contig_5892                                                            | 3.1            | 0.0328  | TGF-beta type III extracellular region                      |
| contig_4736                                                            | 2.9            | 0.0458  | Transparent testa 12 protein                                |
| Ta_S17897290                                                           | 2.6            | 0.0037  | Nascent polypeptide associated complex alpha chain          |
| Ta_S52546220                                                           | 2.6            | 0.0388  | Tonoplast intrinsic                                         |
| Ta_S58902262                                                           | 2.6            | 0.0068  | Tonoplast intrinsic protein                                 |
| contig_5852                                                            | 2.3            | 0.0059  | Importin subunit beta-1-like                                |

|              |     |        |                                           |
|--------------|-----|--------|-------------------------------------------|
| Ta_S17987082 | 2.3 | 0.0207 | Aquaporin tip4-1                          |
| Ta_S17890271 | 2.3 | 0.0392 | H <sup>+</sup> Ca <sup>2+</sup> exchanger |
| Ta_S22381224 | 2.2 | 0.0450 | Potassium transporter 25-like             |
| contig_4802  | 2.2 | 0.0257 | Ap-2 complex subunit sigma-like           |
| contig_3386  | 2.2 | 0.0127 | Heavy metal p-type ATPase                 |
| Ta_S52544369 | 1.8 | 0.0143 | Nitrate transporter                       |

### *Expressed ESTs*

|              |                                                       |
|--------------|-------------------------------------------------------|
| Ta_S58863349 | ABC transporter                                       |
| Ta_S13199552 | Not found                                             |
| Ta_S16058169 | Ammonium transporter amt2                             |
| contig_5490  | ABC transporter c family member 9-like                |
| Ta_S16255717 | Protein                                               |
| contig_3974  | Peptide transporter                                   |
| Ta_S26020880 | Sugar transporter family expressed                    |
| Ta_S13110775 | Amino acid transporter a1                             |
| contig_5564  | Potassium channel skor-like                           |
| contig_2606  | Phospholipid-transporting ATPase 4-like               |
| Ta_S22371202 | Cation efflux family protein                          |
| contig_4963  | Cyclic nucleotide-gated ion channel 1-like            |
| contig_4634  | Clathrin assembly protein ap19 homolog                |
| contig_3070  | Importin subunit beta-1-like                          |
| contig_4259  | Exportin-1-like isoform 2                             |
| Ta_S32660745 | Sec14 cytosolic                                       |
| contig_487   | Phospholipid-translocating ATPase                     |
| contig_5460  | Armadillo beta-catenin-like repeat-containing protein |
| contig_4243  | ABC transporter d family member                       |
| contig_5051  | Calcium-transporting ATPase plasma membrane-type-like |
| Ta_S17979060 | Metal transporter nramp5-like                         |
| contig_7128  | Peptide transporter expressed                         |
| Ta_S58865243 | Protein transport protein sec61 subunit alpha         |
| contig_4020  | Coatomer alpha                                        |
| Ta_S22385099 | Mannitol dehydrogenase                                |
| contig_5935  | Ap3-complex subunit beta-a-like                       |

|              |                                                                           |
|--------------|---------------------------------------------------------------------------|
| Ta_S58842035 | At1g30450-like partial                                                    |
| Ta_S13047749 | Metal tolerance protein c1                                                |
| Ta_S12920463 | PREDICTED: uncharacterized protein LOC100822706 [Brachypodium distachyon] |
| contig_6625  | Replication factor c subunit 3-like                                       |
| Ta_S58889910 | Serine threonine protein kinase                                           |
| contig_3978  | Peptide transporter ptr2-like                                             |
| Ta_S17987948 | Novel plant snare expressed                                               |
| Ta_S32518913 | Ap-3 complex subunit mu-1-like                                            |
| contig_293   | Hypothetical protein osj_04420 [Oryza sativa Japonica Group]              |
| contig_4602  | Vacuolar proton translocating ATPase 100 kda subunit-like isoform 1       |
| Ta_S17985880 | Peptide transporter ptr2-like                                             |
| Ta_S12891430 | Pentatricopeptide repeat-containing protein mitochondrial-like            |
| contig_2461  | Calcium-transporting ATPase plasma membrane-type-like                     |
| contig_283   | Exportin 1a                                                               |
| contig_6592  | ABC transporter b family member 20-like                                   |
| Ta_S52543465 | Udp-galactose transporter 3                                               |
| contig_3879  | Phospholipid-translocating ATPase                                         |
| Ta_S22377863 | Cytochrome c oxidase polypeptide vb                                       |
| contig_3442  | Atvps11 protein                                                           |
| contig_1940  | Vacuolar ATPase b subunit                                                 |
| Ta_S58867287 | Multidrug resistance protein ABC transporter family                       |
| contig_3999  | ABC transporter c family member 10-like isoform 2                         |
| contig_3739  | Tim17 domain-containing protein                                           |
| contig_2758  | Vacuolar ATPase subunit h protein                                         |
| Ta_S58840467 | ABC transporter f family member 4-like                                    |
| contig_809   | Na <sup>+</sup> h <sup>+</sup> antiporter                                 |
| contig_1558  | Golgin candidate 6-like                                                   |
| Ta_S52541753 | Hippocampus abundant transcript 1                                         |
| contig_2773  | Pdr-type ABC transporter-like                                             |
| Ta_S52543393 | Udp-galactose transporter 6                                               |
| contig_1559  | Golgin candidate 6-like                                                   |
| contig_5394  | Cation-transporting ATPase                                                |

|              |                                                                |
|--------------|----------------------------------------------------------------|
| contig_5315  | Pinus taeda anonymous locus 0_4543_02 genomic sequence         |
| contig_2316  | Multidrug resistance p-glycoprotein                            |
| Ta_S58896279 | Mate efflux                                                    |
| contig_5555  | Exportin 1a                                                    |
| contig_3981  | Exportin1 protein                                              |
| contig_3901  | Cyclic nucleotide-gated calmodulin-binding ion channel         |
| contig_3156  | Mate efflux family protein alf5                                |
| Ta_S58897641 | Plastidic glucose transporter 4                                |
| contig_3428  | Solute carrier family facilitated glucose transporter member 8 |
| Ta_S52546551 | Ubiquinone biosynthesis protein ubib                           |
| Ta_S58856739 | Phospholipid-transporting ATPase 1-like                        |
| Ta_S13144969 | Clathrin coat assembly protein                                 |
| contig_2684  | Ca <sup>2+</sup> transporting ATPase                           |
| Ta_S52547070 | Aquaporin sip2-1                                               |
| Ta_S18943257 | Ammonium transporter                                           |
| Ta_S52542319 | ATP -ADP translocator                                          |
| contig_2754  | Xanthine uracil vitamin c partial                              |
| Ta_S26024704 | Ubiquinol-cytochrome c reductase complex kda protein           |
| Ta_S13022773 | Cytochrome c oxidase subunit vb                                |
| Ta_S58889324 | Na <sup>+</sup> H <sup>+</sup> antiporter                      |
| Ta_S13001517 | Phospholipid-transporting ATPase 1-like                        |
| Ta_S37946965 | Proton-dependent oligopeptide or low-affinity nitrate partial  |
| contig_1993  | Importin subunit beta-1-like                                   |
| Ta_S17981933 | At1est8-like partial                                           |
| Ta_S16238874 | Metal tolerance protein                                        |
| contig_4846  | Plastidic glucose transporter 4                                |
| contig_1260  | At3g28860-like partial                                         |
| Ta_S58891441 | ATPase subunit 8                                               |
| Ta_S37854107 | Potassium transporter                                          |
| Ta_S58895683 | Nitrate transporter -like                                      |
| contig_5863  | Cytochrome c oxidase polypeptide vc                            |
| Ta_S52543388 | Transmembrane expressed                                        |
| Ta_S13126051 | Pdr-like ABC transporter                                       |

|              |                                                                |
|--------------|----------------------------------------------------------------|
| Ta_S13130526 | ADP-ribosylation factor                                        |
| contig_6771  | Protein real-time-like isoform 1                               |
| Ta_S17895518 | Phospholipid-transporting ATPase 3-like                        |
| Ta_S52545526 | Sec14 cytosolic factor-like                                    |
| contig_5308  | Calcium-transporting ATPase plasma membrane-type               |
| contig_1249  | Solute carrier family facilitated glucose transporter member 8 |
| Ta_S58885140 | Synaptic vesicle 2-related                                     |
| contig_3250  | V-type proton ATPase 116 kda subunit a isoform 1-like          |
| contig_3753  | Glutamate synthase 1                                           |
| Ta_S17890420 | Proline transporter 1                                          |
| Ta_S17892686 | ATP synthase d mitochondrial                                   |
| Ta_S22496174 | Na <sup>+</sup> h <sup>+</sup> antiporter                      |
| Ta_S58904481 | ADP-ribosylation factor                                        |
| contig_555   | Equilibrative nucleoside transporter                           |
| Ta_S13166508 | Vacuolar protein sorting-associated protein 28-1               |
| contig_3830  | ABC transporter c family member 10-like isoform 2              |
| Ta_S26022555 | Tonoplast intrinsic protein                                    |
| Ta_S13147100 | Ubiquinol-cytochrome c reductase complex kda protein           |
| Ta_S58886024 | Probable ion channel castor-like                               |
| contig_2332  | Multidrug pheromone mdr ABC transporter family                 |
| contig_5435  | Protein transparent testa 12-like                              |
| Ta_S58842340 | Multidrug resistance protein ABC transporter family            |
| Ta_S52543467 | Uncharacterized amino acid permease -like                      |
| Ta_S13010915 | Protein                                                        |
| Ta_S52542790 | Snare-interacting protein keule                                |
| contig_3839  | Plasma membrane ATPase                                         |
| Ta_S58883662 | Aquaporin nip1-2                                               |
| contig_5119  | Peptide transporter 1                                          |
| Ta_S52546890 | Mac perforin domain containing protein                         |
| contig_5580  | ABC transporter b family member 20-like                        |
| contig_4276  | P-type ATPase                                                  |
| Ta_S58855059 | Mitochondrial import inner membrane translocase subunit tim8   |
| Ta_S58867686 | Mitochondrial import inner membrane translocase subunit tim22  |

|              |                                                            |
|--------------|------------------------------------------------------------|
| Ta_S58902937 | 2-on-2 hemoglobin                                          |
| contig_1208  | ABC transporter d family member                            |
| Ta_S32585634 | Mdr-like ABC transporter                                   |
| contig_4668  | Coatomer alpha subunit                                     |
| Ta_S58897308 | ABC transporter d family member 1                          |
| Ta_S17898791 | Dmi1 protein                                               |
| Ta_S22385774 | Ap-4 complex subunit sigma-1                               |
| Ta_S26024082 | GTP-binding protein sar1a                                  |
| contig_2727  | Cytochrome c oxidase subunit                               |
| Ta_S16058108 | Sec14-like protein 1                                       |
| Ta_S13021939 | Sulphate transporter                                       |
| Ta_S52544693 | Calcium-transporting ATPase plasma membrane-type-like      |
| Ta_S50389128 | Peptide transporter ptr2-like                              |
| Ta_S37823111 | Pinus taeda anonymous locus 0_8694_01 genomic sequence     |
| Ta_S37777140 | Heat intolerant 1 protein                                  |
| contig_2537  | Hypothetical protein                                       |
| Ta_S58899451 | Cytochrome c oxidase subunit 1                             |
| contig_2816  | Probable importin-7 homolog                                |
| Ta_S58869513 | Multidrug resistance protein ABC transporter family        |
| Ta_S58887009 | Pyrophosphate-energized membrane proton pump 2             |
| Ta_S17988968 | Phospholipid-transporting ATPase 9-like                    |
| Ta_S52545704 | Porin voltage-dependent anion-selective channel protein    |
| Ta_S32528722 | Myosin-j heavy chain-like                                  |
| Ta_S58894270 | NADH dehydrogenase                                         |
| Ta_S17987431 | Potassium transporter                                      |
| Ta_S13128371 | Ureide permease                                            |
| Ta_S58864836 | Mitochondrial carnitine acylcarnitine carrier-like protein |
| Ta_S58867846 | Plasma membrane calcium-transporting ATPase                |
| Ta_S22389536 | Anion channel protein                                      |
| contig_2444  | Coatomer alpha subunit                                     |
| Ta_S52542003 | Peptide transporter ptr2-like                              |
| Ta_S22378357 | Protein transport protein sec61 subunit alpha              |
| Ta_S32610474 | Pii protein                                                |

|              |                                                               |
|--------------|---------------------------------------------------------------|
| Ta_S58869511 | ABC transporter c family member 5-like                        |
| Ta_S58902065 | Protein transport protein sec24-like at3g07100-like           |
| Ta_S58866161 | K(+) efflux antiporter 6-like                                 |
| contig_3756  | Armadillo beta-catenin-like repeat-containing protein         |
| Ta_S52541510 | Metal tolerance protein                                       |
| Ta_S13114500 | Cyclic nucleotide gated channel                               |
| Ta_S13145384 | Cytochrome c oxidase polypeptide vc                           |
| Ta_S16057927 | ABC transporter b family member 4-like                        |
| Ta_S17988485 | Aluminum activated citrate transporter                        |
| Ta_S58868804 | ATPase subunit 1                                              |
| contig_618   | Calcium-transporting ATPase plasma membrane- expressed        |
| Ta_S16057986 | Mate efflux family protein 7-like                             |
| Ta_S50384859 | Apocytochrome b                                               |
| Ta_S13256283 | Amino acid transporter                                        |
| contig_1668  | Importin subunit beta-1-like                                  |
| contig_1452  | Aluminum-activated citrate transporter                        |
| Ta_S52545313 | Peroxisomal carrier protein                                   |
| Ta_S16058470 | Zinc transporter                                              |
| Ta_S58869503 | Cytochrome c oxidase subunit 3                                |
| contig_2876  | D-xylose-proton symporter-like 2                              |
| Ta_S37802999 | Mate efflux family expressed                                  |
| contig_4261  | ABC transporter family expressed                              |
| contig_7157  | Shaker-like potassium channel                                 |
| Ta_S52544037 | Metal-transporting p-type ATPase                              |
| contig_4049  | Phospholipid-transporting ATPase 1-like                       |
| Ta_S12922951 | ATP synthase beta chain                                       |
| Ta_S58860395 | Cation-chloride cotransporter 1-like                          |
| Ta_S17989018 | ABC transporter family protein                                |
| Ta_S58882237 | Phospholipid-transporting ATPase 1-like                       |
| Ta_S26026288 | Mitochondrial import inner membrane translocase subunit tim17 |
| contig_921   | Phospholipid-transporting ATPase 3-like                       |
| Ta_S26025080 | ATP synthase subunit h protein                                |
| contig_6128  | Adaptor-related protein complex ap- beta 2 subunit            |

|              |                                                                             |
|--------------|-----------------------------------------------------------------------------|
| contig_82    | Autoinhibited calcium ATPase                                                |
| Ta_S13000822 | Probable cyclic nucleotide-gated ion channel 17-like                        |
| Ta_S58861424 | Vacuolar amino acid transporter 1-like                                      |
| Ta_S13058142 | ABC transporter c family member 10-like isoform 2                           |
| Ta_S26028510 | Phosphate phosphoenolpyruvate translocator                                  |
| Ta_S58858831 | ABC transporter a family member 7-like                                      |
| Ta_S58843930 | Armadillo beta-catenin-like repeat-containing protein                       |
| Ta_S52542739 | Protein toc75                                                               |
| contig_1686  | Pleckstrin homology domain family a                                         |
| contig_4157  | Exportin 1a                                                                 |
| Ta_S58859647 | Outer envelope protein                                                      |
| Ta_S58858982 | Glutamate receptor -like                                                    |
| contig_4199  | Vacuolar proton                                                             |
| Ta_S58896454 | Armadillo beta-catenin-like repeat-containing protein                       |
| Ta_S26027328 | Peptide transporter ptr2-like                                               |
| Ta_S19225168 | Cation-chloride cotransporter                                               |
| Ta_S17981975 | Protein                                                                     |
| Ta_S58843363 | Potassium transporter 11-like                                               |
| contig_5961  | Phosphatidylinositol phosphatidylcholine transfer protein                   |
| contig_4983  | Vacuolar protein sorting-associated protein 11 homolog                      |
| Ta_S17986258 | Transparent testa 12 protein                                                |
| Ta_S32507418 | Ammonium transporter                                                        |
| Ta_S58891463 | Cytochrome c biogenesis fn                                                  |
| Ta_S30065904 | Transportin-3-like isoform 1                                                |
| Ta_S52543897 | Plasma membrane h <sup>+</sup> ATPase                                       |
| Ta_S52543572 | Sec1 family transport protein sly1                                          |
| contig_115   | Calcium-transporting ATPase plasma membrane- expressed                      |
| contig_5221  | Major facilitator superfamily expressed                                     |
| Ta_S26026246 | Transmembrane emp24 domain-containing protein                               |
| Ta_S52543811 | Chloride channel protein clc-f-like                                         |
| Ta_S13141198 | ABC transporter c family member 3-like                                      |
| Ta_S22370202 | Ubiquinol-cytochrome c reductase complex ubiquinone-binding protein<br>qp-c |



|              |                                                                |
|--------------|----------------------------------------------------------------|
| contig_5109  | ABC transporter a family member 4                              |
| contig_5629  | ABC transporter d family member                                |
| Ta_S52541148 | Puromycin-sensitive aminopeptidase-like                        |
| Ta_S12863029 | V-type proton ATPase catalytic subunit a                       |
| Ta_S17984922 | Protein transport protein sec61 beta subunit                   |
| Ta_S37893286 | Delta tonoplast intrinsic protein tip2 2                       |
| Ta_S58905410 | V-type proton ATPase subunit d2                                |
| Ta_S52543264 | Nucleolar GTP-binding protein 1-like                           |
| contig_4051  | ABC transporter c family member 10-like isoform 2              |
| Ta_S58867588 | Armadillo beta-catenin-like repeat-containing protein          |
| Ta_S24623161 | Multicatalytic endopeptidase complex alpha subunit-like        |
| contig_4341  | Peptide transporter ptr2-like                                  |
| Ta_S37865890 | Vacuolar protein sorting-associated protein 55-like protein    |
| contig_4961  | Phospholipid-transporting ATPase 1-like                        |
| Ta_S16237305 | Ap-2 complex subunit alpha-1                                   |
| Ta_S12923277 | Triose phosphate phosphate translocator                        |
| Ta_S52546317 | Acyl-acyl thioesterase                                         |
| Ta_S26021646 | Coatomer alpha subunit                                         |
| Ta_S17889510 | Transparent testa 12 protein                                   |
| Ta_S58851172 | Potassium transporter                                          |
| Ta_S52541132 | Low quality protein: uncharacterized amino-acid permease -like |
| Ta_S16058073 | ABC transporter c family member 3-like                         |
| Ta_S58904255 | ATPase subunit 4                                               |
| Ta_S58865239 | Protein transport protein sec61 subunit alpha-like             |
| contig_6125  | Nod26-like membrane integral protein                           |
| Ta_S58888287 | Phospholipid-transporting ATPase 9-like                        |
| Ta_S58852047 | ABC transporter b family member                                |
| Ta_S52544358 | ABC transporter like protein                                   |
| Ta_S52544007 | Zip-like zinc transporter                                      |
| contig_5727  | Mdr-like ABC transporter                                       |
| contig_3955  | Coatomer alpha                                                 |
| Ta_S52542099 | Mate efflux family protein alf5-like                           |
| Ta_S58904463 | Protein transport protein sec61 subunit alpha                  |

|              |                                                                     |
|--------------|---------------------------------------------------------------------|
| contig_4428  | Vacuolar proton translocating ATPase 100 kda subunit-like isoform 1 |
| Ta_S17888422 | Adp-ribosylation factor 1                                           |
| contig_3563  | Vacuolar ATPase b subunit                                           |
| Ta_S22381642 | Ap-3 complex subunit sigma                                          |
| Ta_S58839445 | Dna replication licensing factor mcm5-a-like                        |
| Ta_S52547015 | Amino acid permease 1                                               |
| Ta_S22383057 | Peptide transporter ptr2-like                                       |
| Ta_S12891362 | Carrier protein                                                     |
| Ta_S52545515 | Nuclear pore complex protein nup98-nup96-like isoform 1             |
| Ta_S58899507 | Spinster-like protein                                               |
| Ta_S16058124 | Ammonium transporter                                                |
| contig_2791  | Aminophospholipid ATPase                                            |
| contig_3544  | At5g19640-like partial                                              |
| contig_1309  | Adenine nucleotide translocator                                     |
| Ta_S22370841 | Mn-specific cation diffusion facilitator transporter                |
| Ta_S58843245 | Auxin efflux carrier family protein                                 |
| Ta_S58886750 | Sucrose transport protein suc3                                      |
| Ta_S58897736 | Mate efflux family protein 5-like                                   |
| contig_2996  | Pleiotropic drug resistance protein                                 |
| Ta_S58860384 | Cation-chloride cotransporter 1-like                                |
| Ta_S52542689 | Peptide transporter                                                 |
| contig_899   | Heavy metal ATPase                                                  |
| Ta_S58899231 | Phospholipid-transporting ATPase 3-like                             |
| Ta_S52545925 | Uncharacterized amino acid permease -like                           |
| Ta_S58907622 | Cytochrome c oxidase subunit 2                                      |
| Ta_S52544086 | Protein                                                             |
| Ta_S52545860 | Solute carrier family facilitated glucose transporter member 8      |
| Ta_S12870538 | Plasma membrane intrinsic protein                                   |
| Ta_S58902933 | Ureide permease 2                                                   |
| Ta_S58862919 | ABC transporter c family member 10-like isoform 1                   |
| Ta_S58893800 | Potassium transporter 7-like                                        |
| Ta_S52543797 | Multidrug pheromone mdr ABC transporter family                      |
| contig_4125  | Chromosome region maintenance protein 1                             |

|              |                                                                     |
|--------------|---------------------------------------------------------------------|
| Ta_S58868699 | Magnesium transporter mrs2-4-like                                   |
| contig_3331  | Vacuolar ATPase subunit h protein                                   |
| Ta_S58851485 | Mrp-like ABC transporter                                            |
| Ta_S52544923 | Transport protein                                                   |
| Ta_S58906320 | Plasma membrane h <sup>+</sup> -ATPase                              |
| Ta_S20306454 | Peptide transporter ptr2-like                                       |
| Ta_S58904592 | Rnase I inhibitor-like protein                                      |
| Ta_S16258294 | ABC transporter d family member                                     |
| Ta_S26024056 | Delta tonoplast intrinsic protein tip2 2                            |
| Ta_S18009268 | Adenine phosphoribosyltransferase 1                                 |
| Ta_S13143579 | Nuclear transport factor 2                                          |
| contig_2218  | Vacuolar ATP synthase subunit f                                     |
| Ta_S58853618 | Natural resistance-associated macrophage protein                    |
| contig_3857  | D-xylose-proton symporter-like 2                                    |
| Ta_S26028058 | Vacuolar ATP synthase 16 kda proteolipid subunit                    |
| Ta_S17985842 | Auxin efflux carrier                                                |
| contig_401   | ABC transporter c family member 10-like                             |
| Ta_S17987421 | Oligomycin sensitivity conferring protein                           |
| contig_4282  | Transportin 1                                                       |
| Ta_S22391325 | Zinc transporter ztp29-like                                         |
| Ta_S52542585 | Hypothetical protein                                                |
| Ta_S58881750 | Sulfate transporter                                                 |
| Ta_S52542806 | Integral membrane transporter family protein                        |
| Ta_S52546225 | Nucleobase-ascorbate transporter 6-like                             |
| Ta_S58902258 | Tonoplast intrinsic protein                                         |
| contig_4601  | Vacuolar proton translocating ATPase 100 kda subunit-like isoform 1 |
| contig_2217  | Importin beta                                                       |
| contig_4470  | Autoinhibited calcium ATPase                                        |
| Ta_S52543198 | Zinc transporter                                                    |
| Ta_S58901635 | Plasma membrane intrinsic protein                                   |
| Ta_S52543438 | Protein transport protein sec23                                     |
| Ta_S13110544 | Vacuolar ATPase b subunit                                           |
| Ta_S58884802 | Pot family expressed                                                |

|              |                                                               |
|--------------|---------------------------------------------------------------|
| contig_4887  | ABC transporter g family member 28-like                       |
| Ta_S22384411 | Vacuolar ATPase b subunit                                     |
| Ta_S18012476 | Protein transport protein sec61 gamma subunit                 |
| Ta_S17989967 | Mitochondrial import inner membrane translocase subunit tim22 |
| contig_2375  | Glutamate synthase 1                                          |
| Ta_S52543355 | Copper-transporting ATPase ran1-like isoform 1                |
| Ta_S58882139 | ABC transporter b family member 20-like                       |
| Ta_S58852998 | Heat intolerant 1 protein                                     |
| Ta_S32607163 | Sec14p-like phosphatidylinositol transfer family protein      |
| Ta_S52545986 | Cation-transporting ATPase                                    |
| Ta_S58890717 | Peptide transporter ptr2-b                                    |
| Ta_S26027792 | Adp-ribosylation factor                                       |
| contig_4808  | ABC transporter c family member 8-like                        |
| Ta_S58885043 | Glutamate receptor -like                                      |
| Ta_S52545806 | Mitochondrial import receptor subunit tom40                   |
| contig_6122  | Acyl- oxidase acx3                                            |
| Ta_S52546995 | Beta-adaptin-like protein c                                   |
| Ta_S58861678 | Biopterin transport-related protein bt1                       |
| Ta_S58862614 | ABC transporter b family member mitochondrial-like            |
| Ta_S17865479 | ABC transporter c family member 3-like                        |
| contig_833   | ABC transporter b family member 19-like                       |
| Ta_S52545122 | Peroxisomal acyl- oxidase 1a                                  |
| Ta_S52543740 | ABC transporter family protein                                |
| Ta_S52544563 | Protein brittle- chloroplastic amyloplastic-like              |
| Ta_S52545421 | Mscs-like 2 protein                                           |
| Ta_S32511872 | Pattern formation protein emb30-like                          |
| contig_630   | Tonoplast intrinsic protein                                   |
| contig_5379  | Potassium transporter                                         |
| Ta_S52544118 | Synaptic vesicle 2-related protein                            |
| Ta_S58881991 | Snare-interacting protein keule                               |
| Ta_S58858964 | Mitochondrial substrate carrier family protein s-like         |
| Ta_S12923503 | ABC transporter b family member 11-like                       |
| Ta_S52542361 | Protein                                                       |

|              |                                                             |
|--------------|-------------------------------------------------------------|
| Ta_S52544008 | Ap-1 complex subunit gamma-1                                |
| Ta_S58899651 | Hexose transporter                                          |
| Ta_S13173768 | Mate efflux family protein alf5-like                        |
| Ta_S58865173 | Acyl- oxidase                                               |
| Ta_S17987294 | Ubiquinol-cytochrome c reductase iron-sulfur subunit        |
| Ta_S52542683 | Structural maintenance of chromosomes protein 4-like        |
| contig_5792  | Retrotransposon ty1-copia subclass                          |
| Ta_S18943256 | Ammonium transporter                                        |
| Ta_S16058064 | Protein transparent testa 12-like                           |
| Ta_S58904947 | Major facilitator superfamily expressed                     |
| contig_4204  | Cytosolic factor-like protein                               |
| Ta_S58869561 | ATP synthase beta chain                                     |
| Ta_S58903178 | Vacuolar proton-inorganic pyrophosphatase                   |
| Ta_S58888344 | Calcium-transporting ATPase endoplasmic reticulum-type-like |
| Ta_S58863243 | ABC transporter i family member chloroplastic-like          |
| Ta_S58851719 | Nuclear pore complex protein nup98-nup96                    |
| Ta_S52545549 | Calcium-transporting ATPase plasma membrane-type-like       |
| contig_4534  | Nucleolar GTP-binding protein 1-like                        |
| Ta_S52545751 | Phosphatidylinositol transfer-like protein ii               |
| Ta_S58851171 | Anion-transporting ATPase                                   |
| Ta_S52546492 | Target of myb protein 1                                     |
| Ta_S12923309 | Na <sup>+</sup> H <sup>+</sup> antiporter                   |
| Ta_S52541792 | Copper-transporting ATPase paa1                             |
| Ta_S13205053 | Vacuolar ATPase b subunit                                   |
| Ta_S58898758 | ABC transporter family protein                              |
| Ta_S58856407 | Potassium transporter 7-like                                |
| Ta_S25791176 | Na <sup>+</sup> H <sup>+</sup> antiporter                   |
| contig_1019  | Acyl-coenzyme a oxidase peroxisomal-like                    |
| Ta_S17987027 | Vacuolar protein sorting-associated protein 55 homolog      |
| Ta_S52546547 | laa-alanine resistance protein 1-like                       |
| Ta_S13043365 | ATP-binding cassette                                        |
| Ta_S50371846 | Pdr-type ABC transporter                                    |
| Ta_S58906099 | ABC transporter c family member 8-like                      |

|              |                                                                             |
|--------------|-----------------------------------------------------------------------------|
| Ta_S12923237 | Plasma membrane intrinsic protein                                           |
| Ta_S30404763 | Vacuolar ATP synthase subunit                                               |
| Ta_S52543415 | Metal transporter nramp3-like                                               |
| Ta_S26025374 | Ubiquinol-cytochrome c reductase complex ubiquinone-binding protein<br>qp-c |
| Ta_S58863315 | Bile acid transporter 5                                                     |
| contig_3077  | Cytochrome c biogenesis protein                                             |
| Ta_S37760734 | Mate efflux family protein                                                  |
| contig_3540  | Peptide transporter ptr2-like                                               |
| Ta_S52544430 | Synaptic vesicle 2-related                                                  |
| Ta_S17988029 | Multidrug resistance protein                                                |
| Ta_S58840767 | GTP-binding protein                                                         |
| contig_2049  | Heavy metal p-type ATPase                                                   |
| Ta_S52545109 | Beta-adaptin-like protein a                                                 |
| contig_5000  | Dmi1 protein                                                                |
| Ta_S52547002 | Translocation protein sec62                                                 |
| Ta_S16218736 | Adenosine 3 -phospho 5 -phosphosulfate transporter 1-like                   |
| Ta_S17989788 | ATP synthase delta                                                          |
| contig_5035  | Cytochrome c biogenesis c                                                   |
| Ta_S52546797 | Probable peptide nitrate transporter at1g59740-like                         |
| Ta_S17989748 | Calcium-binding mitochondrial carrier protein s -1-like                     |
| contig_3765  | Sucrose transporter                                                         |
| Ta_S52544666 | Upf0051 protein chloroplastic-like                                          |
| Ta_S58844672 | Metal transporter nramp6-like                                               |
| Ta_S52545945 | ATP synthase subunit                                                        |
| contig_3703  | Equilibrative nucleoside transporter 4-like                                 |
| Ta_S17977242 | ABC transporter i family member 17                                          |
| Ta_S58896318 | Potassium transporter                                                       |
| Ta_S58697407 | High-affinity potassium transporter                                         |
| Ta_S17880402 | Integral membrane protein                                                   |
| Ta_S58883545 | Structural maintenance of chromosomes 1                                     |
| Ta_S58901302 | Coiled-coil domain-containing protein 130-like                              |
| Ta_S58891137 | Sec14p-like phosphatidylinositol transfer family protein                    |

|              |                                                         |
|--------------|---------------------------------------------------------|
| contig_4657  | Plastidic glucose transporter 4-like                    |
| Ta_S58858093 | Protein                                                 |
| contig_4862  | Heavy metal ATPase                                      |
| Ta_S17898000 | Sugar transporter                                       |
| contig_3468  | Equilibrative nucleoside transporter                    |
| Ta_S58868762 | Chloride channel protein                                |
| Ta_S52543186 | Peptide transporter ptr2-like                           |
| Ta_S58904258 | ATPase subunit 6                                        |
| Ta_S52546866 | Inositol transporter 1                                  |
| contig_1462  | Pleckstrin homology domain family a                     |
| Ta_S58856205 | Protein transport protein sec24-like at4g32640-like     |
| Ta_S52546249 | Cationic amino acid transporter                         |
| Ta_S17977147 | Polyol transporter 5-like                               |
| contig_2329  | Vacuolar ATPase b subunit                               |
| Ta_S52546724 | Plastidic glucose transporter 4                         |
| contig_5176  | ATP synthase subunit mitochondrial-like                 |
| Ta_S58893716 | Sucrose transporter                                     |
| Ta_S32545039 | Ap3-complex subunit beta-a-like                         |
| Ta_S52544955 | Amino acid carrier                                      |
| Ta_S16833772 | Two-pore calcium channel                                |
| Ta_S58851875 | Glutamate receptor -like                                |
| Ta_S16057847 | Vacuolar protein sorting-associated protein 45 homolog  |
| Ta_S58902373 | ABC transporter c family member 2-like                  |
| Ta_S52545304 | Chloride channel                                        |
| contig_2710  | ABC transporter c family member 10-like isoform 2       |
| Ta_S58857789 | Transportin 1                                           |
| contig_2990  | Ap-2 complex subunit alpha-1                            |
| Ta_S52543655 | Nucleobase-ascorbate transporter 6-like                 |
| Ta_S52543960 | Phosphatidylinositol transfer                           |
| contig_1302  | V-type proton ATPase 116 kda subunit a isoform 1-like   |
| Ta_S17890892 | Ubiquinol-cytochrome c reductase complex 14 kda protein |
| Ta_S58897837 | Protein transport protein sec61 beta subunit            |
| Ta_S26027263 | Transmembrane expressed                                 |

|              |                                                                |
|--------------|----------------------------------------------------------------|
| Ta_S52546483 | K(+) efflux antiporter chloroplastic-like                      |
| Ta_S58891022 | ABC transporter a family member 7-like                         |
| contig_6673  | Cation h+ exchanger                                            |
| Ta_S17987255 | Delta tonoplast intrinsic protein tip2 2                       |
| Ta_S58860645 | Mitochondrial substrate carrier family protein                 |
| contig_6107  | Glutamate synthase 1                                           |
| Ta_S58897309 | ABC transporter d family member 1                              |
| contig_3811  | Endoplasmic reticulum-type calcium-transporting ATPase 4       |
| Ta_S58885850 | Oligopeptide transporter                                       |
| Ta_S17888779 | Chloride channel                                               |
| Ta_S17888502 | Protein                                                        |
| Ta_S52542520 | Sodium hydrogen exchanger 6-like                               |
| Ta_S58909002 | ABC transporter c family member 10-like isoform 1              |
| contig_1481  | Solute carrier family facilitated glucose transporter member 8 |
| Ta_S58897107 | Chloride channel                                               |
| Ta_S37805390 | Monosaccharide transporter 1                                   |
| Ta_S52542911 | Organic anion transporter                                      |
| Ta_S52546602 | Sugar transport protein 5                                      |
| contig_398   | ABC transporter b family member 19-like                        |
| Ta_S58869162 | ATPase subunit 6                                               |
| Ta_S26025803 | Adp-ribosylation factor                                        |
| contig_798   | Probable importin-7 homolog                                    |
| Ta_S12923233 | Potassium channel akt1-like                                    |
| Ta_S12899217 | Protein                                                        |
| Ta_S22366111 | Temperature-induced lipocalin                                  |
| contig_4118  | Gamma-adaptin 1                                                |
| contig_2489  | Plasma membrane h+-ATPase                                      |
| contig_1116  | Acyl- oxidase acx3                                             |
| Ta_S16227814 | Auxin efflux carrier                                           |
| Ta_S52542190 | Anion-transporting ATPase family protein                       |
| Ta_S58904990 | Calcium-transporting ATPase plasma membrane-type-like          |
| Ta_S17984911 | Mate efflux family protein 5-like                              |
| Ta_S16058136 | Mitochondrial uncoupling protein 3                             |



|              |                                                                                             |
|--------------|---------------------------------------------------------------------------------------------|
| Ta_S22390741 | Leucine zipper protein zip1                                                                 |
| Ta_S58902653 | V-type h <sup>+</sup> -transporting ATPase subunit i                                        |
| Ta_S58882281 | Ap-2 complex subunit alpha-1                                                                |
| contig_7143  | Atvps11 protein                                                                             |
| Ta_S58732267 | Cadmium zinc-transporting ATPase 3-like                                                     |
| contig_4286  | Shaker-like potassium channel                                                               |
| Ta_S22388588 | Zinc transporter ztp29-like                                                                 |
| Ta_S52541089 | Cytochrome c oxidase assembly protein cox15-like                                            |
| contig_4848  | Cytochrome c biogenesis b                                                                   |
| Ta_S26022608 | Mitochondrial import inner membrane translocase subunit tim17 tim22<br>tim23 family protein |
| contig_2801  | Mdr-like ABC transporter                                                                    |
| Ta_S52544739 | ABC transporter family protein                                                              |
| Ta_S17894256 | Vacuolar ATP synthase subunit g                                                             |
| contig_162   | P-type ATPase                                                                               |
| contig_1259  | Triose phosphate phosphate non-green precursor                                              |
| contig_5776  | Calcium-transporting ATPase endoplasmic reticulum-type-like                                 |
| contig_430   | Golgin candidate 6-like                                                                     |
| Ta_S58882086 | Hexose transporter                                                                          |
| Ta_S52546010 | Aminophospholipid ATPase                                                                    |
| Ta_S58903294 | Ap-1 complex subunit gamma-2-like                                                           |
| contig_766   | Protein transparent testa 12-like                                                           |
| Ta_S18011873 | ATP synthase epsilon mitochondrial                                                          |
| Ta_S58869914 | Glucose-6-phosphate translocator                                                            |
| contig_2699  | Potassium efflux antiporter                                                                 |
| Ta_S58862613 | ABC transporter b family member mitochondrial-like                                          |
| Ta_S58839689 | Cellular apoptosis susceptibility protein                                                   |
| Ta_S58896020 | Voltage-dependent anion channel                                                             |
| contig_5229  | Tumor suppressor                                                                            |
| Ta_S58863290 | Probable udp-sugar transporter protein slc35a4-like                                         |
| Ta_S52546529 | ABC transporter retinal flippase subfamily                                                  |
| Ta_S26021526 | Probable anion transporter chloroplastic-like                                               |
| Ta_S58865002 | Plastidic ATP adp transporter                                                               |

|              |                                                             |
|--------------|-------------------------------------------------------------|
| Ta_S13170574 | Retrotransposon ty1-copia subclass                          |
| Ta_S12984597 | Calcium-binding mitochondrial carrier protein s -1-like     |
| Ta_S52545757 | Sc3 protein                                                 |
| Ta_S58864112 | Peptide transporter ptr2-like                               |
| contig_4609  | Phospholipid-transporting ATPase 9-like                     |
| Ta_S26020190 | Hydrogen-transporting ATP rotational mechanism              |
| Ta_S52544750 | Plastidic phosphate translocator-like protein1              |
| contig_3295  | ABC transporter b family member 20-like                     |
| contig_60    | Plasma membrane h+-ATPase                                   |
| Ta_S43287760 | V-type proton ATPase subunit c-like                         |
| Ta_S52543089 | Vacuolar-sorting receptor 7-like                            |
| contig_2961  | Aquaporin pip                                               |
| Ta_S52543870 | Potassium channel beta subunit                              |
| contig_1934  | Probable cyclic nucleotide-gated ion channel 17-like        |
| Ta_S58896581 | Zip-like zinc transporter                                   |
| Ta_S22373784 | Bet1 sft1-related snare                                     |
| Ta_S52544660 | Xanthine uracil permease family expressed                   |
| Ta_S17878602 | Mac perforin domain-containing protein                      |
| Ta_S37750060 | Mitochondrial folate transporter carrier-like               |
| contig_4044  | Glutamate synthase 1                                        |
| Ta_S58841527 | Protein                                                     |
| contig_2128  | Chloride channel                                            |
| Ta_S52543845 | Monosaccharide-sensing protein 2-like                       |
| Ta_S26022634 | Acyl carrier protein 3                                      |
| Ta_S58882045 | Peptide transport protein                                   |
| Ta_S26027002 | Vacuolar ATP synthase 16 kda proteolipid subunit            |
| Ta_S58839498 | Ran-binding protein                                         |
| Ta_S22383279 | Copper-transporting ATPase ran1-like isoform 1              |
| Ta_S58883241 | Mitochondrial rieske iron-sulfur protein                    |
| Ta_S58892345 | Polyol transporter 5-like                                   |
| Ta_S58902233 | Calcium-transporting ATPase endoplasmic reticulum-type-like |
| Ta_S17989856 | Protein transport protein sec61 gamma subunit               |
| Ta_S16202616 | Nitrate transporter                                         |

|              |                                                               |
|--------------|---------------------------------------------------------------|
| Ta_S16203140 | Oligopeptide transporter opt family                           |
| Ta_S52544226 | Zip transporter                                               |
| Ta_S13168998 | Peptide transporter ptr2-like                                 |
| Ta_S22382874 | Hexose transporter                                            |
| Ta_S52541889 | Aquaporin sip1-2                                              |
| Ta_S58856386 | Calcium-binding mitochondrial carrier protein s -1-like       |
| contig_4383  | Citrate efflux mate transporter                               |
| Ta_S17889512 | Mate efflux                                                   |
| Ta_S58848084 | ATP synthase cf1 alpha subunit                                |
| Ta_S13044461 | Proton-dependent oligopeptide transport family protein        |
| Ta_S58850911 | Copper-exporting ATPase                                       |
| Ta_S32629087 | Pot family expressed                                          |
| Ta_S17984695 | Major facilitator superfamily expressed                       |
| Ta_S26022980 | Probable aquaporin pip2-7-like                                |
| Ta_S58868686 | Mitochondrial import receptor subunit tom40                   |
| Ta_S58889000 | Protein                                                       |
| Ta_S22380521 | Mitochondrial import inner membrane translocase subunit tim13 |
| Ta_S13265990 | Probable cadmium zinc-transporting ATPase chloroplastic-like  |
| Ta_S58854293 | Metal tolerance protein                                       |
| Ta_S52542816 | Zinc transporter zip1                                         |
| Ta_S58860533 | Coiled-coil domain-containing protein 130-like                |
| Ta_S19225562 | Potassium transporter                                         |
| Ta_S16233185 | Magnesium transporter mrs2-1                                  |
| Ta_S58889179 | Protein translocase protein transporter                       |
| Ta_S50379788 | Adenine guanine permease azg1-like                            |
| Ta_S32585319 | Potassium transporter                                         |
| contig_1626  | Sec14 cytosolic factor-like                                   |
| contig_2673  | Peroxin pex14                                                 |
| contig_6271  | Multidrug resistance p-glycoprotein                           |
| contig_335   | Probable importin subunit beta-4-like                         |
| contig_2433  | Phospholipid-translocating ATPase                             |
| contig_285   | Mitochondrial inner membrane translocating protein            |
| Ta_S52544458 | Coiled-coil domain-containing protein 130-like                |

|              |                                                             |
|--------------|-------------------------------------------------------------|
| Ta_S58852687 | Permease 1                                                  |
| Ta_S22391437 | ABC transporter f family member 1-like                      |
| Ta_S58866999 | Preprotein translocase subunit secy-like                    |
| contig_591   | Mdr-like ABC transporter                                    |
| Ta_S18011530 | Protein                                                     |
| Ta_S58900128 | Transparent testa 12 protein                                |
| Ta_S58887521 | ABC transporter c family member 8-like                      |
| Ta_S16190121 | Copper transporter                                          |
| Ta_S58864584 | Callose synthase 5-like                                     |
| Ta_S58856694 | Copper-transporting ATPase ran1-like                        |
| contig_2550  | ABC transporter b family member                             |
| Ta_S37808596 | Mitochondrial substrate carrier family protein              |
| Ta_S58838859 | Aquaporin sip1-2                                            |
| Ta_S52542158 | Chloride channel protein clc-d                              |
| Ta_S52544186 | Copper ion transmembrane transporter                        |
| Ta_S12951319 | Mitochondrial import receptor subunit tom7-1                |
| Ta_S52542652 | Transporter arsb-like                                       |
| Ta_S22367110 | Pattern formation protein emb30                             |
| Ta_S26020095 | V-type proton ATPase subunit brain isoform                  |
| Ta_S58869496 | Nucleobase ascorbate transporter                            |
| contig_1156  | Nucleotide-sugar transporter sugar porter                   |
| Ta_S58905116 | Cytochrome b6-f complex iron-sulfur subunit                 |
| contig_2439  | Coatomer alpha subunit-like protein                         |
| contig_6520  | Structural maintenance of chromosomes protein 4-like        |
| contig_6113  | Protein hasty 1-like                                        |
| contig_4707  | Protein                                                     |
| contig_2141  | Metal-nicotianamine transporter ysl3                        |
| contig_2658  | Heavy metal p-type ATPase                                   |
| Ta_S22383321 | Nitrate transporter                                         |
| Ta_S16058118 | Sucrose transporter                                         |
| Ta_S58847746 | Vacuolar protein sorting-associated protein 33-like protein |
| Ta_S58889854 | Aquaporin sip2-1                                            |
| Ta_S32665593 | Solute carrier family 40 member 1-like                      |

|              |                                                               |
|--------------|---------------------------------------------------------------|
| Ta_S18011994 | ATP synthase epsilon mitochondrial                            |
| Ta_S22381887 | Protein                                                       |
| Ta_S52545939 | Polyol transporter 5-like                                     |
| Ta_S32539927 | ABC transporter f family member 4-like                        |
| Ta_S58854433 | Ccr4-not transcription complex subunit 1-like                 |
| contig_2531  | Potassium transporter                                         |
| Ta_S18007048 | Nuclear transport factor 2                                    |
| Ta_S18012189 | Tom7-like protein                                             |
| Ta_S52542561 | Protein                                                       |
| Ta_S37751594 | Pinus taeda anonymous locus 2_2352_02 genomic sequence        |
| Ta_S32666729 | Inward rectifying shaker k+ channel                           |
| contig_705   | Nucleolar GTP-binding protein 1-like                          |
| Ta_S58851961 | Amino acid permease 6                                         |
| Ta_S58891533 | Adp-ribosylation factor                                       |
| contig_1430  | Mitochondrial import inner membrane translocase subunit tim44 |
| contig_5349  | High-affinity potassium transporter                           |
| Ta_S58863258 | Protein hasty 1-like                                          |
| Ta_S52896028 | Protein transport protein sec61 beta subunit                  |
| Ta_S58849771 | Pdr-like ABC transporter                                      |
| Ta_S12933474 | Plasma membrane intrinsic protein                             |
| Ta_S17888215 | Adenine guanine permease azg2-like                            |
| contig_5278  | Structural maintenance of chromosomes protein 4               |
| contig_1101  | Sugar transporter erd6-like 5-like                            |
| Ta_S17987672 | Sec-independent protein translocase                           |
| Ta_S52544662 | Boron transporter                                             |
| Ta_S22379520 | Probable inositol transporter 2-like                          |
| contig_1289  | Pot family expressed                                          |
| Ta_S13114578 | Cation-transporting ATPase                                    |
| Ta_S32509085 | ABC transporter family of the mitochondria family             |
| contig_2726  | Importin subunit beta-1-like                                  |
| contig_4667  | Protein                                                       |
| contig_1237  | Transportin 1                                                 |
| Ta_S16058141 | Polyol transporter 5-like                                     |

|              |                                                                   |
|--------------|-------------------------------------------------------------------|
| contig_2553  | Acyl- oxidase acx3                                                |
| Ta_S16058178 | Polyol transporter 5-like                                         |
| Ta_S12864316 | Plasma membrane h+ ATPase                                         |
| Ta_S46892927 | Sucrose transporter 2                                             |
| Ta_S58903293 | Ap-1 complex subunit gamma-1                                      |
| Ta_S52543990 | Flagellar biosynthesis protein expressed                          |
| Ta_S58896990 | Sorbitol transporter                                              |
| Ta_S58863330 | Thiamin pyrophosphokinase 1                                       |
| Ta_S52544273 | Ca2+ antiporter cation exchanger                                  |
| contig_4514  | Vacuolar protein sorting-associated protein 11 homolog            |
| contig_3747  | ABC transporter b family member 11-like                           |
| contig_3261  | Probable potassium transporter 11-like                            |
| Ta_S58861391 | Dna replication licensing factor mcm5-a-like                      |
| Ta_S16058468 | Aux1-like permease                                                |
| Ta_S52544633 | P-type ATPase                                                     |
| Ta_S52546908 | Sugar transport protein 14                                        |
| contig_3672  | Protein hasty 1-like                                              |
| Ta_S13109564 | Amino acid permease family expressed                              |
| Ta_S52545921 | Preprotein translocase subunit chloroplastic-like                 |
| contig_6236  | Cation-transporting ATPase                                        |
| Ta_S13145956 | Nod26-like major intrinsic protein                                |
| Ta_S52545162 | Nitrite transporter                                               |
| Ta_S58903343 | Bile acid na+ symporter family protein                            |
| Ta_S16200898 | ABC transporter g family member 14-like                           |
| Ta_S58883086 | Mitochondrial import inner membrane translocase subunit tim9      |
| Ta_S17987465 | Nascent polypeptide-associated complex alpha subunit-like protein |
| contig_3286  | Calcium-transporting ATPase plasma membrane-type-like             |
| Ta_S18012117 | Protein transport protein sec61 gamma subunit                     |
| contig_5378  | Solute carrier family facilitated glucose transporter member 8    |
| contig_233   | Phospholipid-transporting ATPase 9-like                           |
| contig_1003  | Pleiotropic drug resistance protein 4-like                        |
| Ta_S13172107 | Cellular retinaldehyde-binding triple function                    |
| Ta_S58859664 | Heat repeat family expressed                                      |

|              |                                                         |
|--------------|---------------------------------------------------------|
| contig_2379  | Ap-2 complex subunit alpha-1                            |
| Ta_S52544554 | Glutamate receptor -like                                |
| Ta_S52895793 | ATP synthase cf0 subunit iv                             |
| Ta_S52542624 | Dna repair protein reca homolog mitochondrial-like      |
| Ta_S32625916 | Transmembrane expressed                                 |
| contig_4255  | Copper-transporting ATPase 3-like                       |
| contig_5545  | Mdr-like ABC transporter                                |
| Ta_S58882933 | Protein                                                 |
| Ta_S58857435 | High-affinity potassium transporter                     |
| contig_3093  | Acyl carrier protein                                    |
| Ta_S58898829 | ABC transporter c family member 10-like isoform 1       |
| Ta_S52546459 | Sec14 cytosolic factor family protein                   |
| Ta_S32668167 | Protein translocase protein transporter                 |
| Ta_S52543585 | Grave disease carrier                                   |
| Ta_S58850908 | Proline transporter                                     |
| Ta_S18008684 | Cytochrome c oxidase polypeptide vib                    |
| Ta_S12942846 | Autoinhibited ca <sup>2+</sup> -ATPase 1                |
| Ta_S58857313 | Adp-ribosylation factor                                 |
| Ta_S58896787 | Delta tonoplast intrinsic protein tip2 2                |
| Ta_S58869086 | V-type h <sup>+</sup> -transporting ATPase subunit i    |
| Ta_S52546402 | Peptide transporter ptr2-like                           |
| contig_2434  | Golgin candidate 6-like                                 |
| Ta_S58907002 | Lysine histidine transporter 1                          |
| contig_5893  | Heat intolerant 1 protein                               |
| Ta_S32634861 | Phospholipid-transporting ATPase 3-like                 |
| contig_3566  | Phospholipid-transporting ATPase 9-like                 |
| Ta_S52544014 | Glucose-6-phosphate translocator                        |
| Ta_S26025085 | Vacuolar iron transporter                               |
| Ta_S13147310 | Ubiquinol-cytochrome c reductase complex 14 kda protein |
| Ta_S52545145 | Phosphate transporter 4                                 |
| Ta_S24513010 | Chloride channel protein clc-a                          |
| contig_3982  | Multidrug resistance protein ABC transporter family     |
| contig_7080  | GTP-binding protein sar1a                               |

|              |                                                              |
|--------------|--------------------------------------------------------------|
| Ta_S13025897 | Permease 1                                                   |
| contig_3919  | ATP synthase cf1 epsilon subunit                             |
| Ta_S58868698 | Transmembrane emp24 domain-containing protein                |
| Ta_S52541759 | Ammonium transporter                                         |
| contig_3616  | Vacuolar proton                                              |
| Ta_S13056037 | Protein                                                      |
| Ta_S18660952 | Almt1                                                        |
| Ta_S22381712 | Protein                                                      |
| Ta_S58896944 | Plastidic ATP adp transporter                                |
| contig_6789  | Importin beta-like protein                                   |
| contig_4952  | Autoinhibited ca <sup>2+</sup> -ATPase 1                     |
| Ta_S58869566 | ATP synthase beta subunit                                    |
| Ta_S58842080 | Probable envelope carrier chloroplastic-like                 |
| Ta_S58896554 | Syntaxin 72                                                  |
| Ta_S58890400 | ABC transporter d family member 1                            |
| contig_6277  | Vacuolar-type h <sup>+</sup> -ATPase subunit b3 (vha-b3)     |
| Ta_S37806351 | Ap-1 complex subunit gamma-2                                 |
| Ta_S32507255 | Btb poz domain-containing protein at5g41330-like             |
| Ta_S58849599 | Protein paused                                               |
| Ta_S12965097 | P-glycoprotein 1                                             |
| Ta_S52545074 | Magnesium transporter                                        |
| Ta_S37853592 | Metal-nicotianamine transporter ysl3                         |
| contig_6490  | ABC transporter b family member 4-like                       |
| Ta_S58904749 | Peptide transporter ptr2-like                                |
| contig_4503  | ABC transporter family pleiotropic drug resistance protein   |
| Ta_S17985860 | Mitochondrial import inner membrane translocase subunit tim8 |
| Ta_S13117656 | Potassium transporter                                        |
| contig_6407  | Mdr-like ABC transporter                                     |
| contig_3166  | Nitrate                                                      |
| Ta_S22380881 | Cation efflux protein zinc                                   |
| Ta_S52544260 | ABC transporter g family member 7                            |
| Ta_S58859924 | Plastidic glucose transporter 4-like                         |
| Ta_S16058325 | Anion-transporting ATPase                                    |



|              |                                                                    |
|--------------|--------------------------------------------------------------------|
| Ta_S58862472 | Sam domain family protein                                          |
| Ta_S58902260 | Tonoplast intrinsic protein                                        |
| Ta_S39723861 | Aquaporin                                                          |
| Ta_S58849529 | Nucleotide-sensitive chloride conductance regulator family protein |
| Ta_S58902024 | Inositol-3-phosphate synthase                                      |
| Ta_S58856713 | Ap-4 complex subunit sigma-1                                       |
| Ta_S58906314 | Plasma membrane h <sup>+</sup> -ATPase                             |
| Ta_S52544997 | Random slug protein 5-like                                         |
| Ta_S52898599 | Sulfate transporter                                                |
| Ta_S58867285 | ABC transporter c family member 10-like isoform 2                  |
| contig_724   | Phospholipid-transporting ATPase 9-like                            |
| Ta_S52544397 | Rna splicing protein                                               |
| contig_2869  | ABC transporter b family member 11-like                            |
| Ta_S52546291 | Potassium transporter                                              |
| Ta_S58860907 | P-type ATPase                                                      |
| Ta_S58897494 | Protein translocase subunit chloroplastic-like                     |
| contig_1459  | Acyl- oxidase acx3                                                 |
| Ta_S52544718 | Nuclear division rft1-like protein                                 |
| Ta_S17975072 | ABC transporter g family member 14-like                            |
| Ta_S16266289 | Phosphoenolpyruvate phosphate translocator chloroplastic-like      |
| contig_2995  | H <sup>+</sup> -translocating pyrophosphatase                      |
| Ta_S52545029 | Protein                                                            |
| Ta_S41574387 | Vacuolar H <sup>+</sup> -translocating inorganic pyrophosphatase   |
| Ta_S52544630 | Importin 9                                                         |
| contig_3006  | Protein                                                            |
| Ta_S58903049 | Sulfate transporter                                                |
| contig_382   | Oligopeptide transporter                                           |
| contig_1230  | Calcium-transporting ATPase endoplasmic reticulum-type-like        |
| Ta_S52542984 | Amino acid permease                                                |
| Ta_S12923238 | Plasma membrane intrinsic protein                                  |
| contig_1770  | ABC transporter b family member 19-like                            |
| Ta_S37854042 | Mate efflux family protein 5-like                                  |
| Ta_S16195397 | GTPase sar1                                                        |

|              |                                                        |
|--------------|--------------------------------------------------------|
| Ta_S13112575 | Vacuolar ATPase subunit h protein                      |
| Ta_S52544949 | Autoinhibited calcium ATPase                           |
| Ta_S12923032 | Voltage-dependent anion channel                        |
| contig_2043  | ABC transporter c family member 3-like                 |
| Ta_S17888266 | Metal tolerance protein c1                             |
| contig_3728  | Coatomer alpha                                         |
| Ta_S58857130 | Cation proton exchanger 1a                             |
| Ta_S37910108 | Potassium efflux antiporter                            |
| Ta_S52546622 | Potassium channel akt2 3-like                          |
| Ta_S18012568 | Vacuolar ATP synthase 16 kda proteolipid subunit       |
| Ta_S12964828 | Multidrug resistance protein ABC transporter family    |
| Ta_S26027375 | GTP-binding protein sar1a                              |
| contig_4875  | Protein transport protein sec23-like                   |
| Ta_S12923239 | Pip1 protein                                           |
| contig_99    | Proton-dependent oligopeptide transport family protein |
| Ta_S58859226 | Sugar transporter erd6-like 4-like isoform 1           |
| Ta_S52544989 | Plastidic general dicarboxylate transporter            |
| Ta_S37754604 | Protein                                                |
| Ta_S52545455 | Importin subunit alpha-1-like                          |
| Ta_S12933475 | Pip1 protein                                           |
| Ta_S58859199 | Syntaxin 72                                            |
| contig_3828  | Copper-transporting ATPase ran1-like isoform 2         |
| contig_251   | Multidrug pheromone mdr ABC transporter family         |
| contig_3365  | Copper-transporting ATPase ran1-like isoform 2         |
| Ta_S22377943 | Protein                                                |
| contig_2238  | Pip1 protein                                           |
| Ta_S58869427 | ATP synthase cf1 alpha subunit                         |
| Ta_S52542701 | Peptide transporter ptr2-like                          |
| Ta_S32562893 | Potassium transporter 25-like                          |
| contig_4272  | Probable importin-7 homolog                            |
| Ta_S52545624 | ATP synthase subunit mitochondrial-like                |
| contig_6836  | Transparent testa 12 protein                           |
| Ta_S16058200 | Peptide transporter ptr3-a-like                        |

|              |                                                        |
|--------------|--------------------------------------------------------|
| Ta_S58854345 | ABC transporter b family member chloroplastic-like     |
| contig_1728  | Heavy metal ATPase                                     |
| Ta_S17984942 | Peptide transport protein                              |
| Ta_S52543709 | Inner membrane protein albino3                         |
| contig_7051  | Pip1 protein                                           |
| Ta_S52546690 | Phospholipid-translocating ATPase                      |
| Ta_S52545871 | Mitochondrial uncoupling protein                       |
| Ta_S52543195 | Ca <sup>2+</sup> antiporter cation exchanger           |
| Ta_S26026283 | Acyl carrier protein                                   |
| contig_5797  | Exportin-1-like isoform 1                              |
| Ta_S13116503 | Probable importin-7 homolog                            |
| Ta_S52544753 | Cellular retinaldehyde-binding triple function         |
| Ta_S37913018 | Mate efflux                                            |
| Ta_S16057997 | Importin subunit alpha-1-like                          |
| contig_636   | Ap-2 complex subunit alpha-1                           |
| Ta_S26027653 | Cyclic nucleotide-gated calmodulin-binding ion channel |
| Ta_S26026318 | Plasma membrane intrinsic protein                      |
| contig_370   | Vacuolar cation proton exchanger 5                     |
| Ta_S17988965 | Ubiquinol-cytochrome c reductase iron-sulfur subunit   |
| Ta_S12970099 | ABC transporter i family member chloroplastic-like     |
| Ta_S58862485 | Chloride channel                                       |
| Ta_S37854430 | Cytochrome c subunit vib family protein                |
| Ta_S58901634 | Plasma membrane intrinsic protein                      |
| Ta_S58887777 | Ethylene-insensitive protein 2-like                    |
| Ta_S17985869 | Uncoupling protein                                     |
| Ta_S37851284 | ABC transporter b family member                        |
| Ta_S58869512 | ABC transporter c family member 5-like                 |
| contig_2482  | Phospholipid-transporting ATPase 9-like                |
| Ta_S13137501 | V-type proton ATPase subunit b2                        |
| Ta_S37829864 | Polyol transporter 5-like                              |
| Ta_S52541369 | Like phosphatidylinositol transfer protein             |
| Ta_S58892190 | Zinc transporter at3g08650-like                        |
| contig_3844  | Myosin 1                                               |

|              |                                                             |
|--------------|-------------------------------------------------------------|
| contig_1968  | ABC transporter b family member 20-like                     |
| Ta_S52543321 | Coatomer subunit epsilon                                    |
| Ta_S13031943 | Autophagy protein 5                                         |
| Ta_S52543837 | Importin subunit beta-1-like                                |
| Ta_S17989470 | Beta-mannosidase                                            |
| Ta_S58892663 | ATP-binding cassette                                        |
| contig_3983  | Equilibrative nucleoside transporter                        |
| Ta_S58888513 | Proline transporter                                         |
| contig_3051  | Armadillo beta-catenin-like repeat-containing protein       |
| Ta_S58866770 | Condensin complex components subunit                        |
| Ta_S52544658 | Protein transparent testa 12-like                           |
| contig_253   | D-xylose-proton symporter-like 2                            |
| Ta_S37894959 | Glutamate-gated kainate-type ion channel receptor subunit 5 |
| Ta_S52542563 | Nuclear pore complex protein nup155                         |
| Ta_S41658097 | Zinc transporter                                            |
| contig_1517  | Copper-transporting ATPase 3-like                           |
| Ta_S13272681 | Carrier protein                                             |
| Ta_S58884943 | Importin subunit beta-1-like                                |
| Ta_S58899261 | Zinc transporter                                            |
| contig_4465  | Equilibrative nucleoside transporter 3-like                 |
| Ta_S12940628 | ABC transporter b family member 11-like                     |
| Ta_S17986985 | Nitrate                                                     |
| Ta_S58869510 | ABC transporter c family member 5-like                      |
| Ta_S58883250 | ABC transporter b family member mitochondrial-like          |
| contig_5031  | Pleiotropic drug resistance protein                         |
| Ta_S22366915 | Chloride channel                                            |
| Ta_S58907103 | Calcium-transporting ATPase endoplasmic reticulum-type-like |
| contig_1511  | ABC transporter c family protein                            |
| Ta_S22374020 | Peptide transporter ptr2-like                               |
| Ta_S58843367 | Novel plant snare 11                                        |
| Ta_S58904602 | Outward-rectifying potassium channel                        |
| Ta_S52543376 | Protein transparent testa 12-like                           |
| contig_3052  | Sec14 cytosolic factor                                      |

|              |                                                              |
|--------------|--------------------------------------------------------------|
| Ta_S17974709 | ABC transporter b family member 4-like                       |
| Ta_S26025103 | Mitochondrial import inner membrane translocase subunit tim9 |
| Ta_S37769891 | Organic cation transporter                                   |
| Ta_S16058248 | Sec14 cytosolic factor-like                                  |
| Ta_S52544511 | Mitochondrial carnitine acylcarnitine carrier-like protein   |
| Ta_S32128181 | Vacuolar proton-ATPase                                       |
| Ta_S58862070 | Metal tolerance protein                                      |
| Ta_S52543394 | Potassium transporter 25-like                                |
| contig_5578  | Probable importin-7 homolog                                  |
| Ta_S37761576 | Peptide transporter ptr2                                     |
| Ta_S52542399 | Magnesium transporter -like family protein                   |
| Ta_S58847882 | Phospholipid-translocating p-type flippase family expressed  |
| Ta_S52545672 | ABC transporter b family member 19-like                      |
| contig_2825  | Ubiquinol-cytochrome c reductase iron-sulfur subunit         |
| Ta_S58897290 | Nucleolar GTP-binding protein 1-like                         |
| contig_737   | Plasma membrane h <sup>+</sup> -ATPase                       |
| contig_45    | Nuclear transport factor 2                                   |
| Ta_S58869810 | Hippocampus abundant transcript-like protein                 |
| contig_3188  | ATP synthase subunit mitochondrial-like                      |
| Ta_S58901087 | GTP-binding protein                                          |
| Ta_S18957412 | Auxin efflux carrier                                         |
| contig_5784  | ABC transporter c family member 9-like                       |
| contig_5043  | Peptide transporter ptr2-like                                |
| contig_4214  | Multidrug resistance protein                                 |
| Ta_S58891743 | Protein transport protein sec24-like at4g32640-like          |
| contig_6057  | Protein                                                      |
| Ta_S58890043 | Aluminum activated citrate transporter                       |
| Ta_S52541389 | Peptide transporter ptr2-b                                   |
| Ta_S58868892 | Adenosine 3 -phospho 5 -phosphosulfate transporter 1-like    |
| contig_232   | Outer plastidial membrane protein porin                      |
| Ta_S52544227 | ABC transporter c family member 4-like                       |
| Ta_S52542942 | Protein trigalactosyldiacylglycerol chloroplastic-like       |
| Ta_S58886286 | Phospholipid-transporting ATPase 1-like                      |

|              |                                                                                             |
|--------------|---------------------------------------------------------------------------------------------|
| Ta_S58905498 | Iron-sulfur cluster assembly protein                                                        |
| Ta_S58864224 | Pip1 protein                                                                                |
| Ta_S58890041 | Hypothetical protein MTR_1g006180 [Medicago truncatula]                                     |
| contig_5187  | Vacuolar ATPase subunit h protein                                                           |
| Ta_S52545715 | Glycerol 3-phosphate permease                                                               |
| contig_1491  | Protein kinase and pp2c-like domain-containing protein                                      |
| Ta_S58897399 | Probable metal-nicotianamine transporter ysl6-like isoform 1                                |
| contig_2916  | Golgin candidate 6-like                                                                     |
| Ta_S58884782 | Protein                                                                                     |
| Ta_S52542814 | Glutamate receptor -like                                                                    |
| Ta_S58895728 | ABC transporter family protein                                                              |
| Ta_S12976373 | ABC transporter b family member 11-like                                                     |
| Ta_S58897923 | ABC transporter f family member 1-like                                                      |
| contig_5937  | Vacuolar-type h <sup>+</sup> -ATPase subunit b3 (vha-b3)                                    |
| Ta_S52546366 | Translocase of chloroplast 34                                                               |
| contig_6655  | P-type ATPase                                                                               |
| Ta_S22378152 | Hydrogen-transporting ATP rotational mechanism                                              |
| contig_685   | Exportin 1a                                                                                 |
| Ta_S24513076 | ABC transporter g family member 14-like                                                     |
| Ta_S52895572 | ATP synthase cf0 subunit i                                                                  |
| Ta_S58866912 | Endoplasmic reticulum                                                                       |
| Ta_S58903613 | Major facilitator superfamily expressed                                                     |
| Ta_S52547083 | Pdr-like ABC transporter                                                                    |
| contig_1501  | Plasma membrane ca <sup>2+</sup> -ATPase                                                    |
| Ta_S52546283 | Magnesium-protoporphyrin ix monomethyl ester                                                |
| Ta_S41658095 | Cadmium zinc-transporting ATPase 3-like                                                     |
| Ta_S52541526 | Mitochondrial import inner membrane translocase subunit tim17 tim22<br>tim23 family protein |
| contig_683   | Multidrug resistance                                                                        |
| Ta_S52543631 | Plasma membrane h <sup>+</sup> -ATPase                                                      |
| Ta_S52545320 | Vacuolar ATP synthase 21 kda proteolipid subunit                                            |
| contig_2459  | Autoinhibited calcium ATPase                                                                |
| Ta_S58863788 | Cral trio domain containing protein                                                         |

|              |                                                          |
|--------------|----------------------------------------------------------|
| Ta_S58866214 | V-type proton ATPase subunit b2                          |
| Ta_S52543292 | Amino acid permease 6                                    |
| Ta_S58843622 | Kda vesicle transport                                    |
| Ta_S17889694 | Organic anion transporter                                |
| Ta_S52542745 | Pattern formation protein emb30                          |
| Ta_S12923308 | Na <sup>+</sup> H <sup>+</sup> antiporter                |
| Ta_S12888527 | Plastidic ATP adp transporter                            |
| contig_6754  | ABC transporter c family member 5-like                   |
| Ta_S52541537 | Aux1-like permease                                       |
| contig_5637  | Like phosphatidylinositol transfer protein               |
| Ta_S16058102 | Sulfate transporter                                      |
| contig_1908  | Vacuolar protein sorting-associated protein 11 homolog   |
| Ta_S37826729 | Nitrate transporter -like                                |
| contig_1656  | Peptide transporter 1                                    |
| Ta_S52546340 | Transparent testa 12 protein                             |
| Ta_S58865139 | Phospholipid-translocating ATPase                        |
| Ta_S52546801 | Ripening regulated protein                               |
| Ta_S37807331 | Amino acid transporter                                   |
| Ta_S22369143 | Sugar carrier protein c-like                             |
| Ta_S16058101 | Zinc transporter                                         |
| Ta_S17978646 | Coatmer subunit alpha-3-like                             |
| contig_2095  | ABC glycine betaine l-proline ATPase subunit             |
| contig_3366  | Probable importin-7 homolog                              |
| Ta_S52545804 | Na <sup>+</sup> dependent neutral amino acid transporter |
| contig_2224  | Phospholipid-transporting ATPase 9-like                  |
| contig_1480  | Ap-1 complex subunit gamma-2                             |
| Ta_S58863882 | Coatmer epsilon subunit                                  |
| Ta_S24623194 | Amino acid selective channel protein                     |
| contig_1282  | Acyl carrier protein 5                                   |
| contig_5135  | Cytochrome c biogenesis c                                |
| Ta_S58897618 | Auxin efflux carrier-like protein                        |
| contig_2132  | Phospholipid-translocating ATPase                        |
| Ta_S52543238 | Cyclic nucleotide gated channel                          |

|              |                                                 |
|--------------|-------------------------------------------------|
| Ta_S52543425 | Potassium transporter 8-like                    |
| Ta_S26027017 | UDP-galactose transporter 1-like                |
| contig_6614  | Multidrug pheromone mdr ABC transporter family  |
| Ta_S17878740 | Nuclear transport factor 2                      |
| contig_4326  | Proline transporter                             |
| Ta_S52543536 | Kda vesicle transport                           |
| Ta_S22378216 | Vacuolar H <sup>+</sup> -pyrophosphatase        |
| Ta_S58883600 | Solute carrier family 22 member 15-like protein |
| Ta_S52544433 | Mitochondrial carrier protein                   |
| Ta_S17987355 | ADP-ribosylation factor                         |
| Ta_S22370682 | Copper-transporting ATPase 3-like               |
| Ta_S52543684 | Cation calcium exchanger 4                      |
| Ta_S52542608 | Sucrose transporter                             |

<sup>a</sup> Fold-change in red indicates lower level of expression in colonized wheat roots (CWR); (+)ND not expressed in the N-IWR libraries; Up-regulated, Down-regulated and Expressed ESTs are shading in red, blue and yellow respectively.
