# Supplementary material for: Dual RNA-seq transcriptional analysis of wheat roots colonized by Azospirillum brasilense reveals up-regulation of nutrient acquisition and cell cycle genes
Source: PubMed Central journal article supplement (PMC4042000; doi:10.1186/1471-2164-15-378), 2014-05-16
Supplement: 12864_2013_6083_MOESM13_ESM.pdf [file 12864_2013_6083_MOESM13_ESM.pdf]

**Table S11** ESTs of *Triticum aestivum* encoding proteins related to cell cycle regulation

| Sequence ID  | Fold<br>Change <sup>a</sup> | <i>p</i> -value | Sequence description                                         |
|--------------|-----------------------------|-----------------|--------------------------------------------------------------|
| Ta_S58854607 | 59.8                        | 0.0012          | Replication factor C                                         |
| Ta_S52547097 | 46.7                        | 0.0285          | Cyclin-Dependent protein Kinase                              |
| Ta_S58857445 | 9.4                         | 0.0093          | Serine threonine-protein kinase rio1                         |
| Ta_S59490000 | 6.9                         | 0.0465          | MYB transcription factor                                     |
| Ta_S58842184 | 5.7                         | 0.0282          | Serine threonine-protein kinase rio1-like                    |
| contig_3741  | 3.7                         | 0.0003          | Beta-expansin 2 precursor                                    |
| Ta_S32510701 | 3.5                         | 0.0240          | Mitogen-activated protein kinase 6-like (MAPK)               |
| contig_1285  | 3.3                         | 0.0489          | Microtubule organization protein                             |
| contig_3699  | 2.8                         | 0.0253          | Histidine kinase                                             |
| contig_708   | 2.6                         | 0.0417          | Secondary cell wall-related glycosyltransferase (TaGT47-12 ) |
| contig_5714  | 2.6                         | 0.0393          | Actin depolymerizing factor 4                                |
| Ta_S17893420 | 2.4                         | 0.0084          | Beta-expansin                                                |
| Ta_S20999571 | 2.3                         | 0.0303          | Xyloglucan endotransglucosylase hydrolase                    |
| contig_5981  | 2.3                         | 0.0200          | Serine threonine-protein kinase sapk3-like (MAP kinase 12)   |
| contig_5777  | 2.2                         | 0.0345          | Beach domain-containing protein (IvsA-like)                  |
| contig_1554  | 2.1                         | 0.0463          | Actin-related protein 2 3 complex subunit 2-like             |
| Ta_S58888109 | 2.7                         | 0.0154          | TPA: nac transcription factor                                |
| contig_2188  | 2.8                         | 0.0288          | Dynammin-like protein                                        |
| contig_206   | 3.1                         | 0.0406          | Wall-associated receptor kinase 3-like                       |
| Ta_S13051479 | 3.4                         | 0.0261          | Serine threonine-protein kinase (afc1)                       |
| Ta_S22370925 | 3.7                         | 0.0285          | Cyclin-dependent protein                                     |
| Ta_S59490003 | 4.9                         | 0.0402          | Transcription factor R2R3-MYB                                |
| contig_2559  | 2.1                         | 0.0428          | <i>IvsA-like</i>                                             |

<sup>a</sup> Fold-change in red indicates down-regulation in colonized roots wheat roots (CWR).
